# Supplementary material for: Improved synthesis of 2,4,6-trialkylpyridines from 1,5-diketoalkanes: the total synthesis of Anibamine
Source: Royal Society of Chemistry journal article supplement (doi:10.1039/c8ob02723d), 2018-11-28
Supplement: c8ob02723d1.pdf [file c8ob02723d1.pdf]

## ***Supporting Information***

Improved synthesis of 2,4,6-trialkylpyridines from 1,5-diketoalkanes: total synthesis of Anibamine

Takeru Miyakoshi, Hiroyuki Konno

*Department of Biochemical Engineering, Graduate School of Science and Technology,  
Yamagata University, Yonezawa, Yamagata 992-8510, Japan*

*e-mail: [konno@yz.yamagata-u.ac.jp](mailto:konno@yz.yamagata-u.ac.jp)*

### Contents

|                                                              |        |
|--------------------------------------------------------------|--------|
| Synthetic procedures for 4a, b, d, e and f and 3a-g          | S2-S6  |
| <sup>1</sup> H and <sup>13</sup> C NMR spectral data         | S7-S56 |
| Spectral comparison with natural anibamine and synthetic one | S57    |

## Synthetic procedures for 4a, b, d, e, f and 3a-g

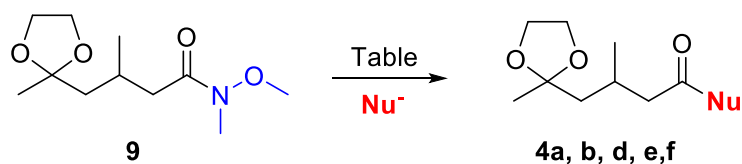

| condition                                              | product   | yield (%) |
|--------------------------------------------------------|-----------|-----------|
| Allylmagnesiumbromide, THF, -78 °C, 3h                 | <b>4a</b> | 85        |
| <i>n</i> -BuLi, ether, -78 °C, 3h                      | <b>4b</b> | 80        |
| Phenylmagnesiumbromide, THF, r.t., 1h                  | <b>4d</b> | 53        |
| <i>p</i> -Tolylmagnesiumbromide, THF, 0 °C to r.t., 3h | <b>4e</b> | 79        |
| 1-Decyne, <i>n</i> -BuLi, THF, -78 °C to r.t., 12h     | <b>4f</b> | 93        |

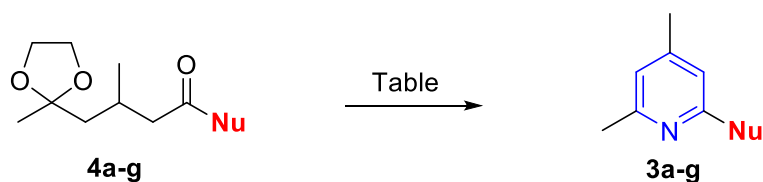

| substrate | condition                                                                                                                                                          | product   | yield (%) <sup>a,b</sup> |
|-----------|--------------------------------------------------------------------------------------------------------------------------------------------------------------------|-----------|--------------------------|
| <b>4a</b> | 1) NH <sub>2</sub> OH•HCl, AcONa, EtOH, H <sub>2</sub> O<br>2) AcOH, reflux<br> | <b>3a</b> | 37                       |
| <b>4c</b> |                                                                                                                                                                    | <b>3c</b> | 61 <sup>c</sup>          |
| <b>4b</b> |                                                                                                                                                                    | <b>3b</b> | 86                       |
| <b>4d</b> |                                                                                                                                                                    | <b>3d</b> | 88                       |
| <b>4e</b> |                                                                                                                                                                    | <b>3e</b> | 78                       |
| <b>4f</b> |                                                                                                                                                                    | <b>3f</b> | 35 <sup>d</sup>          |
| <b>4g</b> |                                                                                                                                                                    | <b>3g</b> | 65                       |
| <b>4b</b> |                                                                                                                                                                    | <b>3b</b> | 31 <sup>e,f</sup>        |

<sup>a</sup>Isolated yield. <sup>b</sup>2 steps yield. <sup>c</sup>Reaction was conducted at 110 °C. <sup>d</sup>Methoxyamine was employed.

<sup>e</sup>Oxime's hydroxy group was mesylated. <sup>f</sup>3 steps yield.

**6-Methyl-8-(2,2-dimethyldioxolane)-nonen-4-one (4a)** To a solution of **9** (303 mg, 1.31 mmol) in THF (4.5 mL) at -78 °C under nitrogen atmosphere was added allylmagnesiumbromide (0.7 M in Et<sub>2</sub>O, 2.70 mL, 1.89 mmol) with dropwise manner and stirred at -78 °C for 3 h. The reaction mixture was quenched by sat. NH<sub>4</sub>Cl aq. at 0 °C and the aqueous phase was extracted by AcOEt, washed with brine, dried over MgSO<sub>4</sub>, filtered and concentrated *in vacuo*. The residue was purified with column chromatography (AcOEt-hexane, 1:5 v/v) to give **4a** (237 mg, 85% yield) as a colorless oil.

**4,6-Dimethyl-2-(propen-1-nyl)-pyridine (3a)** To a solution of **4a** (109 mg, 5.14 mmol) in EtOH (1.6 mL) and H<sub>2</sub>O (1.6 mL) were added NaOAc (77.3 mg, 10.3 mmol) and hydroxylamine hydrochloride (65.5 mg, 10.3 mmol). The reaction mixture was stirred at room temperature overnight. The reaction mixture was added to H<sub>2</sub>O. The aqueous layer was extracted with CHCl<sub>3</sub>. The combined organic layers were dried over MgSO<sub>4</sub>, filtered and concentrated *in vacuo* to give the oxime intermediate. A stirring solution of the oxime intermediate in AcOH (5.8 mL) was refluxed for 24 h. The reaction mixture was cooled to room temperature and the solvent was carefully removed under reduced pressure. The residue was added to sat. NaHCO<sub>3</sub> aq. and the aqueous layer was extracted with CH<sub>2</sub>Cl<sub>2</sub>. The organic layers were washed with brine, dried over MgSO<sub>4</sub>, filtered and concentrated *in vacuo*. The residue was purified with column chromatography (AcOEt-hexane, 1:4 v/v) to give **3a** (28.3 mg, 37% yield over 2 steps) as a yellow oil.

**4,6-Dimethyl-2-(propanyl)-pyridine (3c)** To a solution of **4c** (91.9 mg, 0.439 mmol) in EtOH (1.4 mL) and H<sub>2</sub>O (1.4 mL) was added AcONa (360 mg, 4.39 mmol), hydroxylamine hydrochloride (153 mg, 2.20 mmol). The reaction mixture was stirred overnight. The reaction mixture was added to H<sub>2</sub>O and separated. The aqueous layer was extracted with CHCl<sub>3</sub>. The combined organic layers were dried over MgSO<sub>4</sub>, filtered and concentrated *in vacuo* to give the oxime intermediate. A stirring solution of the oxime intermediate in AcOH (5.5 mL) was heated at 110 °C for 1 h. The reaction mixture was cooled to room temperature and the solvent was carefully removed under reduced pressure. The residue was added to sat. NaHCO<sub>3</sub> aq. and the aqueous layer was extracted with CH<sub>2</sub>Cl<sub>2</sub>. The organic layers were washed with brine, dried over MgSO<sub>4</sub>,

filtered and concentrated *in vacuo*. The residue was purified with column chromatography (AcOEt-hexane, 1:5 v/v) to give **3c** (38.9 mg, 61% yield over 2 steps) as a yellow oil.

**3-Methyl-5-(2,2-dimethyldioxolane)-1-phenylhexanone (4d)** To a solution of THF (4.3 mL) was added Mg (110 mg, mmol), iodide (catalytic amount) and bromobenzene (0.20 mL) under nitrogen atmosphere. After color of the reaction mixture changed into colorless, the reaction mixture was added bromobenzene (0.25 mL) dropwise. To this solution was added **9** (105 mg, 0.454 mmol) in THF (1.5 mL) dropwise at room temperature and stirred for 1 h. The reaction mixture was quenched with sat. NH<sub>4</sub>Cl aq. at 0 °C. The aqueous phase was extracted by Et<sub>2</sub>O, washed with 1M NaOH, dried over MgSO<sub>4</sub>, filtered and concentrated *in vacuo*. The residue was purified with column chromatography (AcOEt-hexane, 1:6 v/v) to give **4d** (60.2 mg, 53% yield) as a colorless oil.

**4,6-Dimethyl-2-phenylpyridine (3d)** To a solution of **4d** (14.4 mg, 0.05 mmol) in EtOH (0.2 mL) and H<sub>2</sub>O (0.2 mL) were added AcONa (41 mg, 0.5 mmol) and hydroxylamine hydrochloride (18 mg, 0.25 mmol). The reaction mixture was stirred at 45 °C overnight. The reaction mixture was added to H<sub>2</sub>O and separated. The aqueous layer was extracted with CHCl<sub>3</sub>. The combined organic layers were dried over MgSO<sub>4</sub>, filtered and concentrated *in vacuo* to give the oxime intermediate. A stirring solution of the oxime intermediate in AcOH (1.2 mL) was refluxed for 16 h. The reaction mixture was cooled to room temperature and the solvent was carefully removed under reduced pressure. The residue was added to sat. NaHCO<sub>3</sub> aq. and extracted with CH<sub>2</sub>Cl<sub>2</sub>. The organic layers were washed with brine, dried over MgSO<sub>4</sub>, filtered and concentrated *in vacuo*. Purification of column chromatography (AcOEt-hexane, 1:6 v/v) gave **3d** (8.0 mg, 88% yield over 2 steps) as a pale orange oil.

**p-Methylphenyl-3-methyl-5-(2,2-dimethyldioxolane)-hexanone (4e)** To a solution of **9** (31.6 mg, 0.137 mmol) in THF (0.4 mL) was added *p*-tolylmagnesium bromide (0.1 M in THF, 4 mL, 0.39 mmol) at 0 °C, then warmed to room temperature and stirred for 3 h. The reaction mixture was quenched with sat. NH<sub>4</sub>Cl aq. at 0 °C. The aqueous phase was extracted by Et<sub>2</sub>O, washed with 1M NaOH, dried over MgSO<sub>4</sub>, filtered and



concentrated *in vacuo*. The residue was purified with column chromatography (AcOEt-hexane, 1:4 v/v) to give **4e** (32.6 mg, 79% yield) as a colorless oil.

**2-*p*-Methylphenyl-4,6-dimethylpyridine (3e)** To a solution of **4e** (32.6 mg, 0.11 mmol) in EtOH (0.4 mL) and H<sub>2</sub>O (0.4 mL) were added AcONa (90.2 mg, 1.1 mmol) and hydroxylamine hydrochloride (38.2 mg, 0.55 mmol). The reaction mixture was stirred at 45 °C overnight. The reaction mixture was added to H<sub>2</sub>O and separated. The aqueous layer was extracted with CHCl<sub>3</sub>. The combined organic layers were dried over MgSO<sub>4</sub>, filtered and concentrated *in vacuo* to give the oxime intermediate. A stirring solution of the oxime intermediate in AcOH (2.5 mL) was refluxed for 23 h. The reaction mixture was cooled to room temperature and the solvent was carefully removed under reduced pressure. The residue was added to sat. NaHCO<sub>3</sub> aq. and extracted with CH<sub>2</sub>Cl<sub>2</sub>. The organic layers were washed with brine, dried over MgSO<sub>4</sub>, filtered and concentrated *in vacuo*. The residue was purified with column chromatography (AcOEt-hexane, 1:6 v/v) to give **3e** (16.4 mg, 78% yield over 2 steps) as a pink oil.

**4-Methyl-2-(2,2-dimethyldioxolane)-7-hexadecyn-6-one (4f)** To a solution of 1-Decyne (295 µL, 1.43 mmol) in THF (1.4 mL) at -78 °C under nitrogen atmosphere was added *n*-BuLi (2.5 M in hexane, 0.6 mL, 1.30 mmol) at -78 °C. After the stirring for 30 min at 0 °C, **9** (101 mg, 0.437 mmol) was added to the mixture at -78 °C and the reaction mixture was allowed to warm to room temperature. After the stirring for 12 h, the reaction was quenched with sat. NH<sub>4</sub>Cl aq. at 0 °C. The aqueous layer was extracted with AcOEt and the combined organic layers were washed with brine, dried over MgSO<sub>4</sub>, filtered and concentrated *in vacuo*. The residue was purified with column chromatography (AcOEt-hexane, 1:8 v/v) to give **4f** (125 mg, 93% yield) as a colorless oil.

**2-Decynyl-4,6-dimethylpyridine (3f)** To a solution of **4f** (51.1 mg, 0.166 mmol) in EtOH (0.5 mL) and H<sub>2</sub>O (0.5 mL) was added AcONa (136 mg, 1.66 mmol), methoxyamine hydrochloride (0.15 mL, 0.83 mmol) and stirred at room temperature overnight. The reaction mixture was added to H<sub>2</sub>O. The aqueous layer was extracted with CHCl<sub>3</sub>. The combined organic layers were dried over MgSO<sub>4</sub>, filtered and concentrated *in vacuo* to give the methoxyamine intermediate. A stirring solution of the methoxyamine intermediate in AcOH (2.1 mL) was refluxed for 6 h. The reaction

mixture was cooled to room temperature and the solvent was carefully removed under reduced pressure. The residue was added to sat.  $\text{NaHCO}_3$  aq. and extracted with  $\text{CH}_2\text{Cl}_2$ . The organic layers were washed with brine, dried over  $\text{MgSO}_4$ , filtered and concentrated *in vacuo*. The residue was purified with column chromatography (AcOEt-hexane, 1:8 v/v) to give **3f** (14.4 mg, 36% yield over 2 steps) as a yellow oil.

**2-Decanyl-4,6-dimethylpyridine (3g)** To a solution of **4g** (72.3 mg, 0.231 mmol) in EtOH (0.8 mL) and  $\text{H}_2\text{O}$  (0.8 mL) were added AcONa (189 mg, 2.31 mmol) and hydroxylamine hydrochloride (80.3 mg, 1.16 mmol). After the stirring overnight, the reaction mixture was added to  $\text{H}_2\text{O}$ . The aqueous layer was extracted with  $\text{CHCl}_3$ . The combined organic layers were dried over  $\text{MgSO}_4$ , filtered and concentrated *in vacuo* to give the oxime intermediate. A stirring solution of the oxime intermediate in AcOH (2.9 mL) was refluxed for 1 h. The reaction mixture was cooled to room temperature and the solvent was carefully removed under reduced pressure. The residue was added to sat.  $\text{NaHCO}_3$  aq. and extracted with  $\text{CH}_2\text{Cl}_2$ . The organic fractions were washed with brine, dried over  $\text{MgSO}_4$ , filtered and concentrated *in vacuo*. The residue was purified with column chromatography (AcOEt-hexane, 1:10 v/v) gave **3g** (37.3 mg, 65% yield over 2 steps) as a yellow oil.

<sup>1</sup>H NMR of **2a**

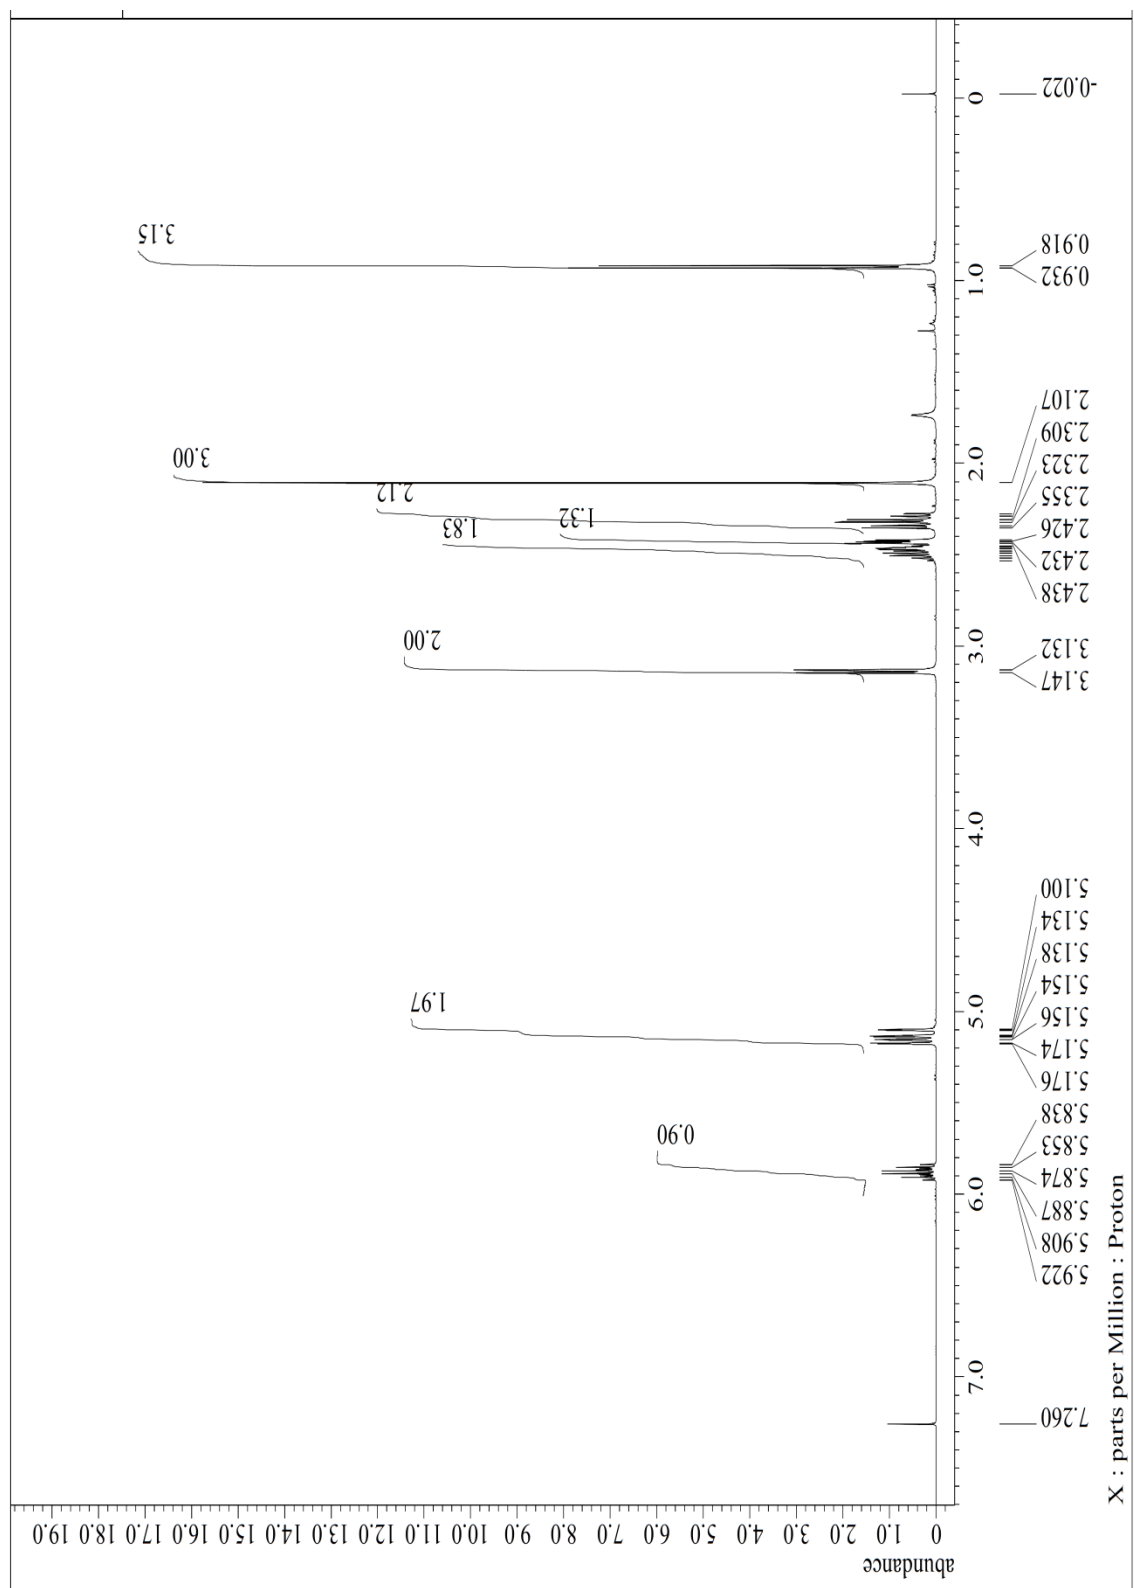

<sup>13</sup>C NMR of **2a**

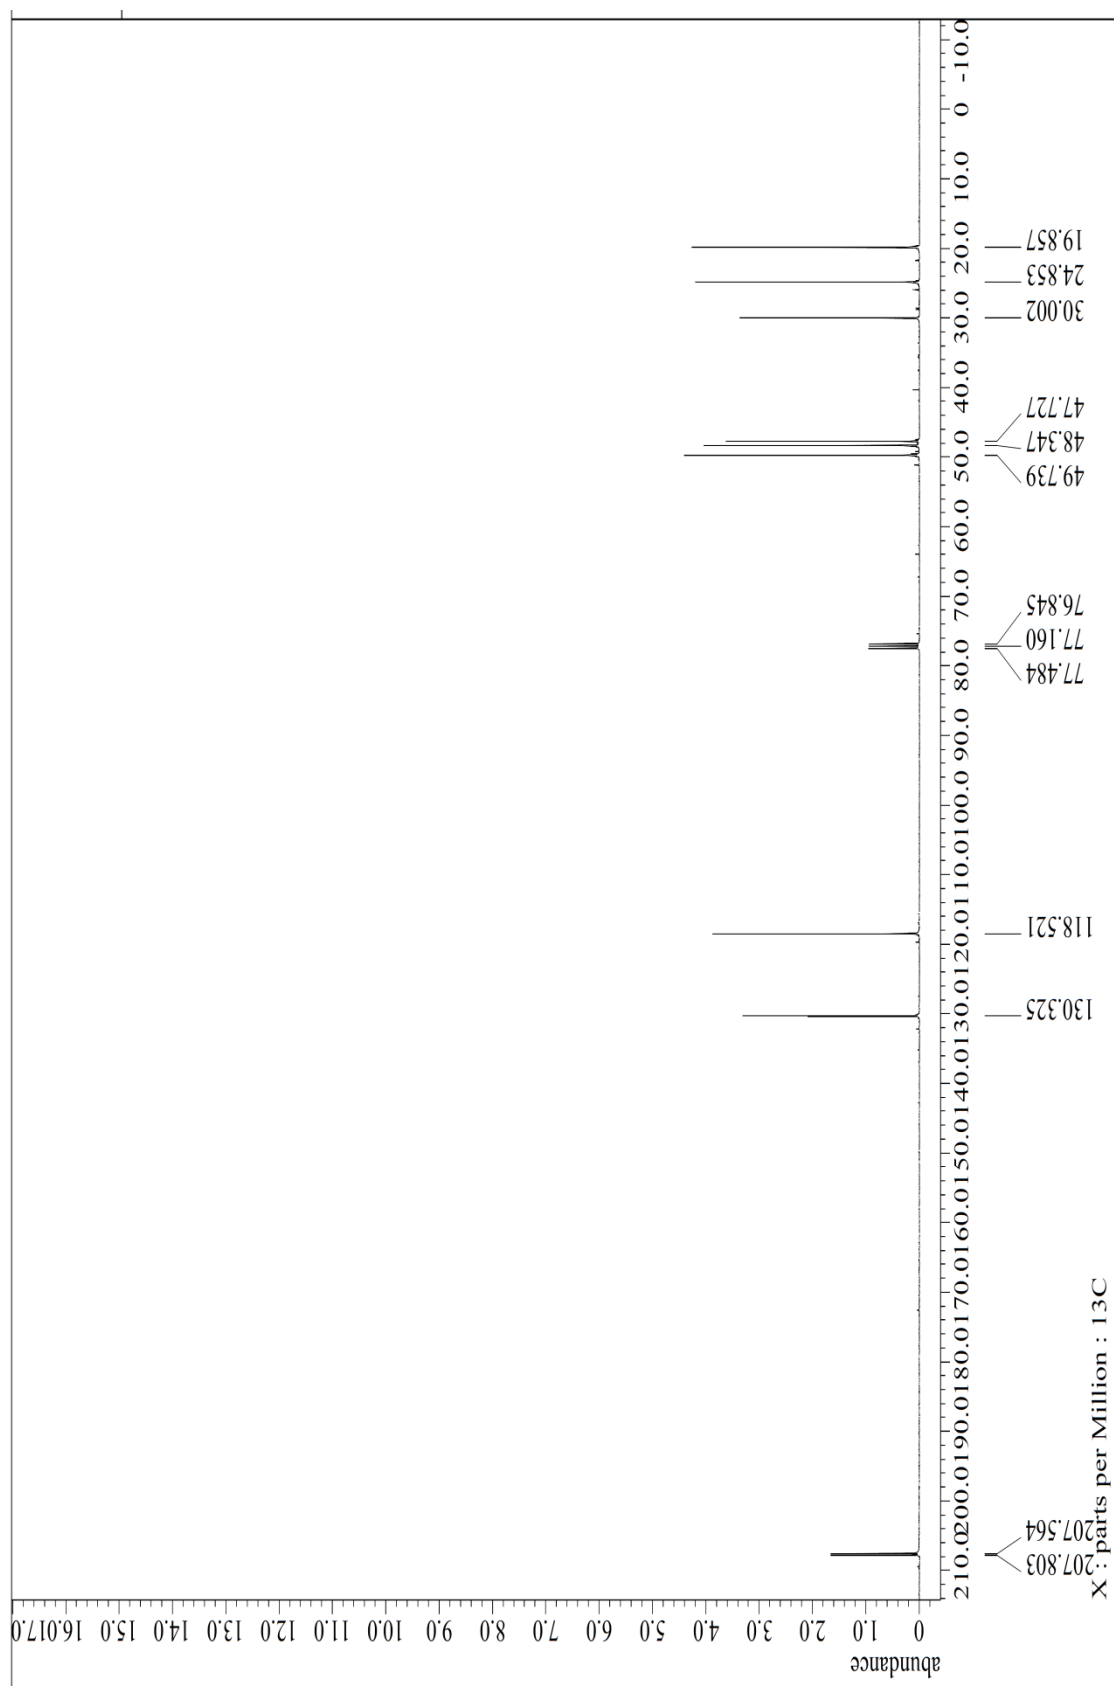

$^1\text{H}$  NMR of **2b**

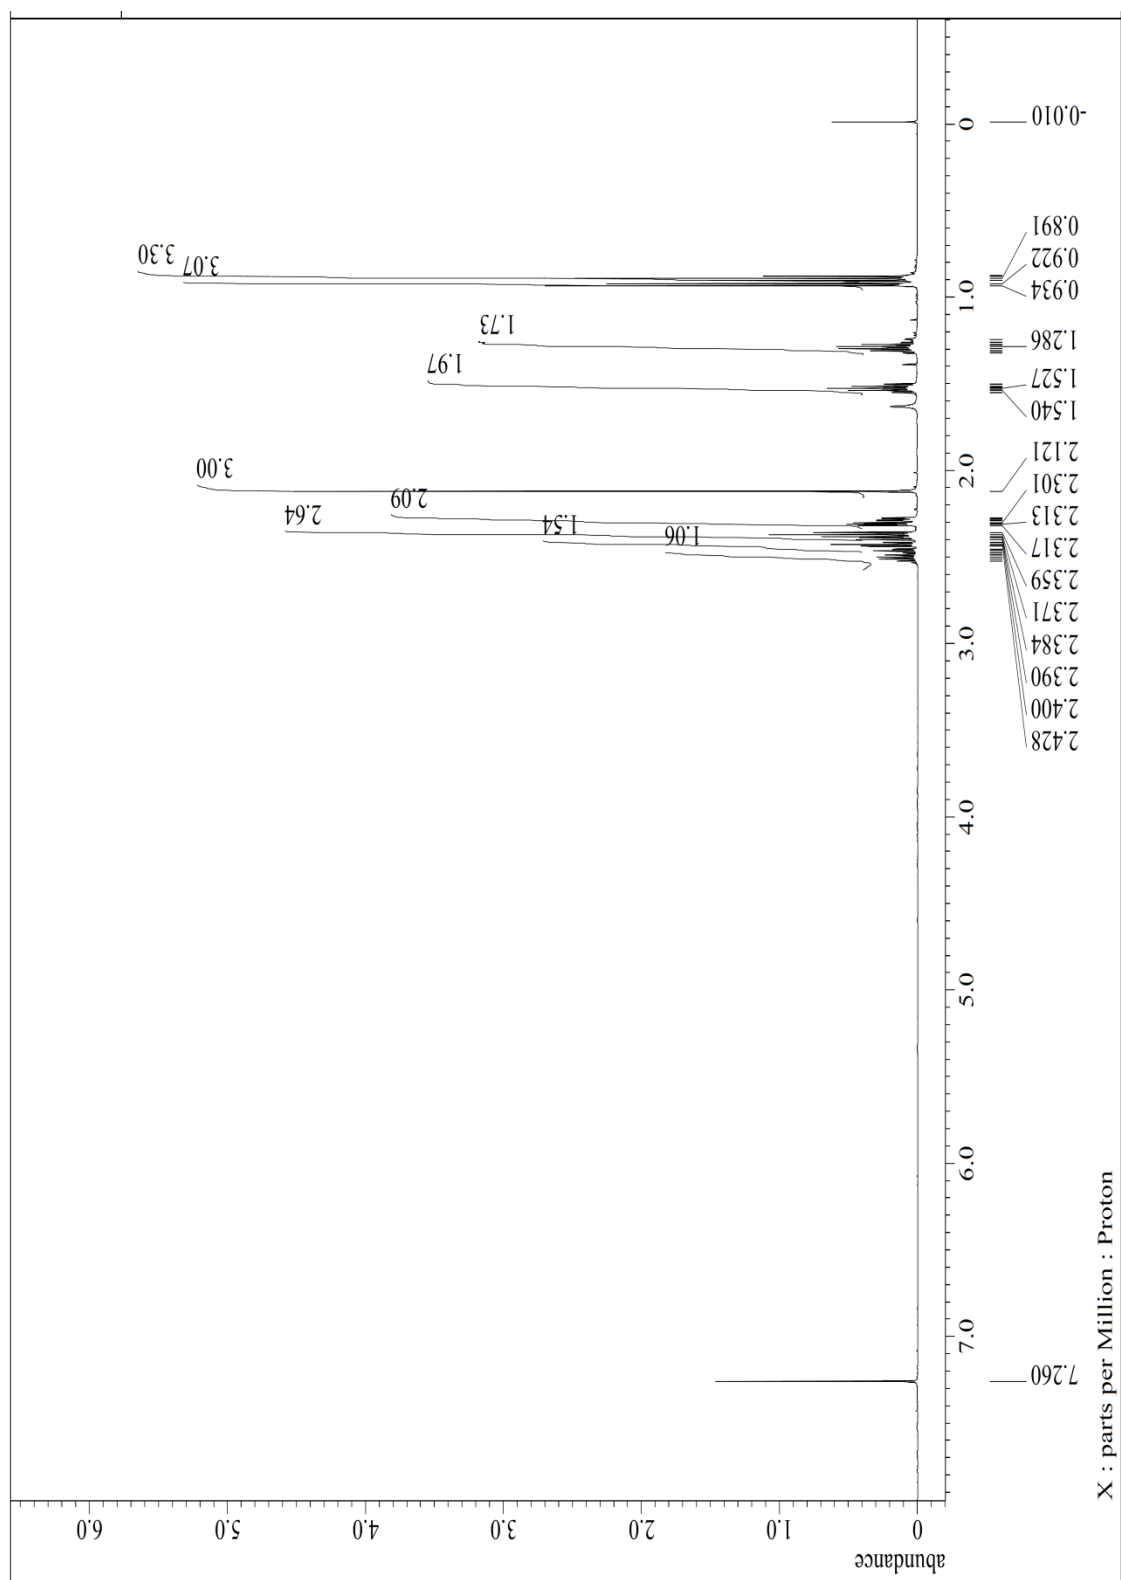

<sup>13</sup>C NMR of **2b**

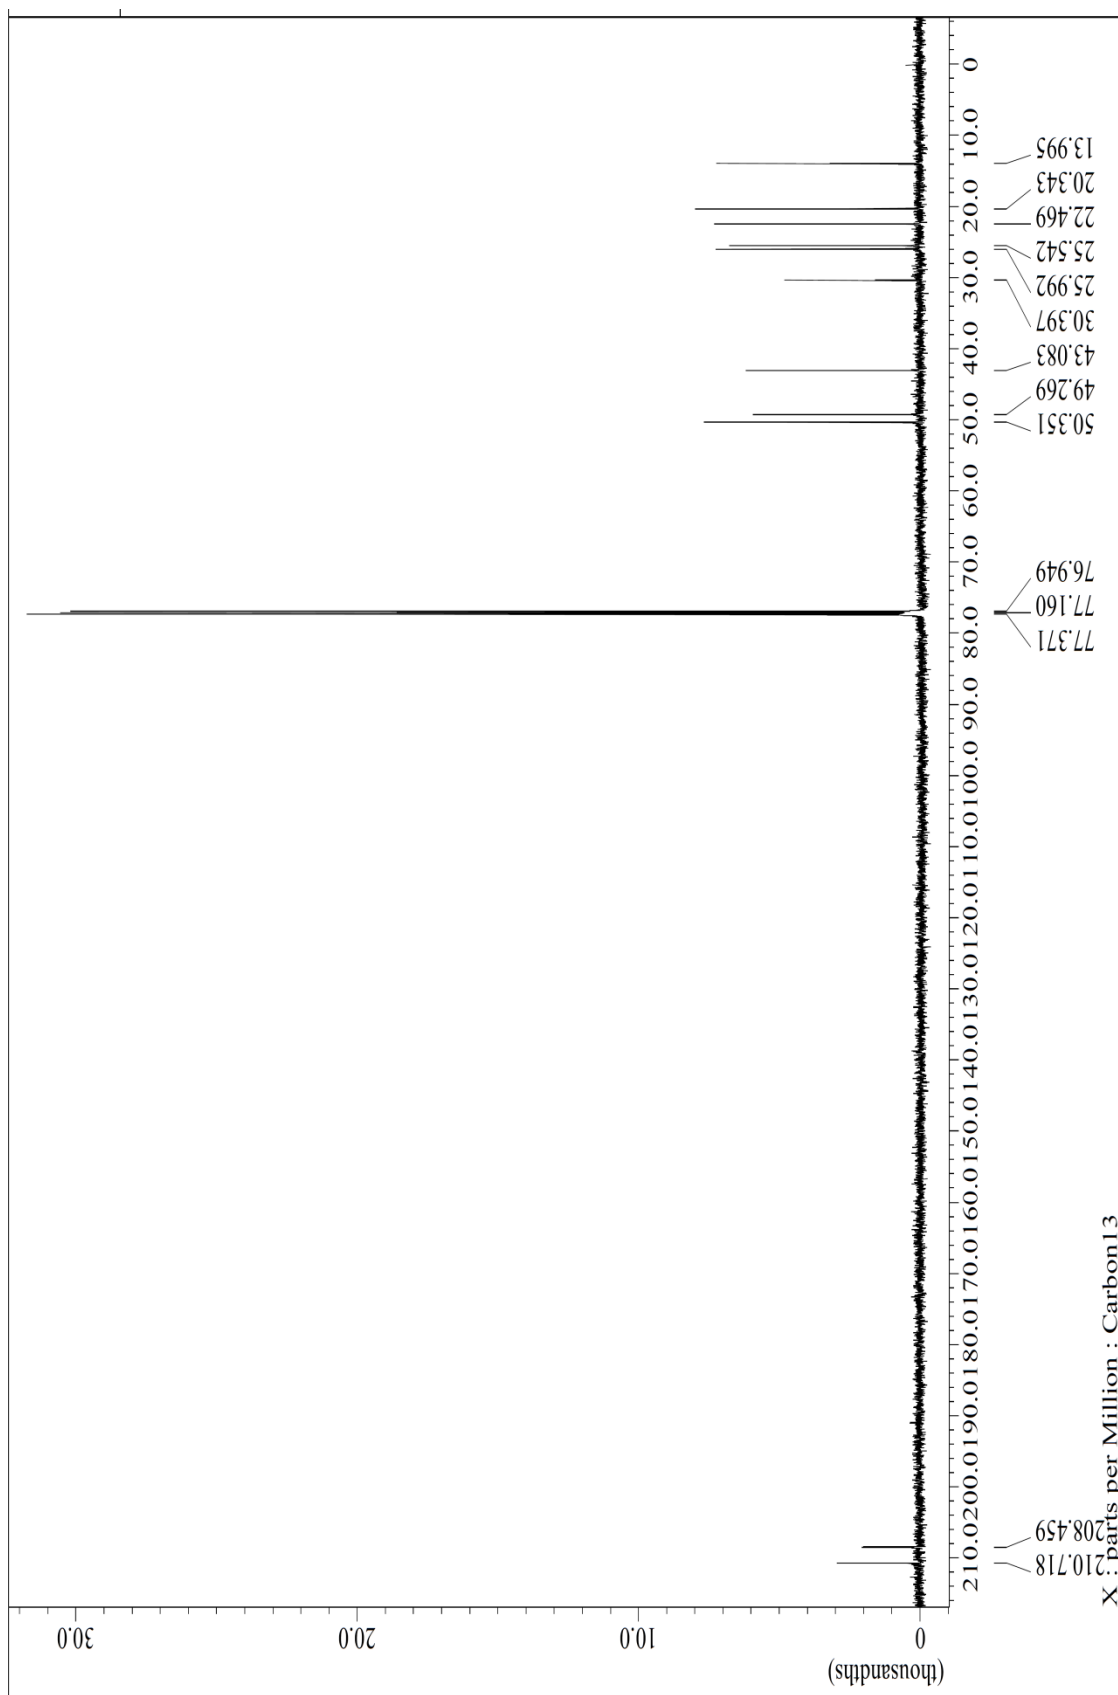

<sup>1</sup>H NMR of **3a**

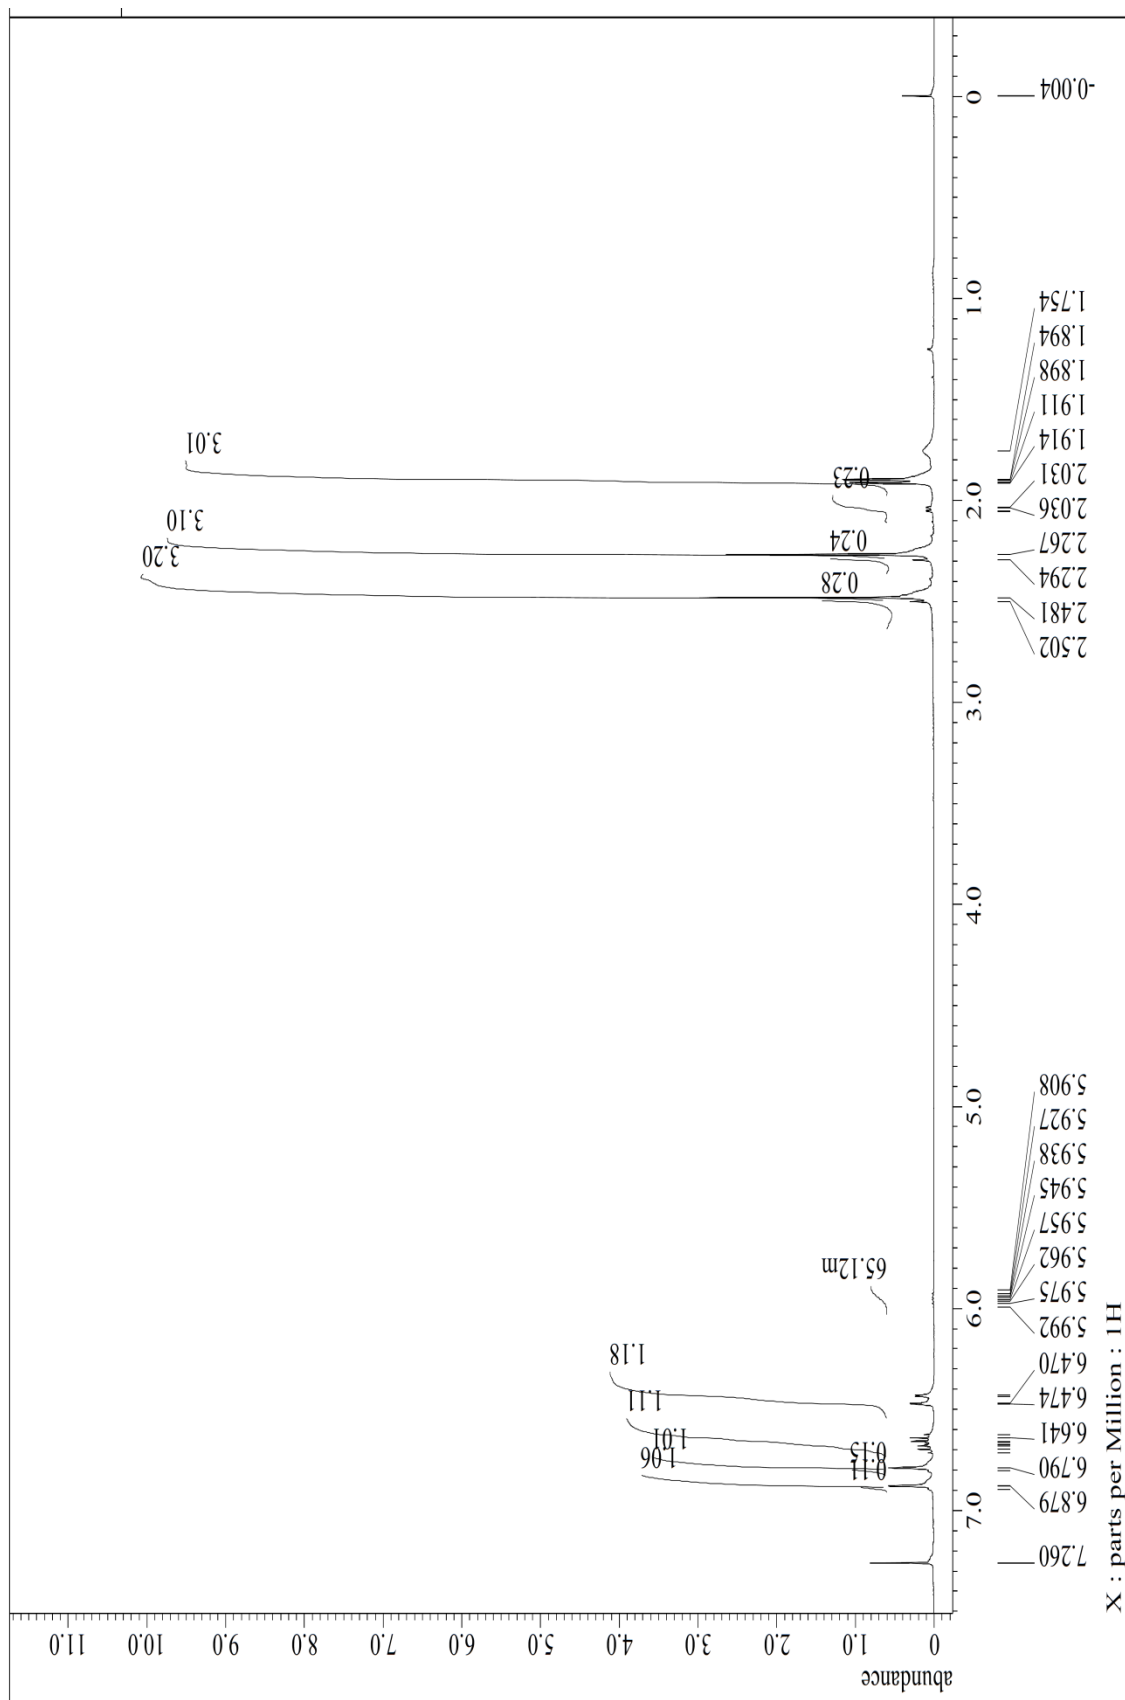

$^{13}\text{C}$  NMR of **3a**

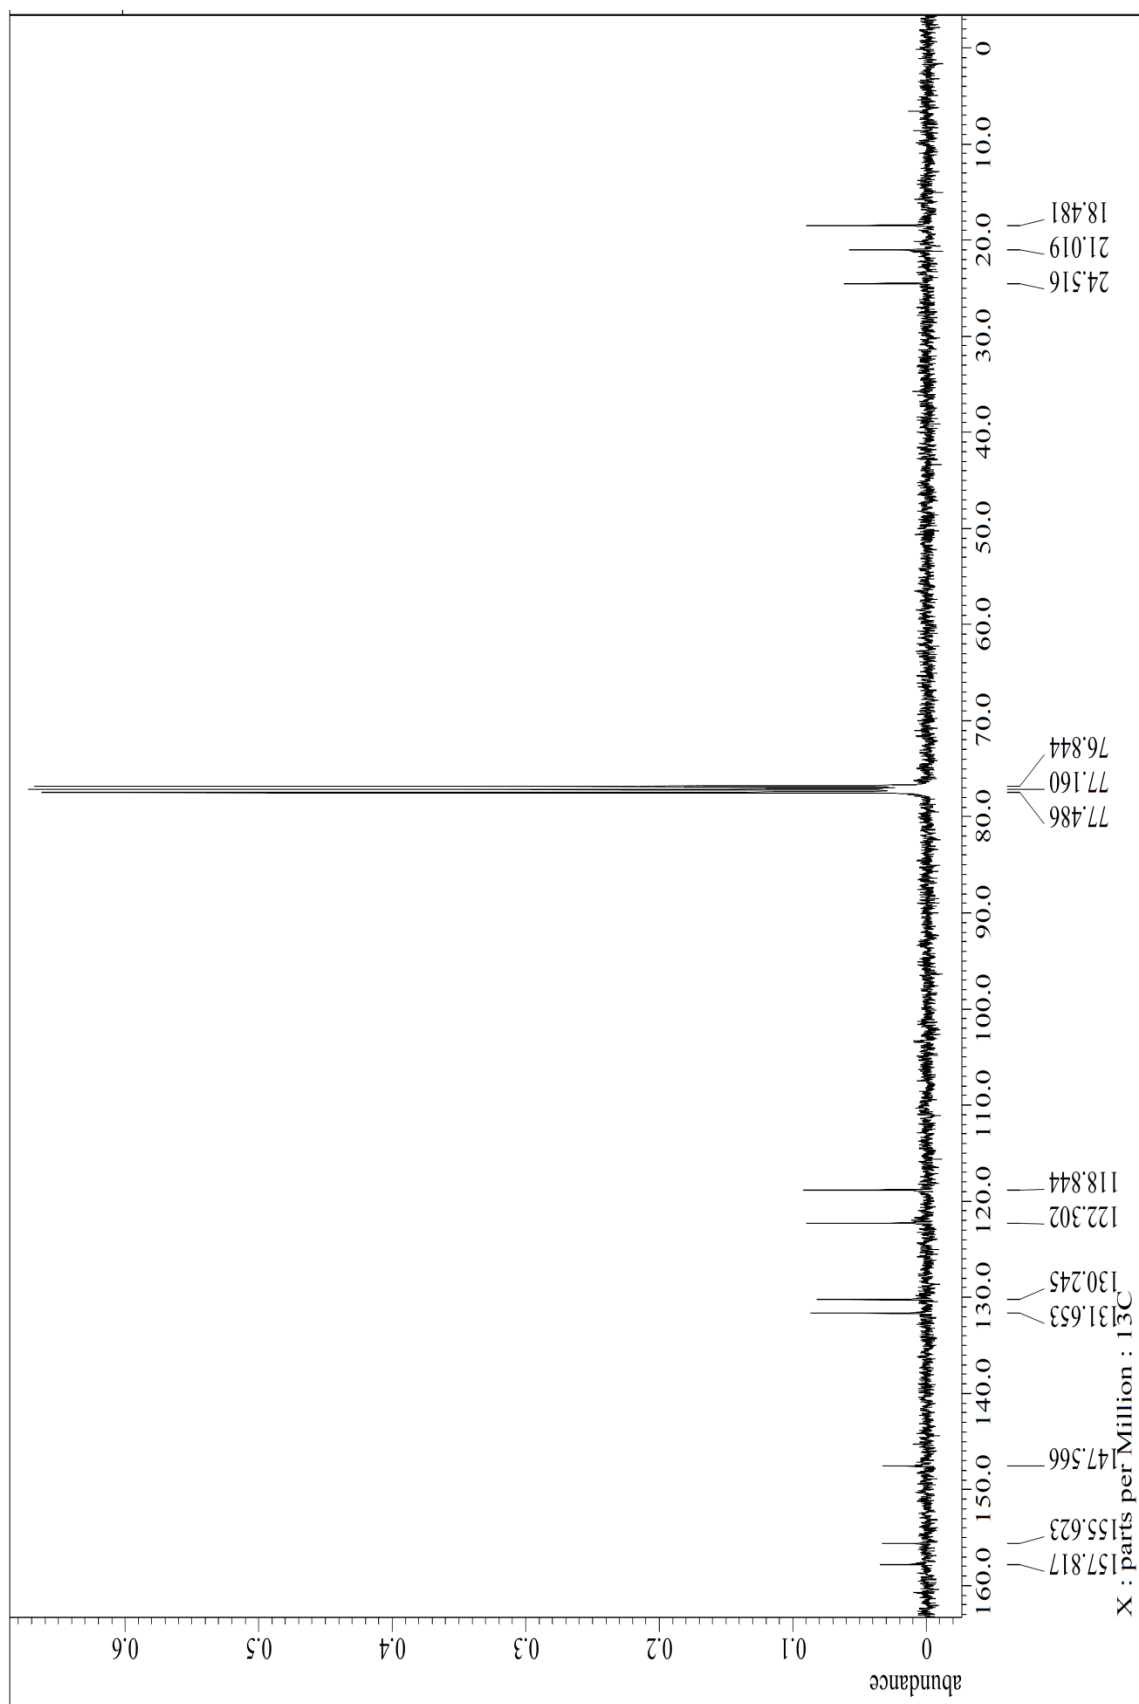



<sup>1</sup>H NMR of **3b**

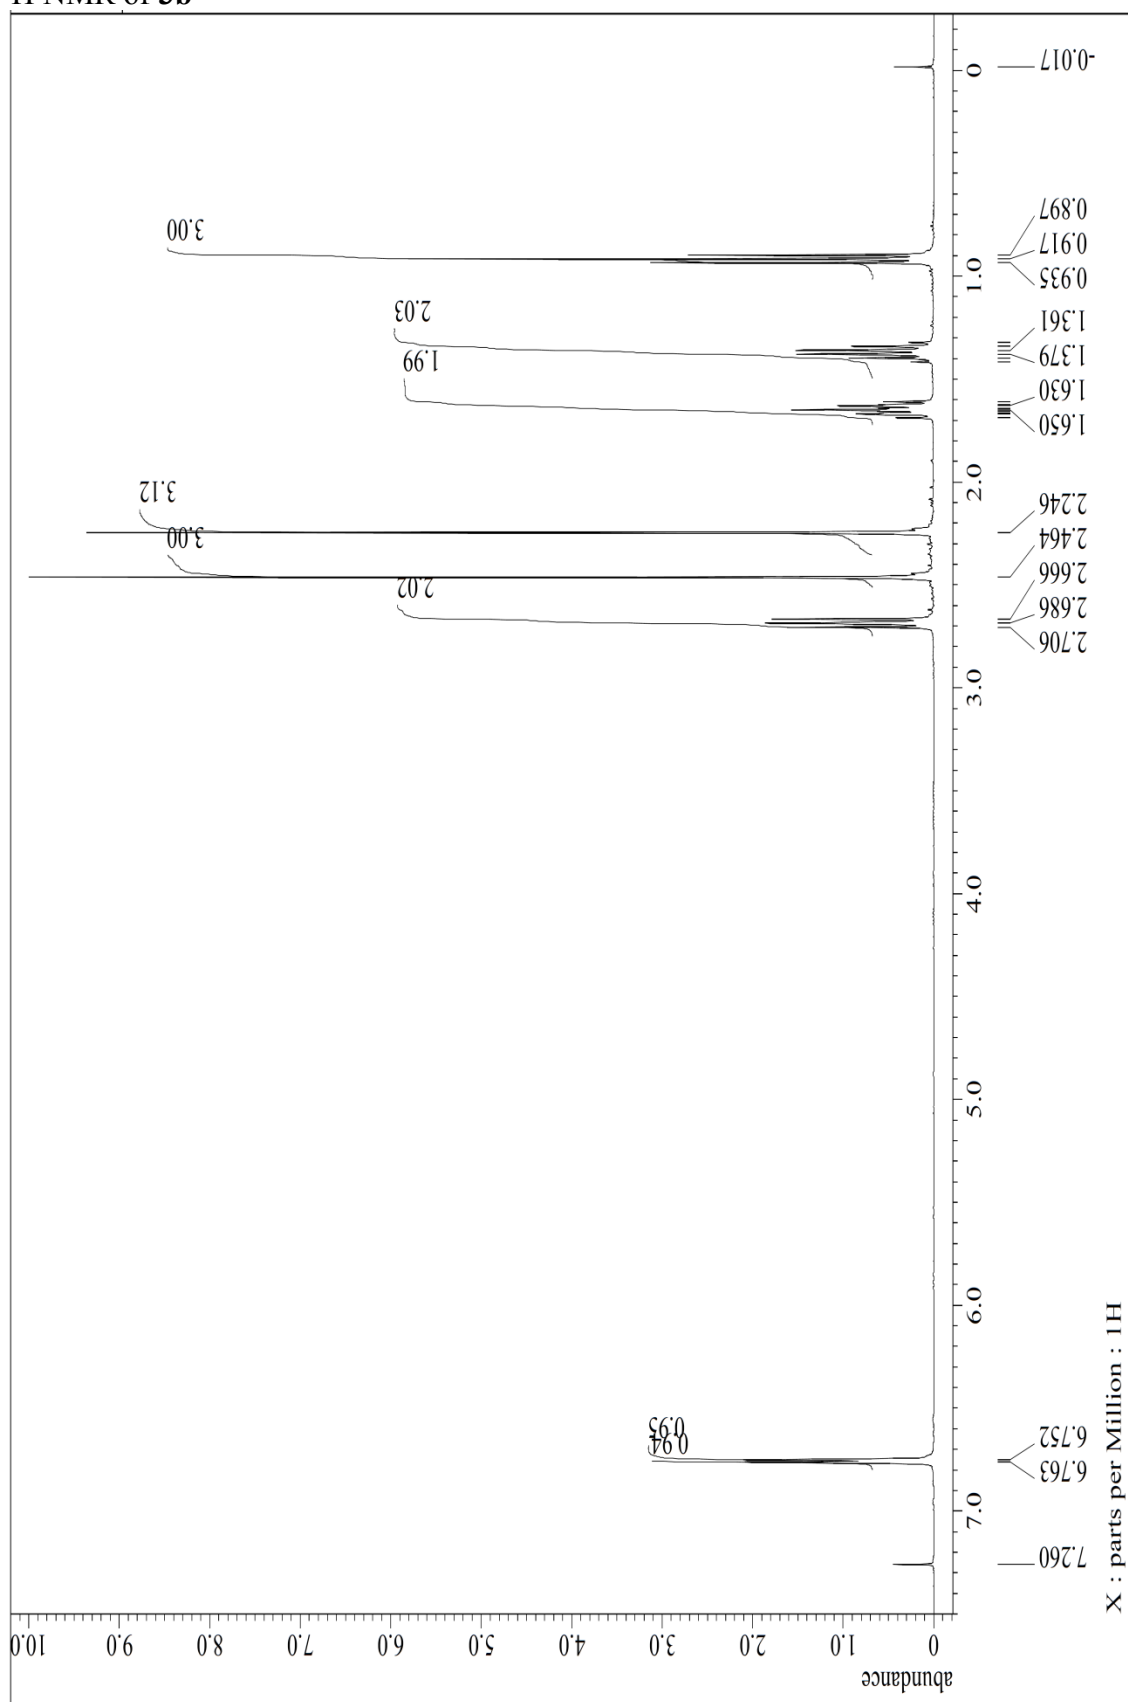

<sup>13</sup>C NMR of **3b**

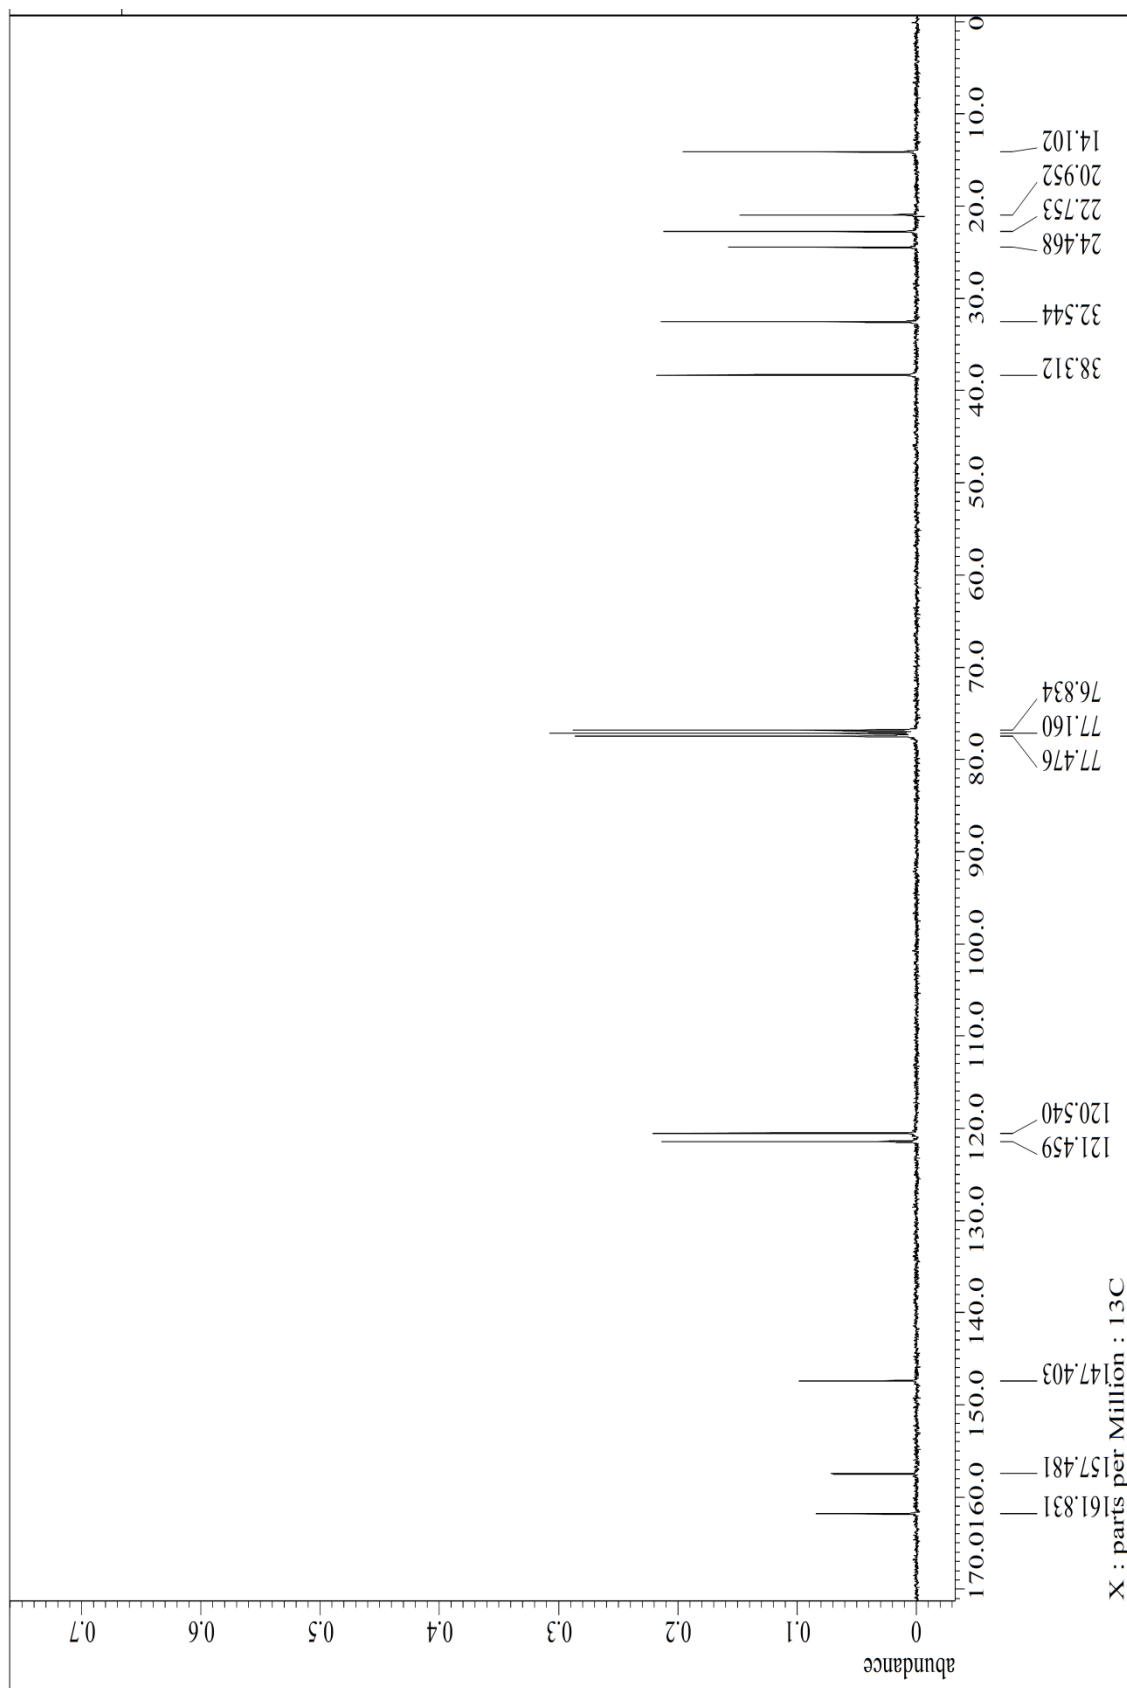

<sup>1</sup>H NMR of **4a**

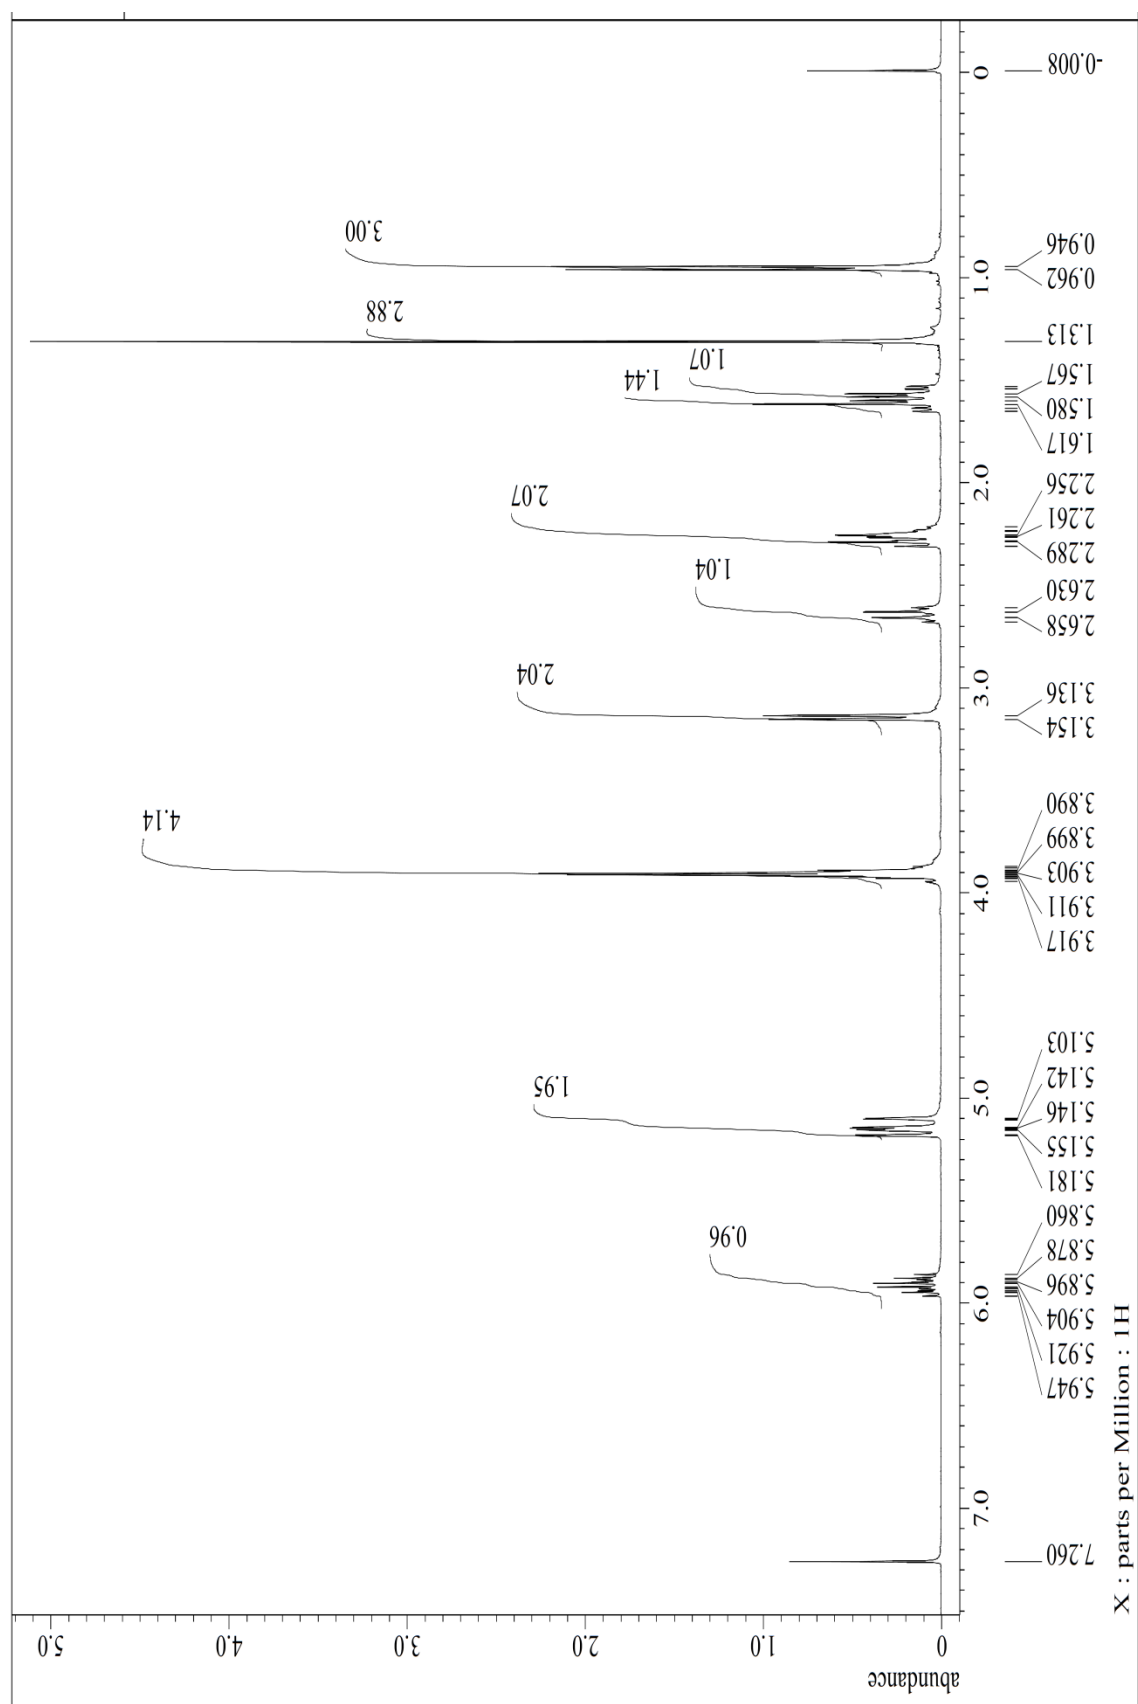

<sup>13</sup>C NMR of **4a**

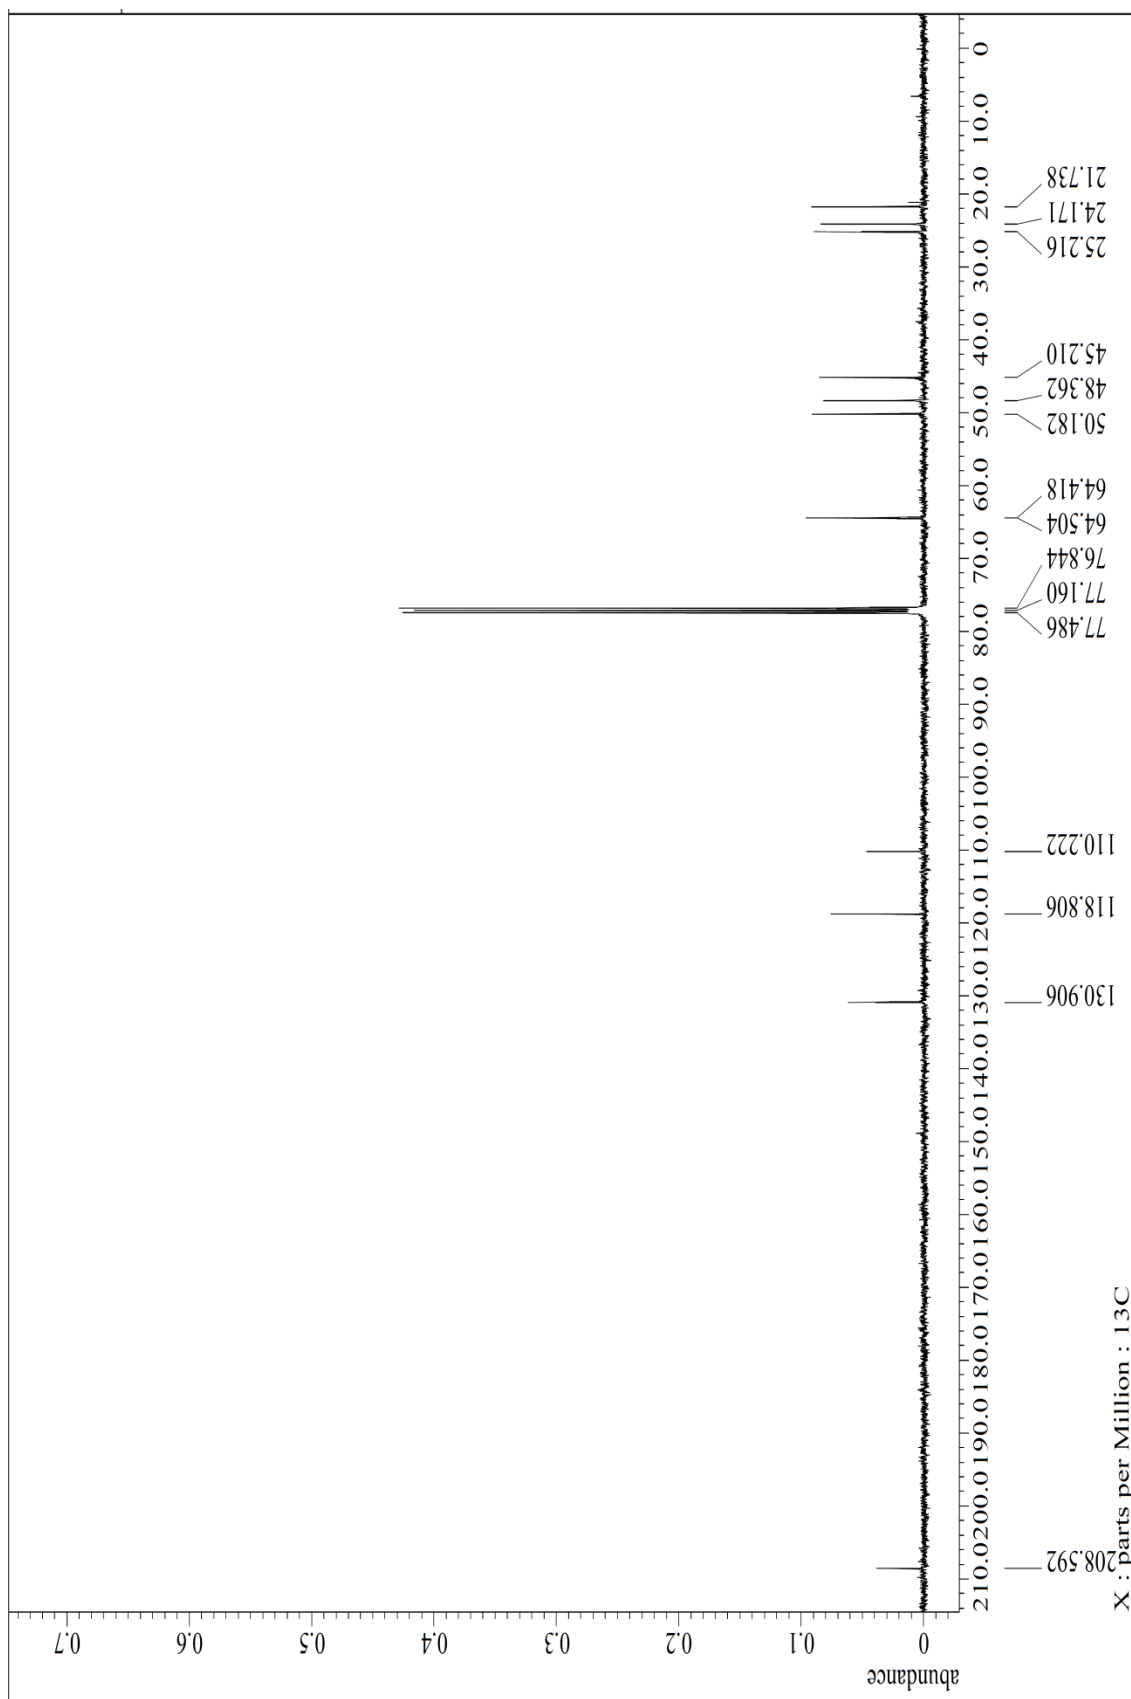

<sup>1</sup>H NMR of **4c**

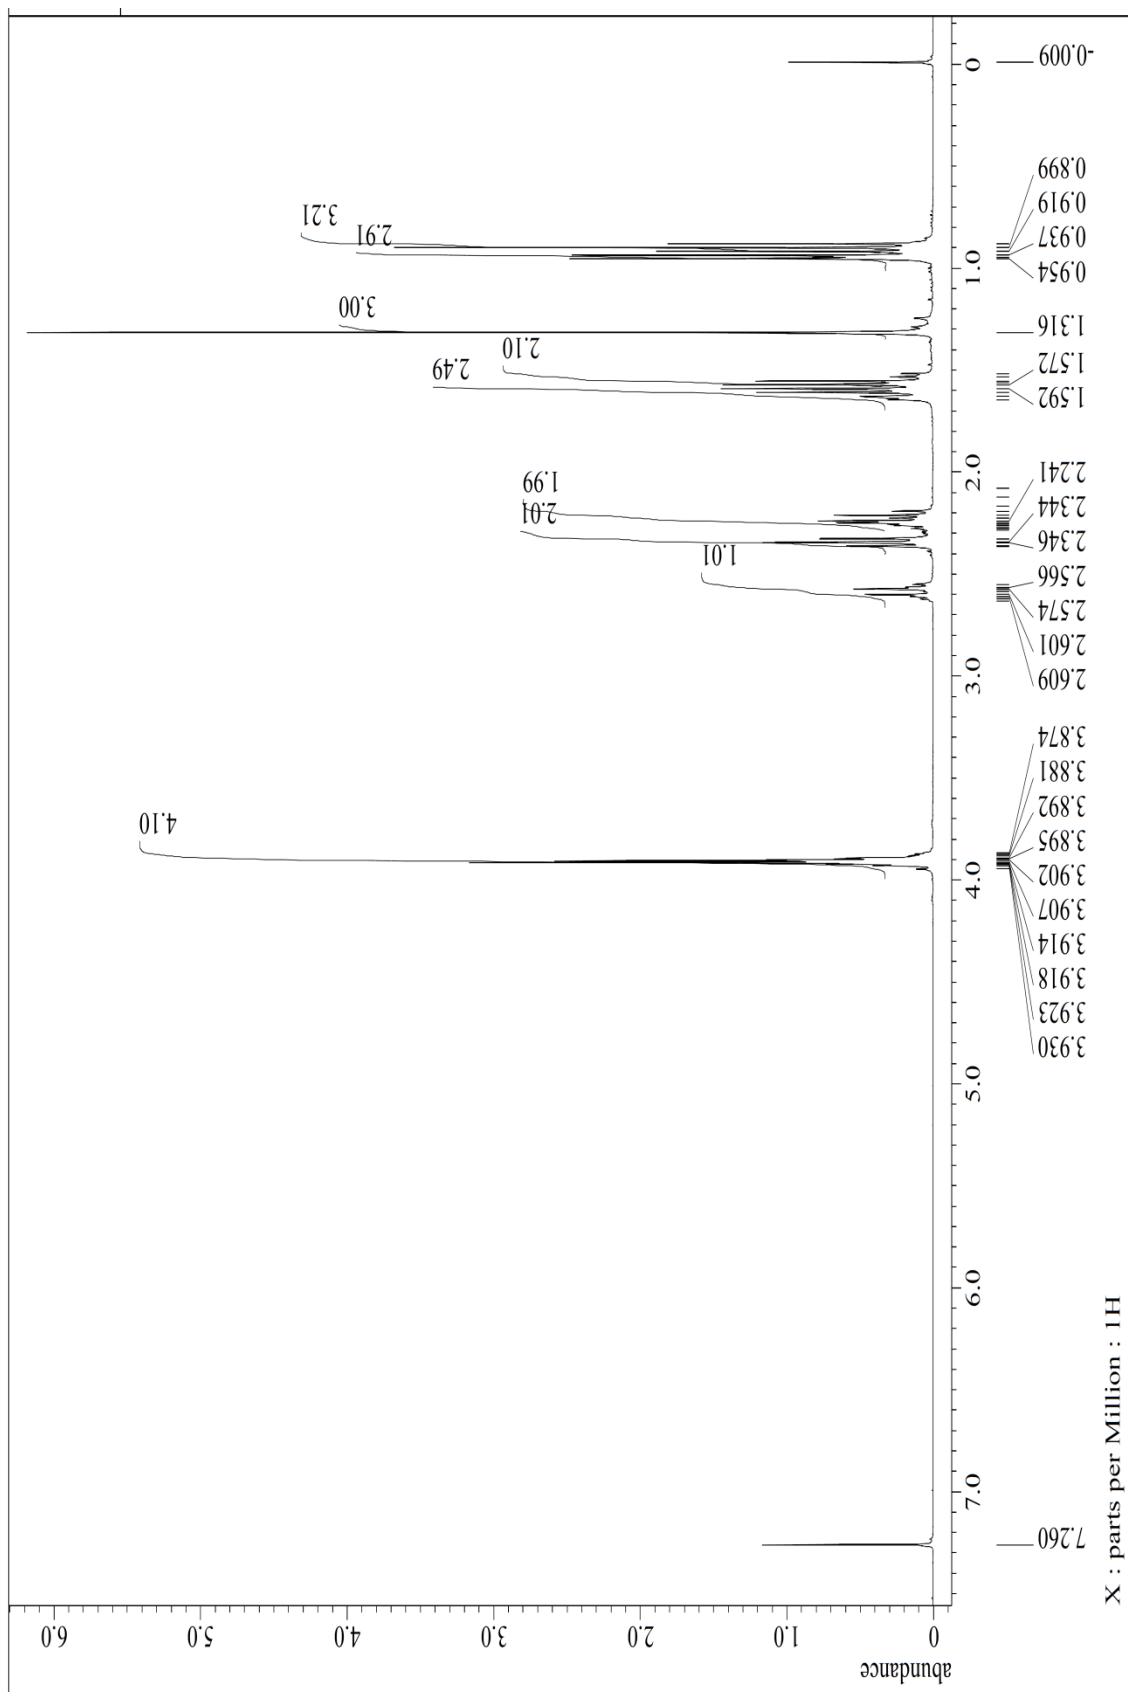

<sup>13</sup>C NMR of **4c**

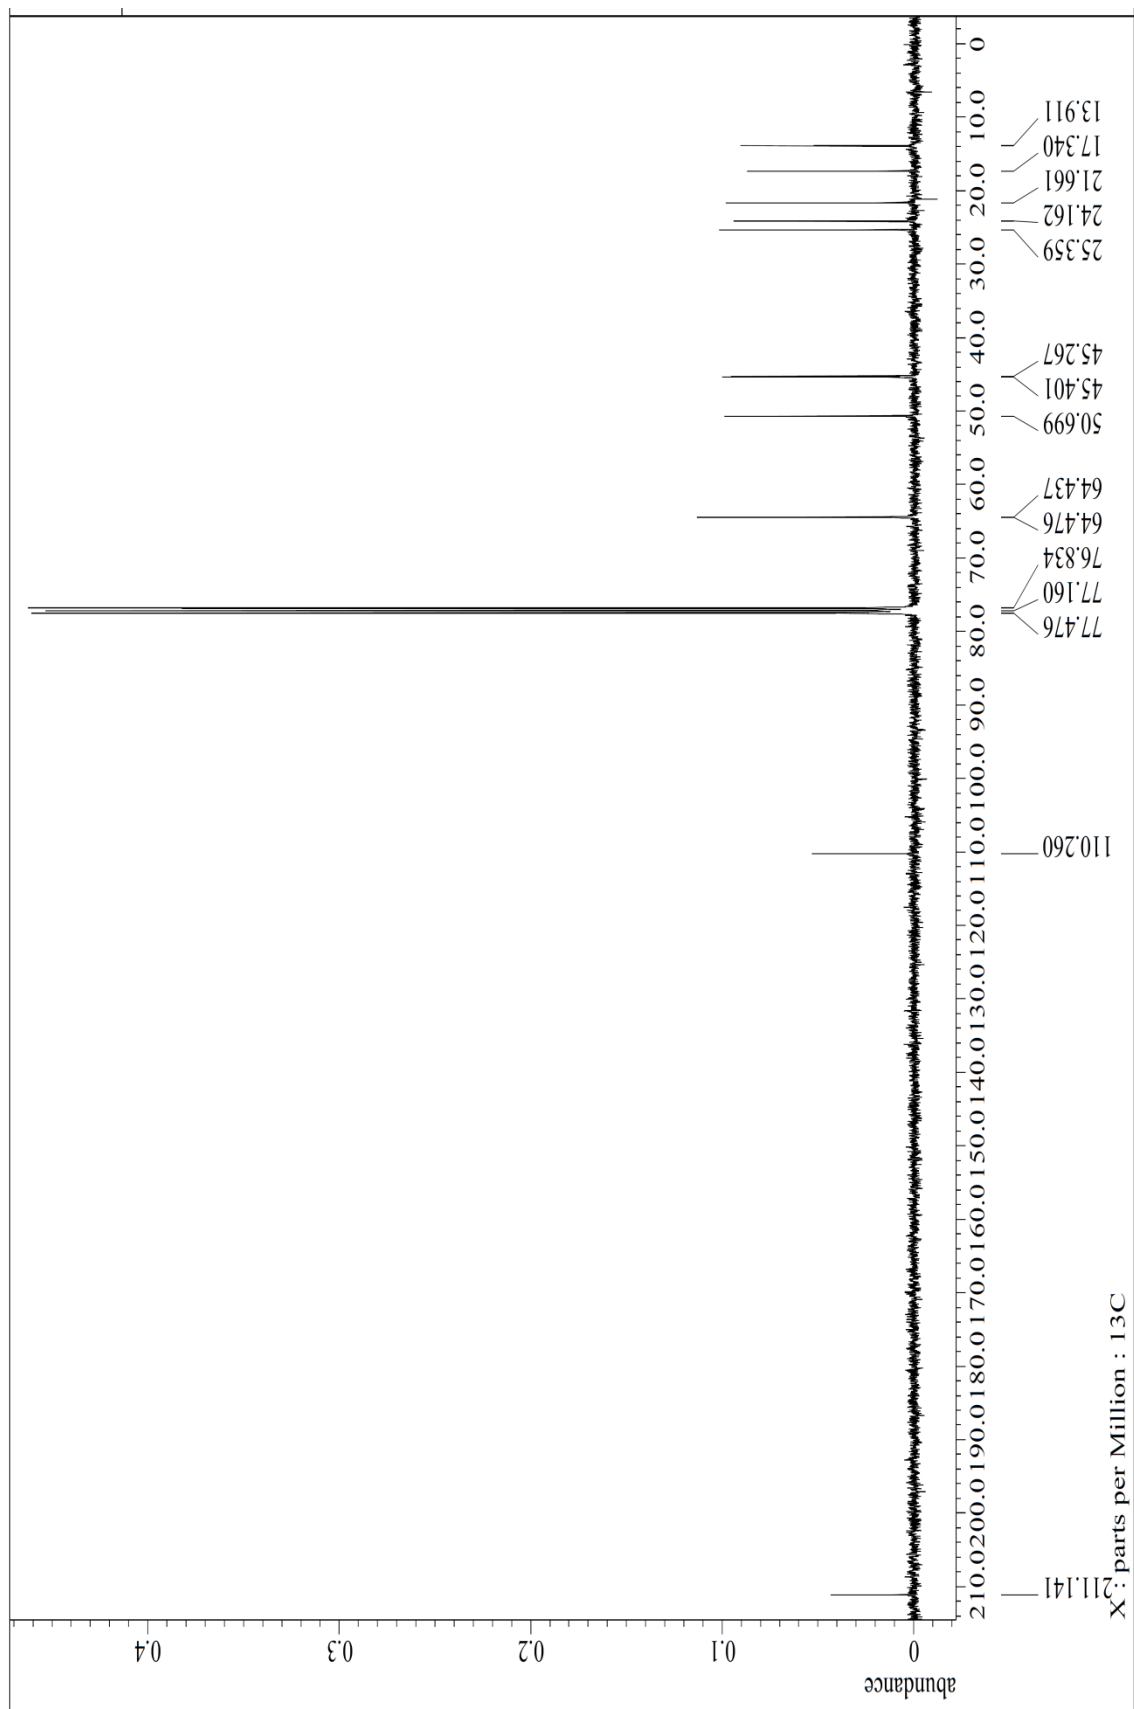

<sup>1</sup>H NMR of **3c**

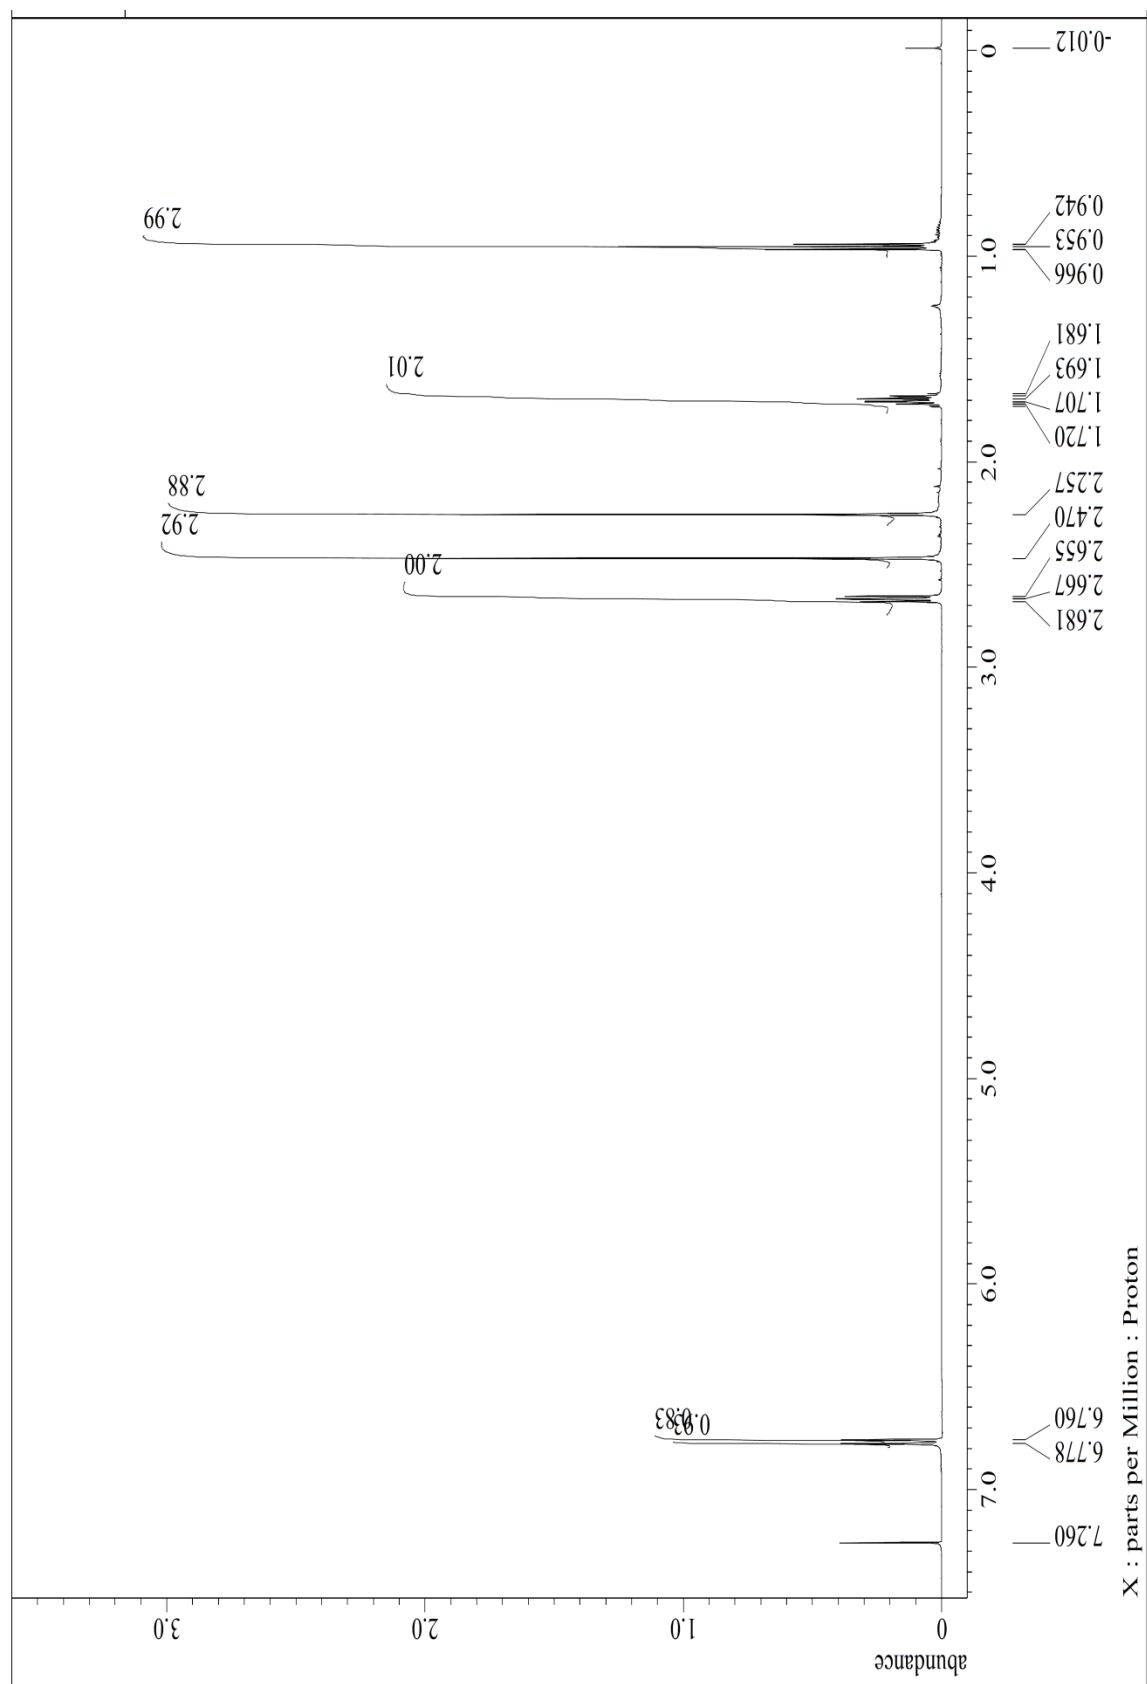

<sup>13</sup>C NMR of **3c**

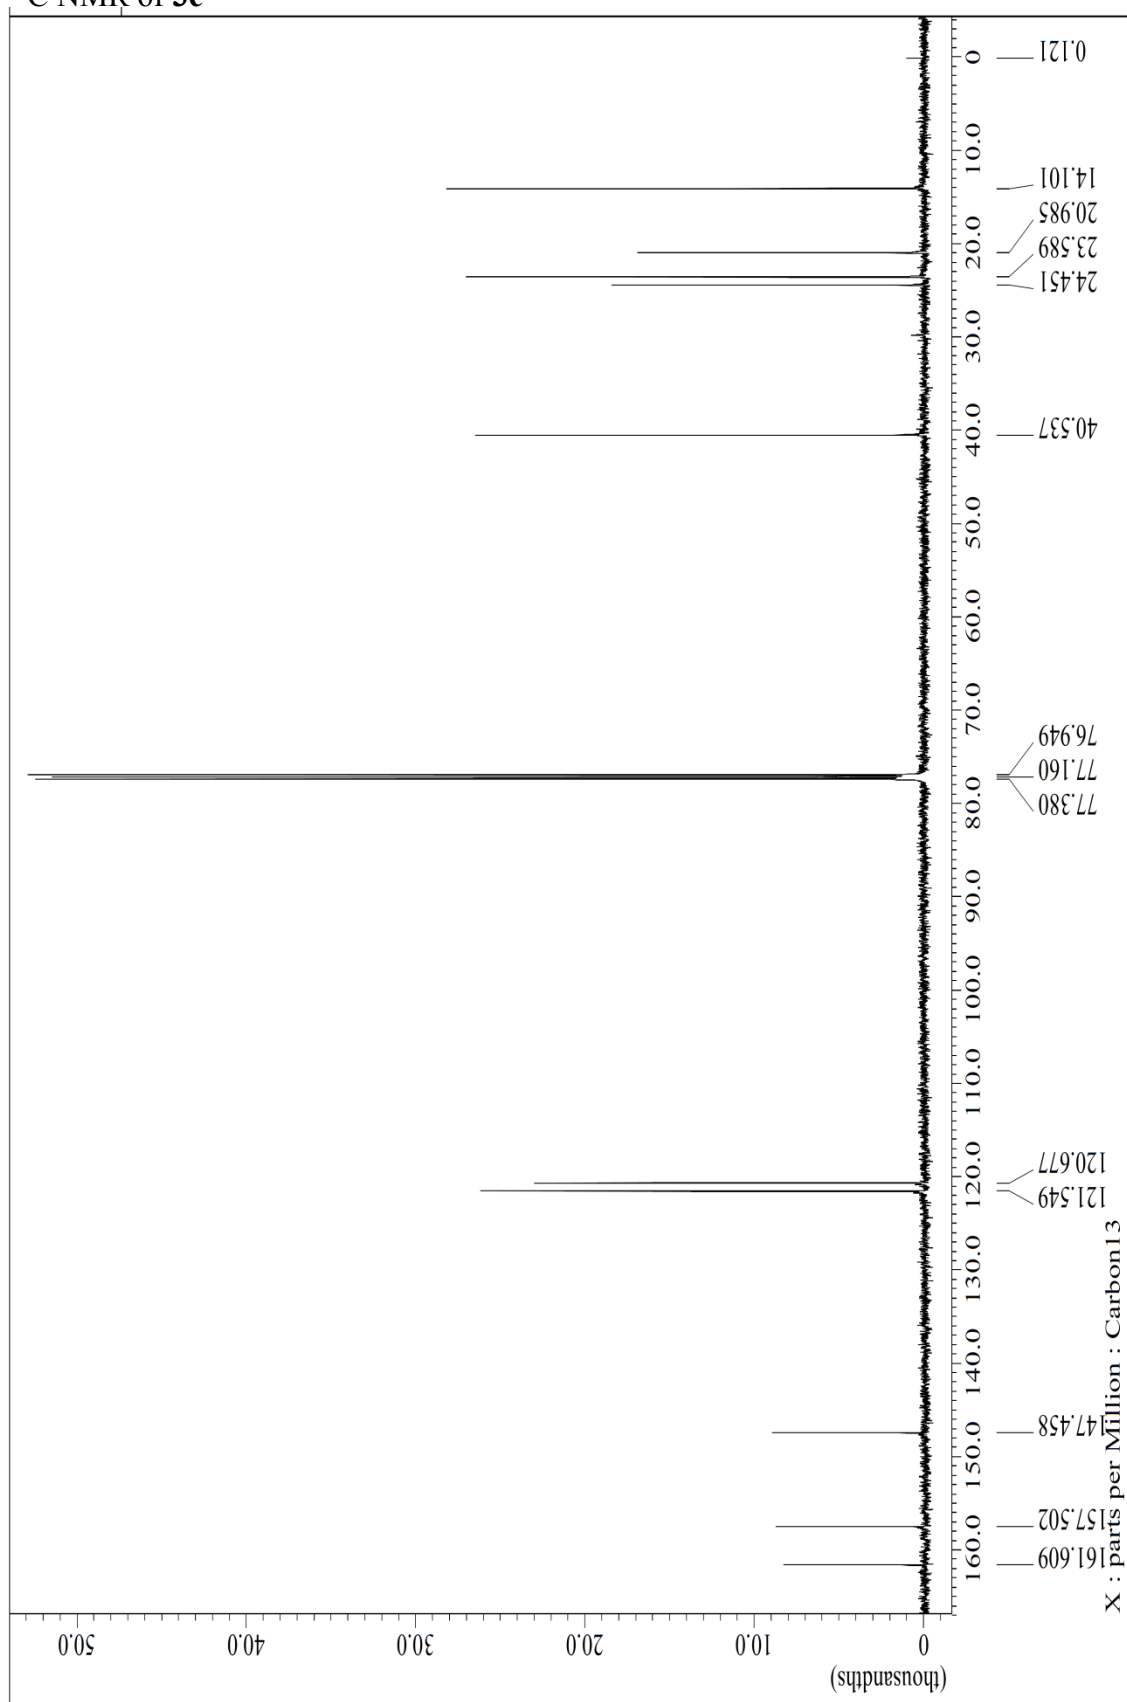



<sup>1</sup>H NMR of **4b**

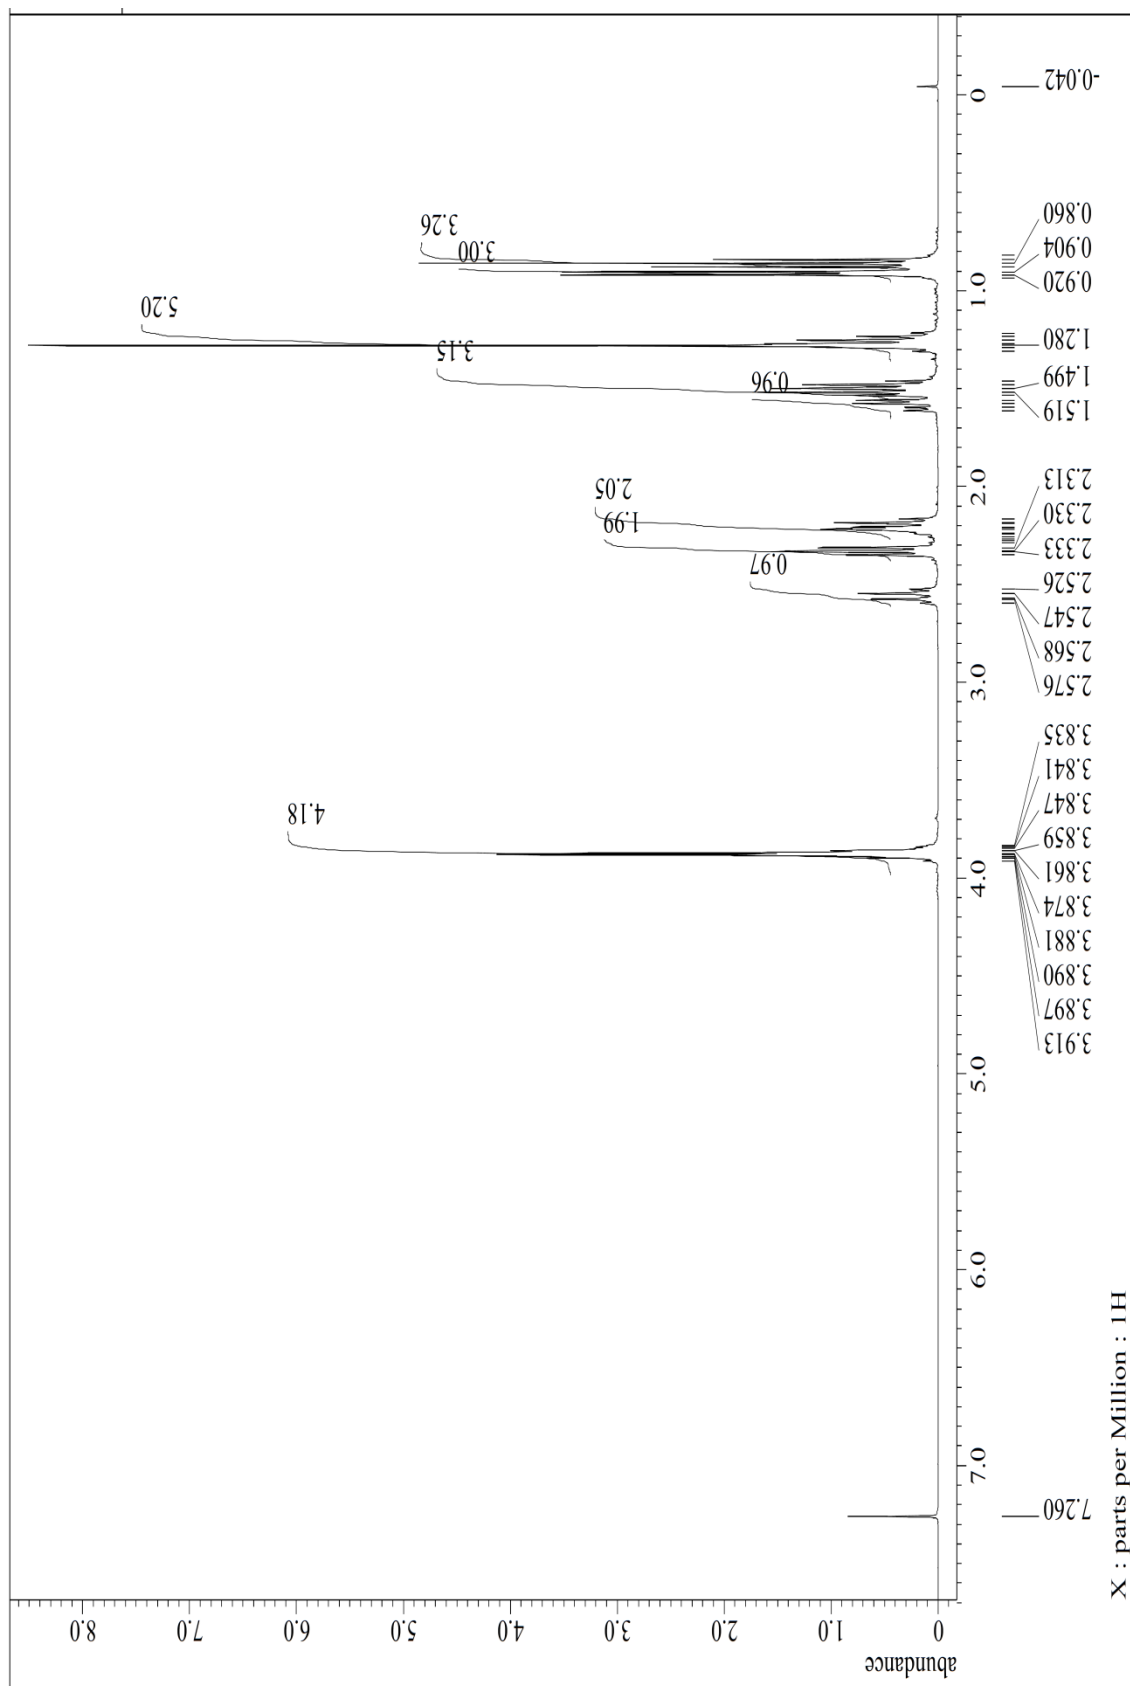

<sup>13</sup>C NMR of **4b**

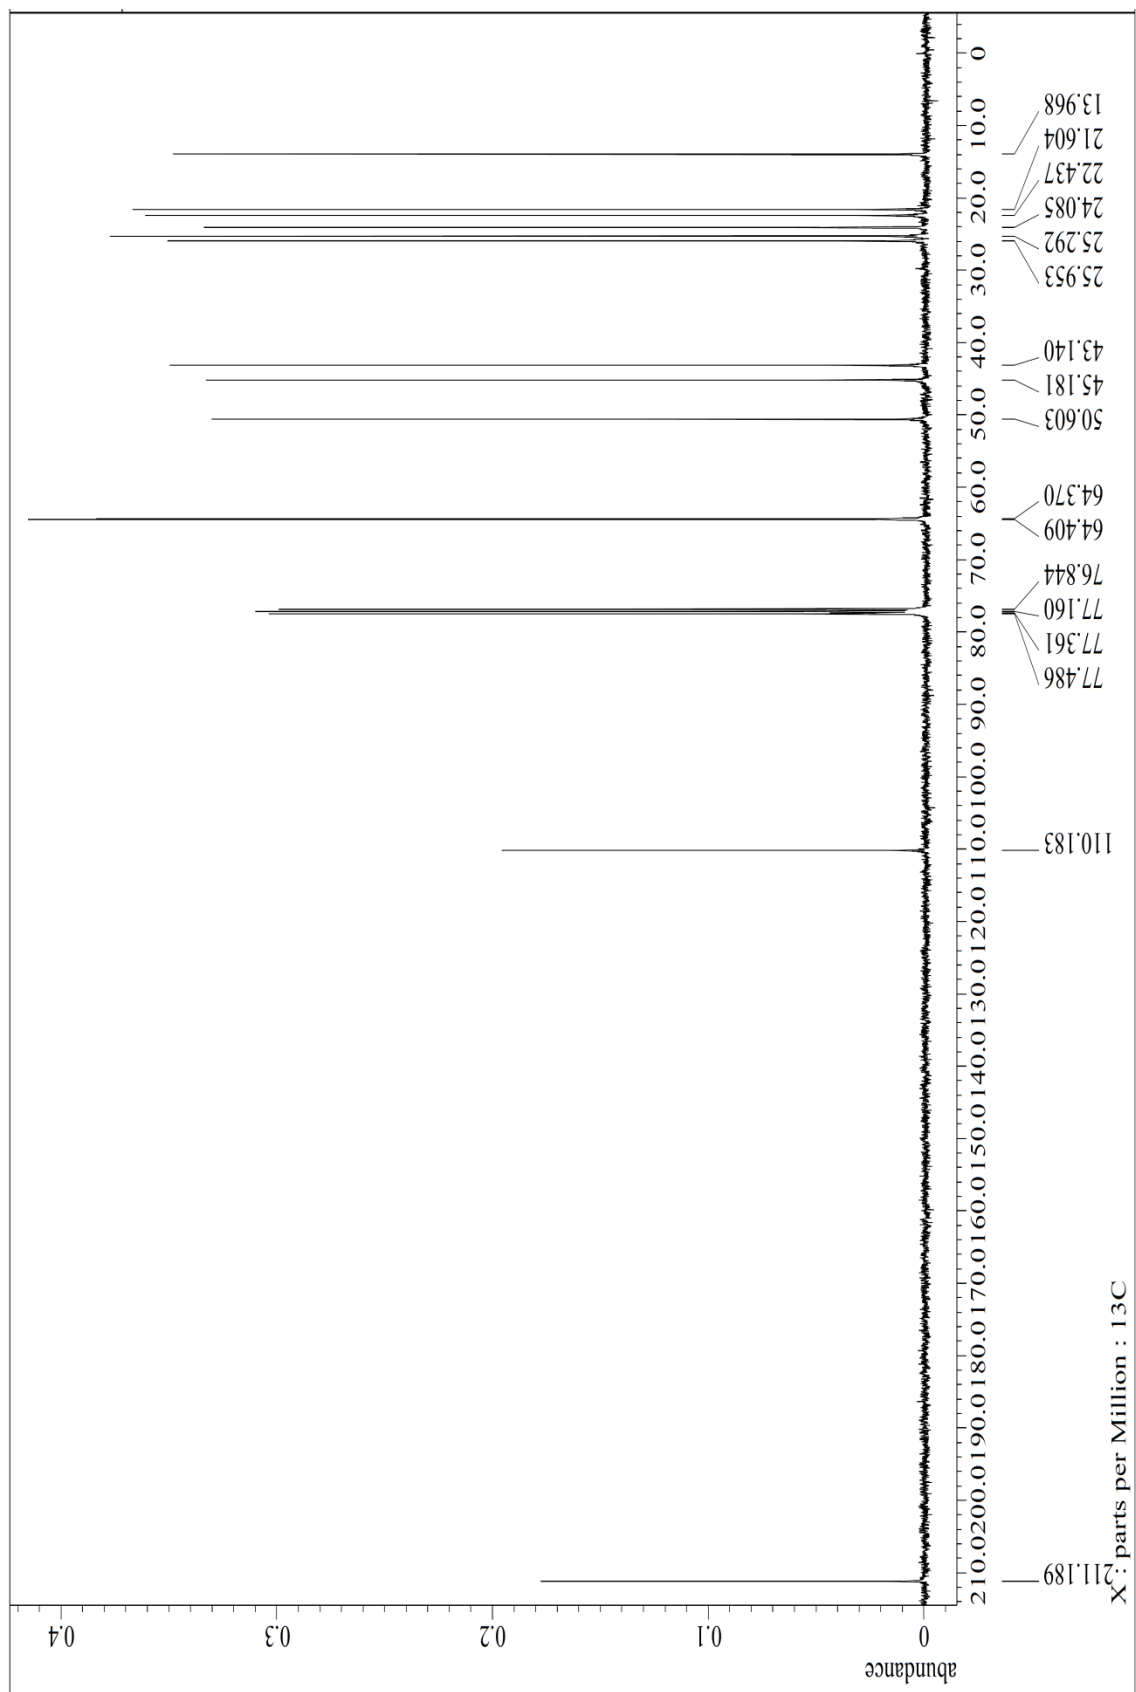

<sup>1</sup>H NMR of **4d**

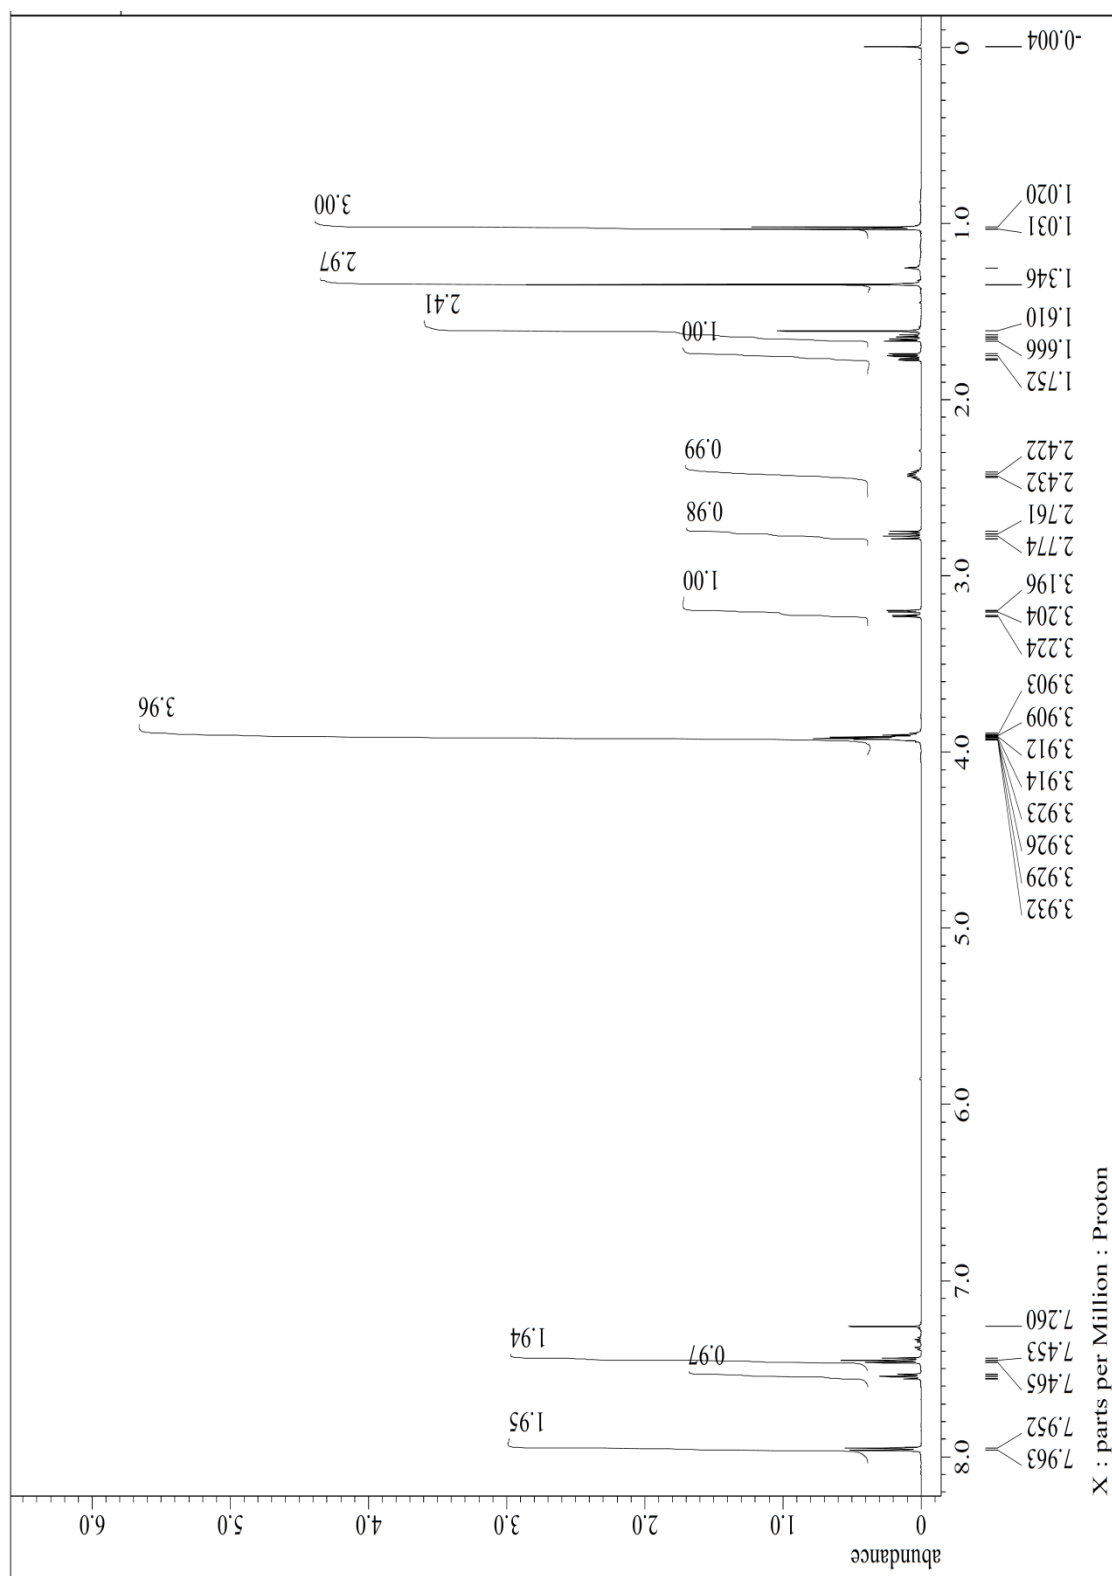

$^{13}\text{C}$  NMR of **4d**

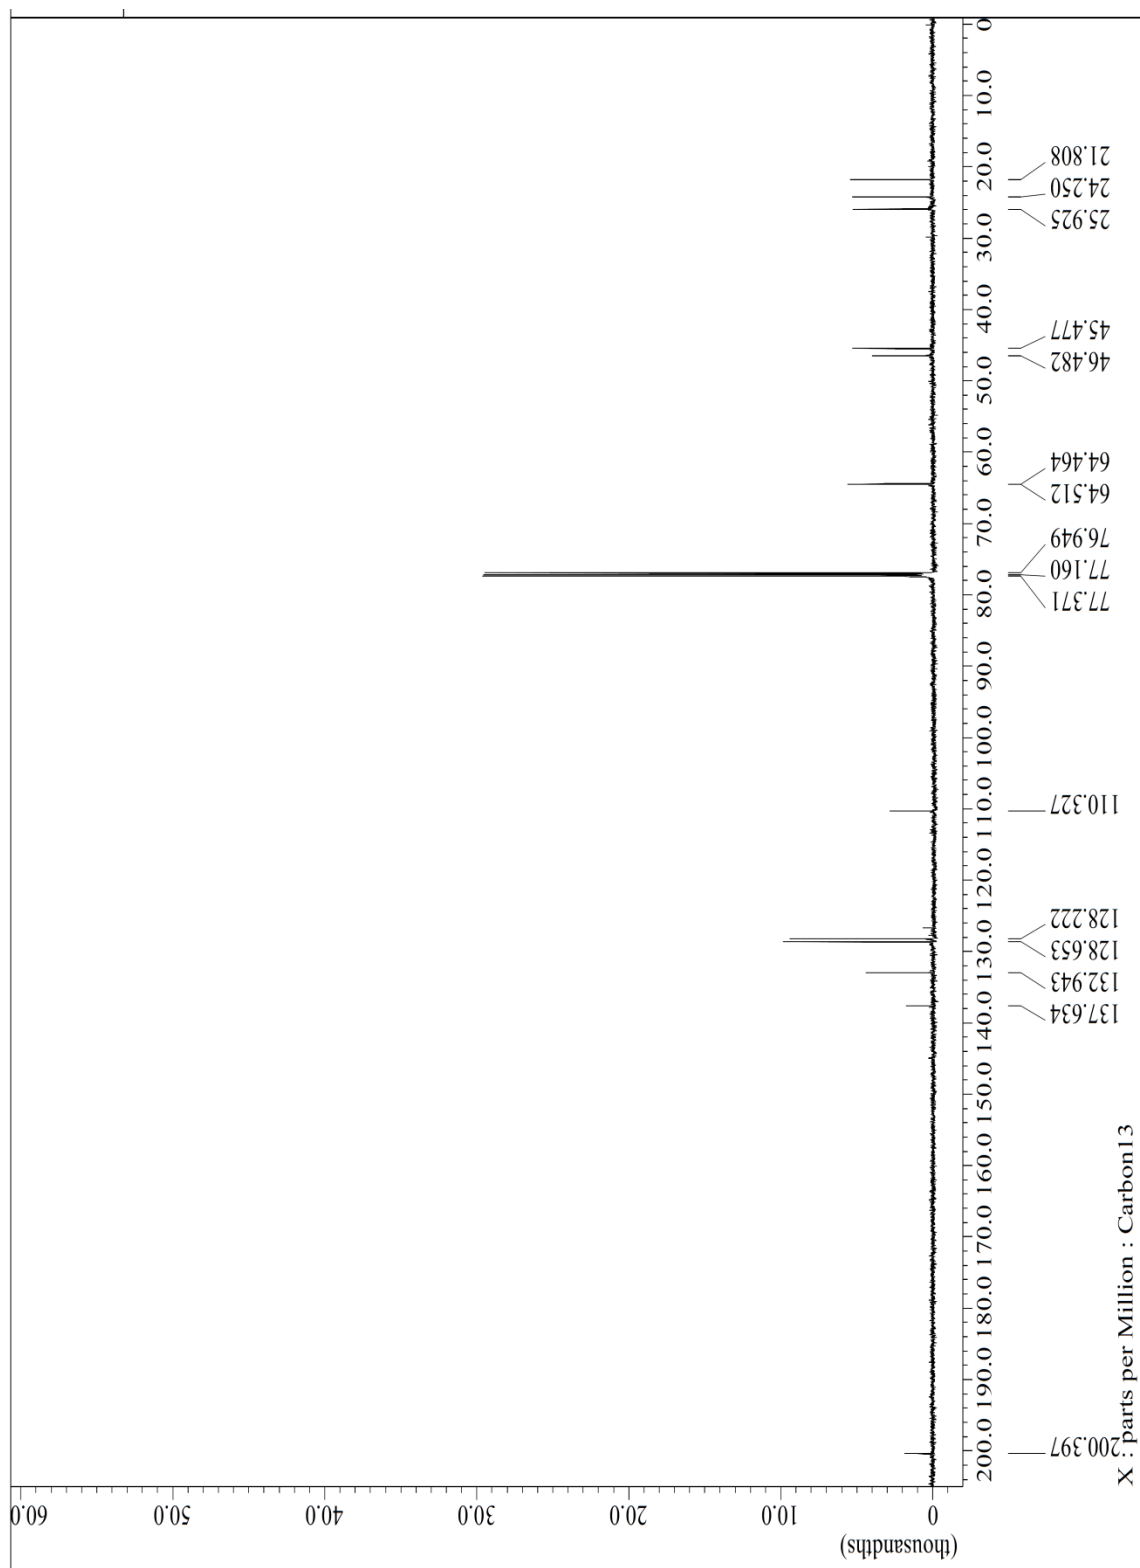

<sup>1</sup>H NMR of **3d**

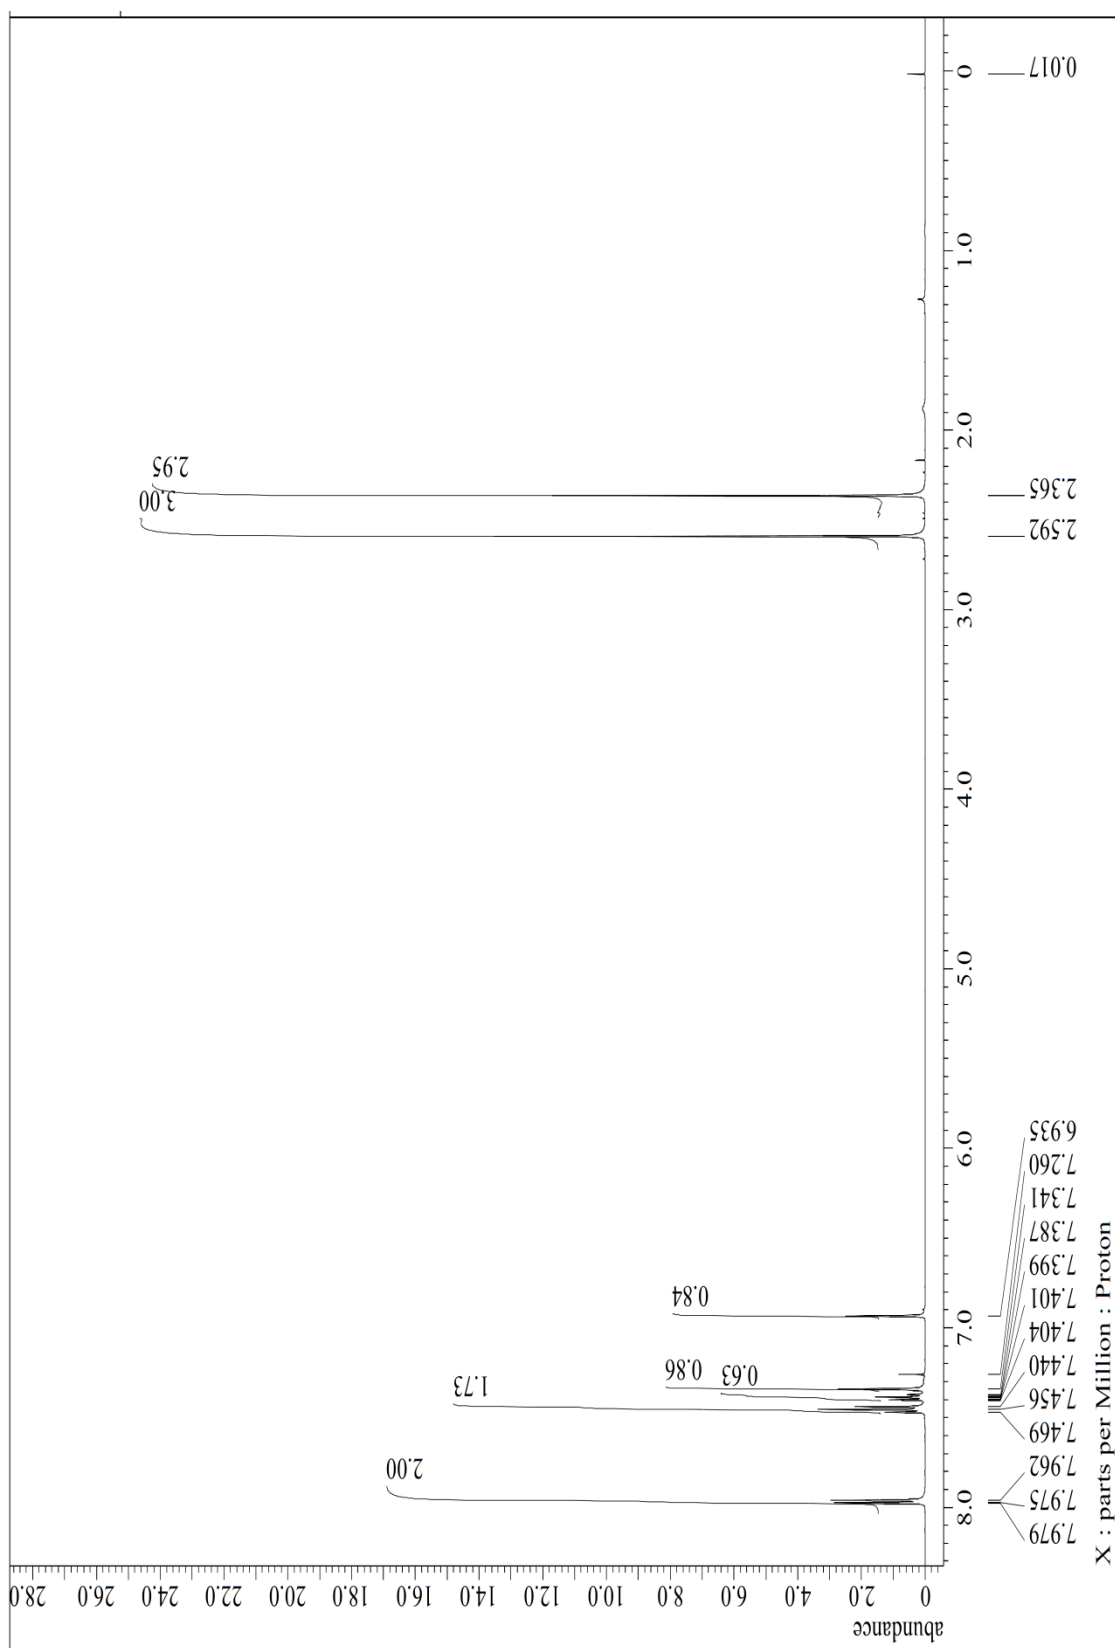

$^{13}\text{C}$  NMR of **3d**

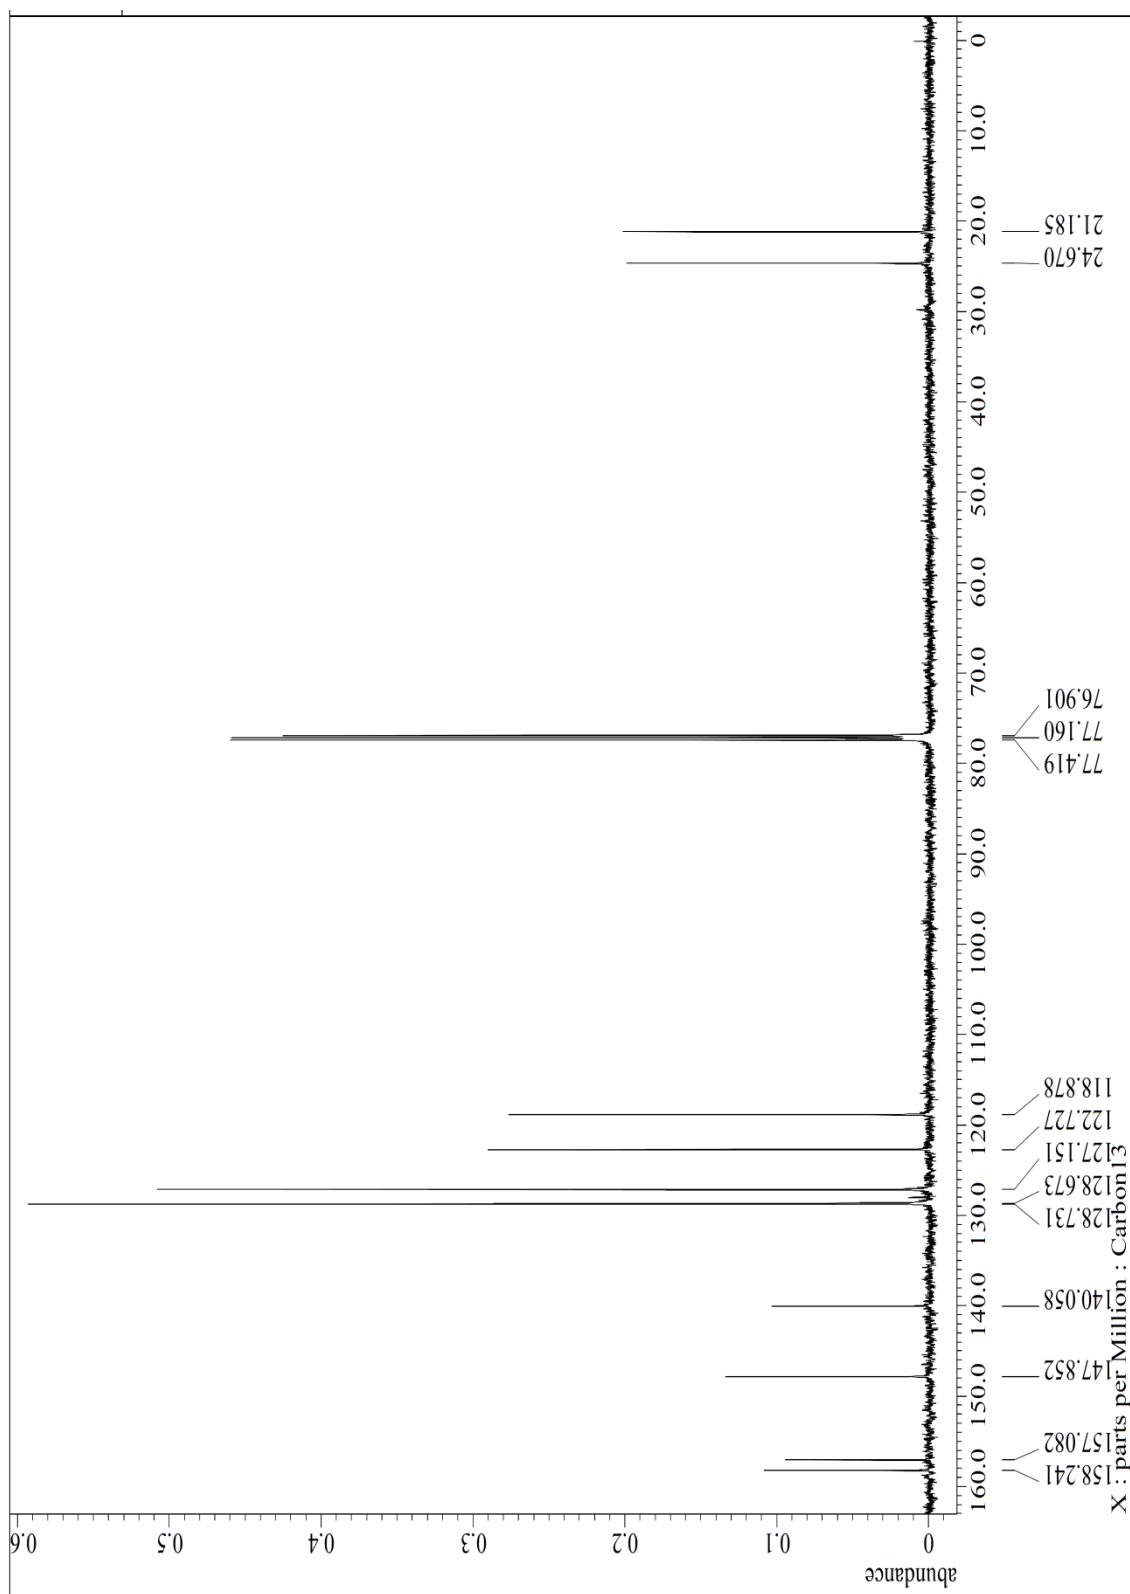

<sup>1</sup>H NMR of **4e**

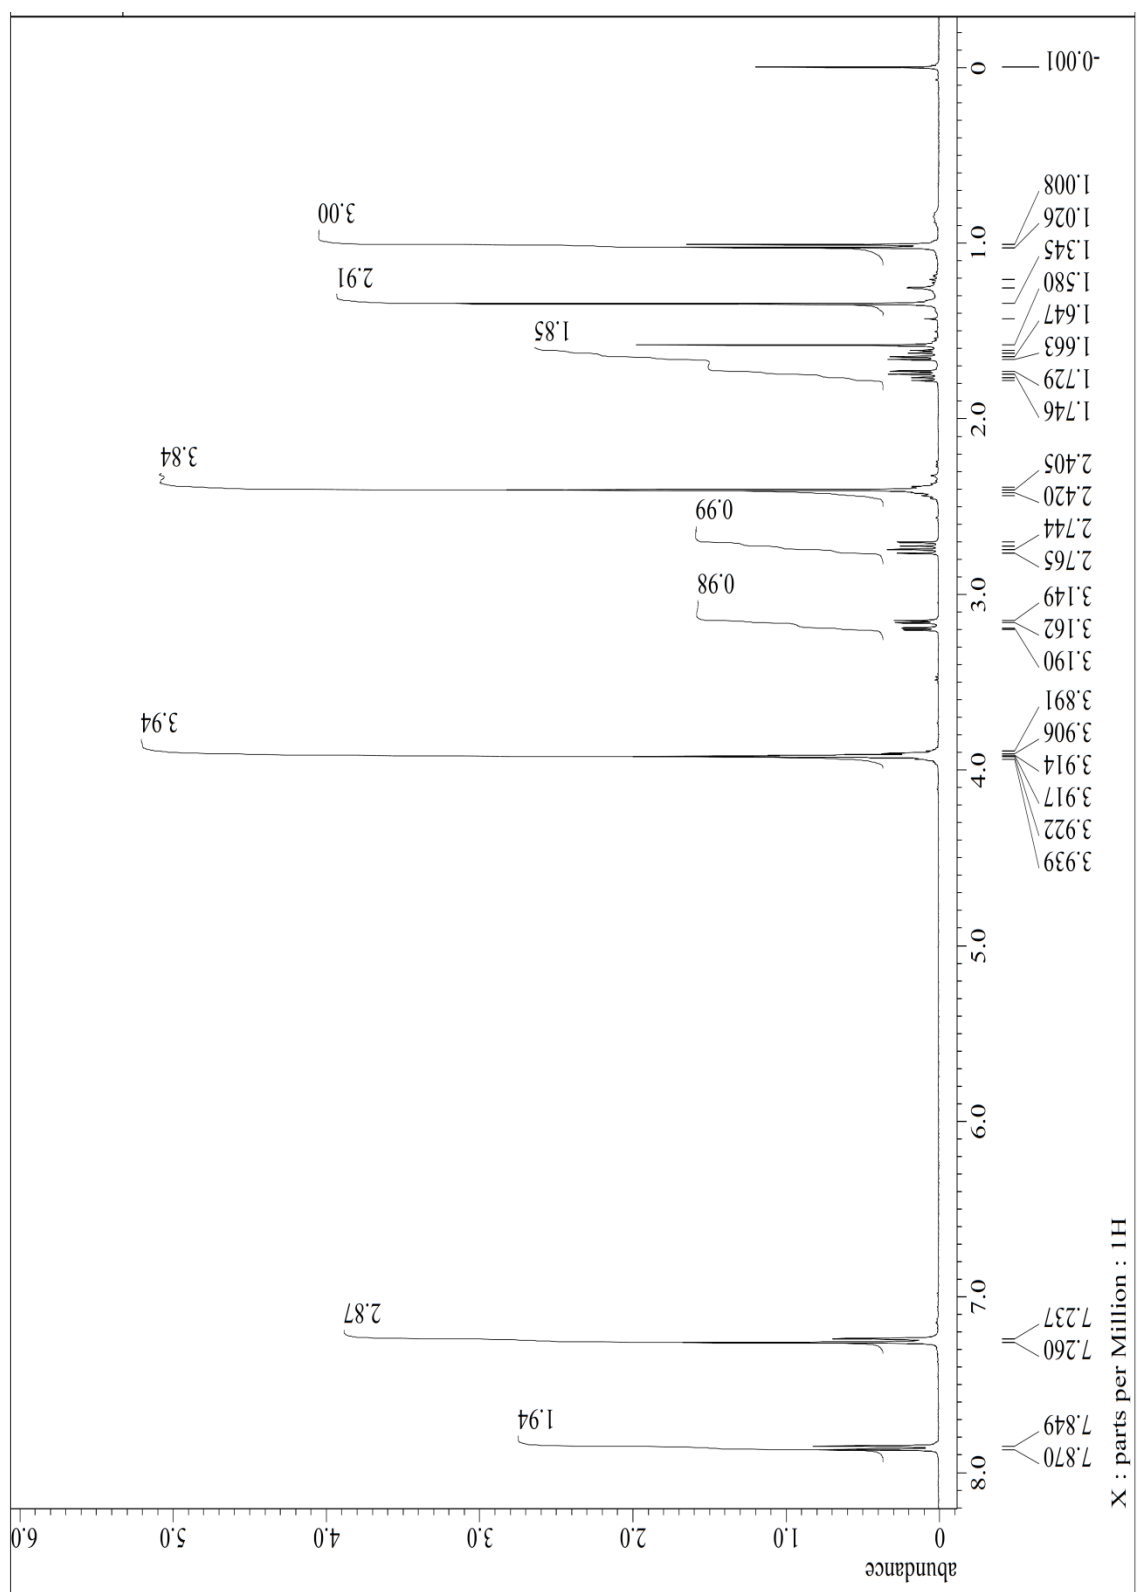

$^{13}\text{C}$  NMR of **4e**

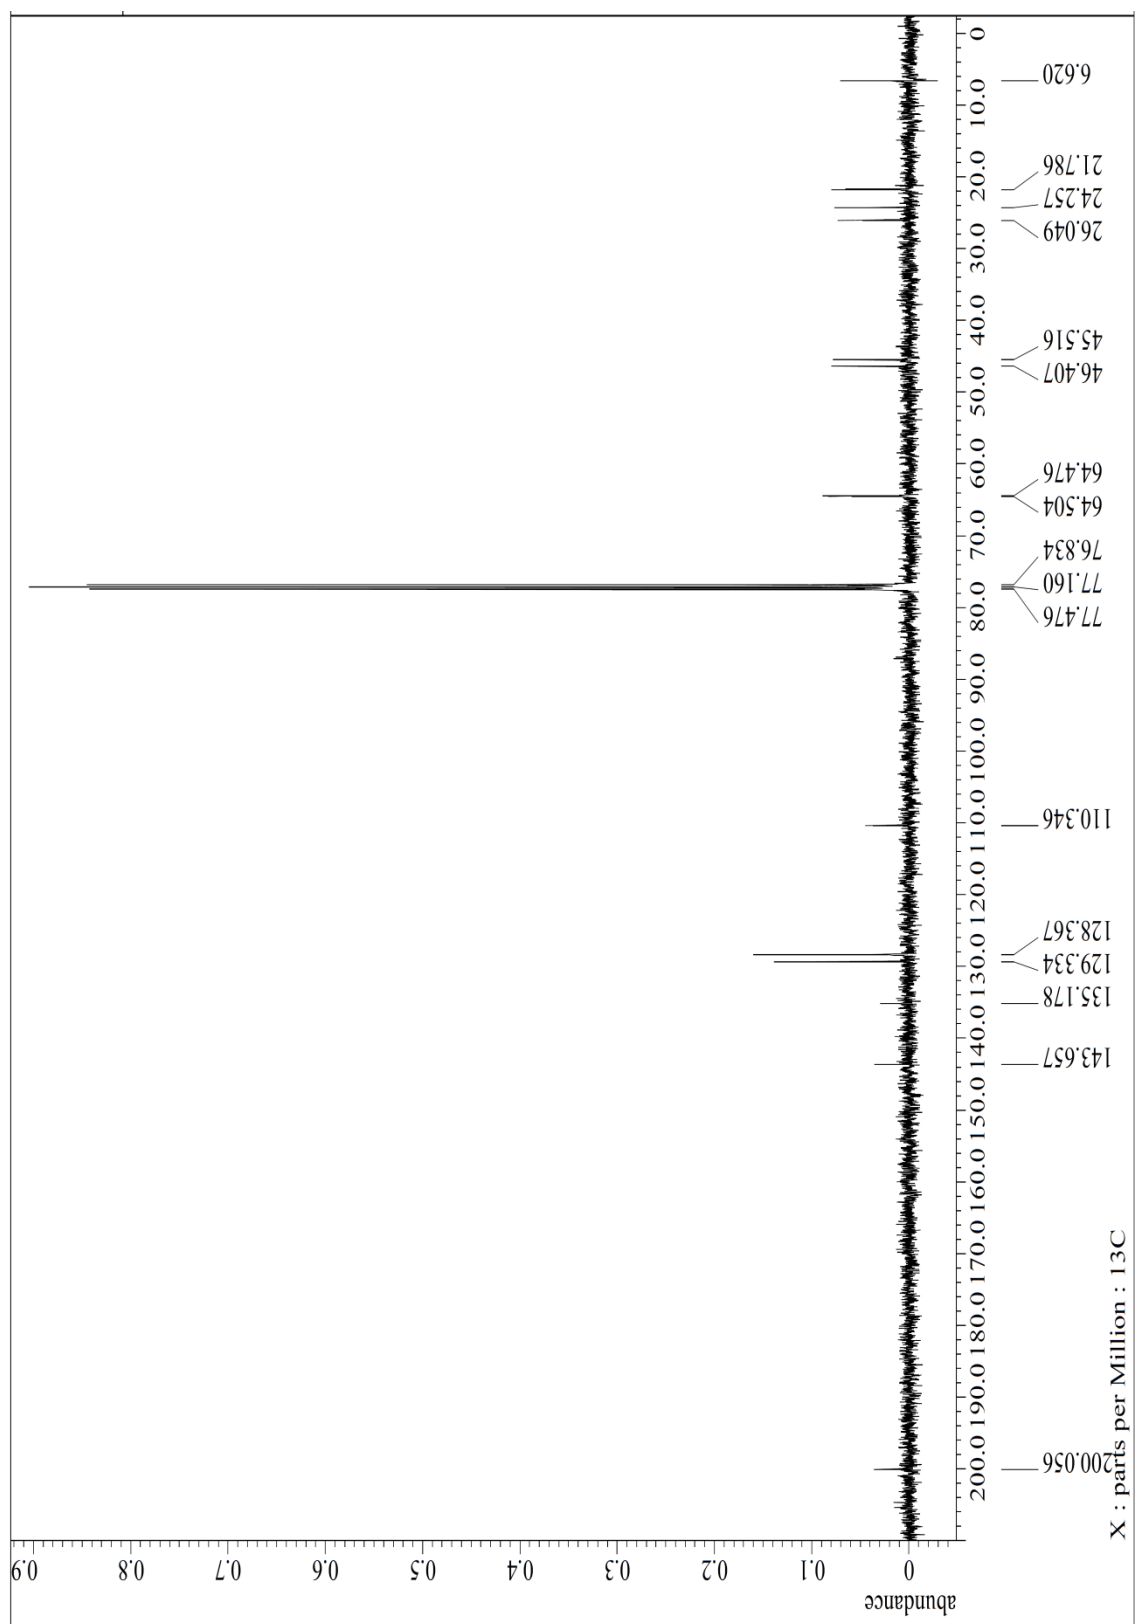



$^1\text{H}$  NMR of **3e**

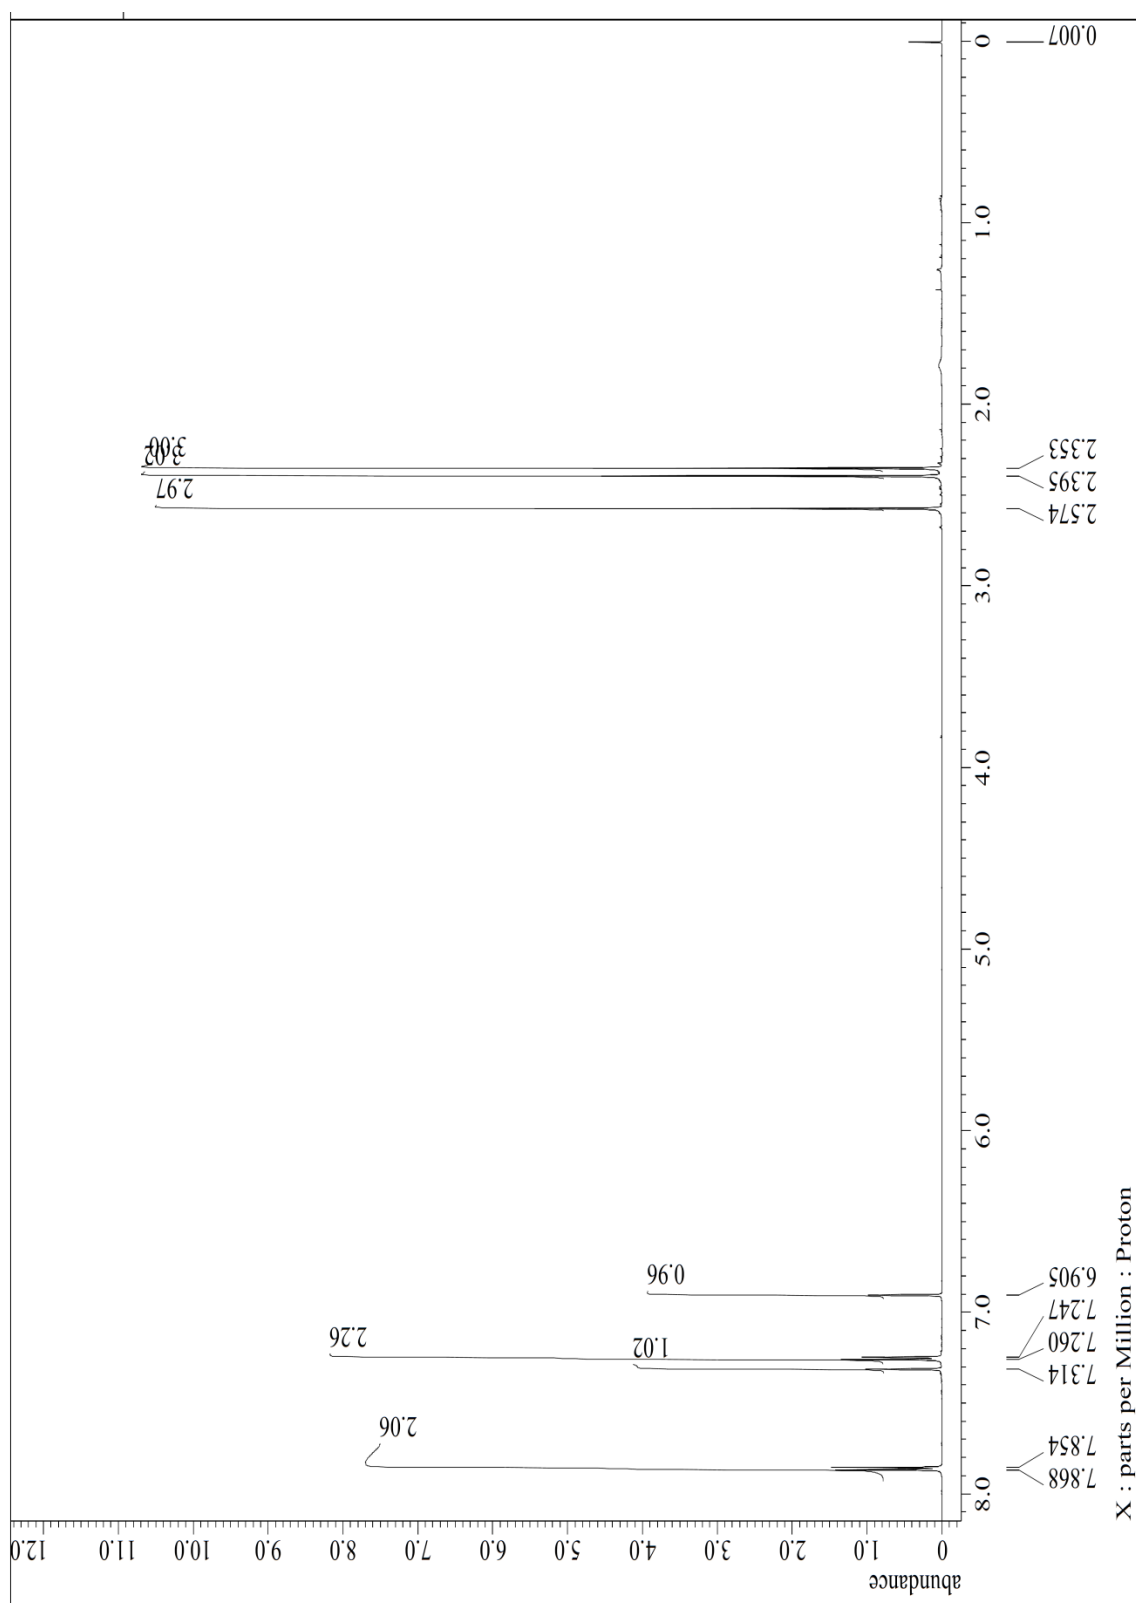

$^{13}\text{C}$  NMR of **3e**

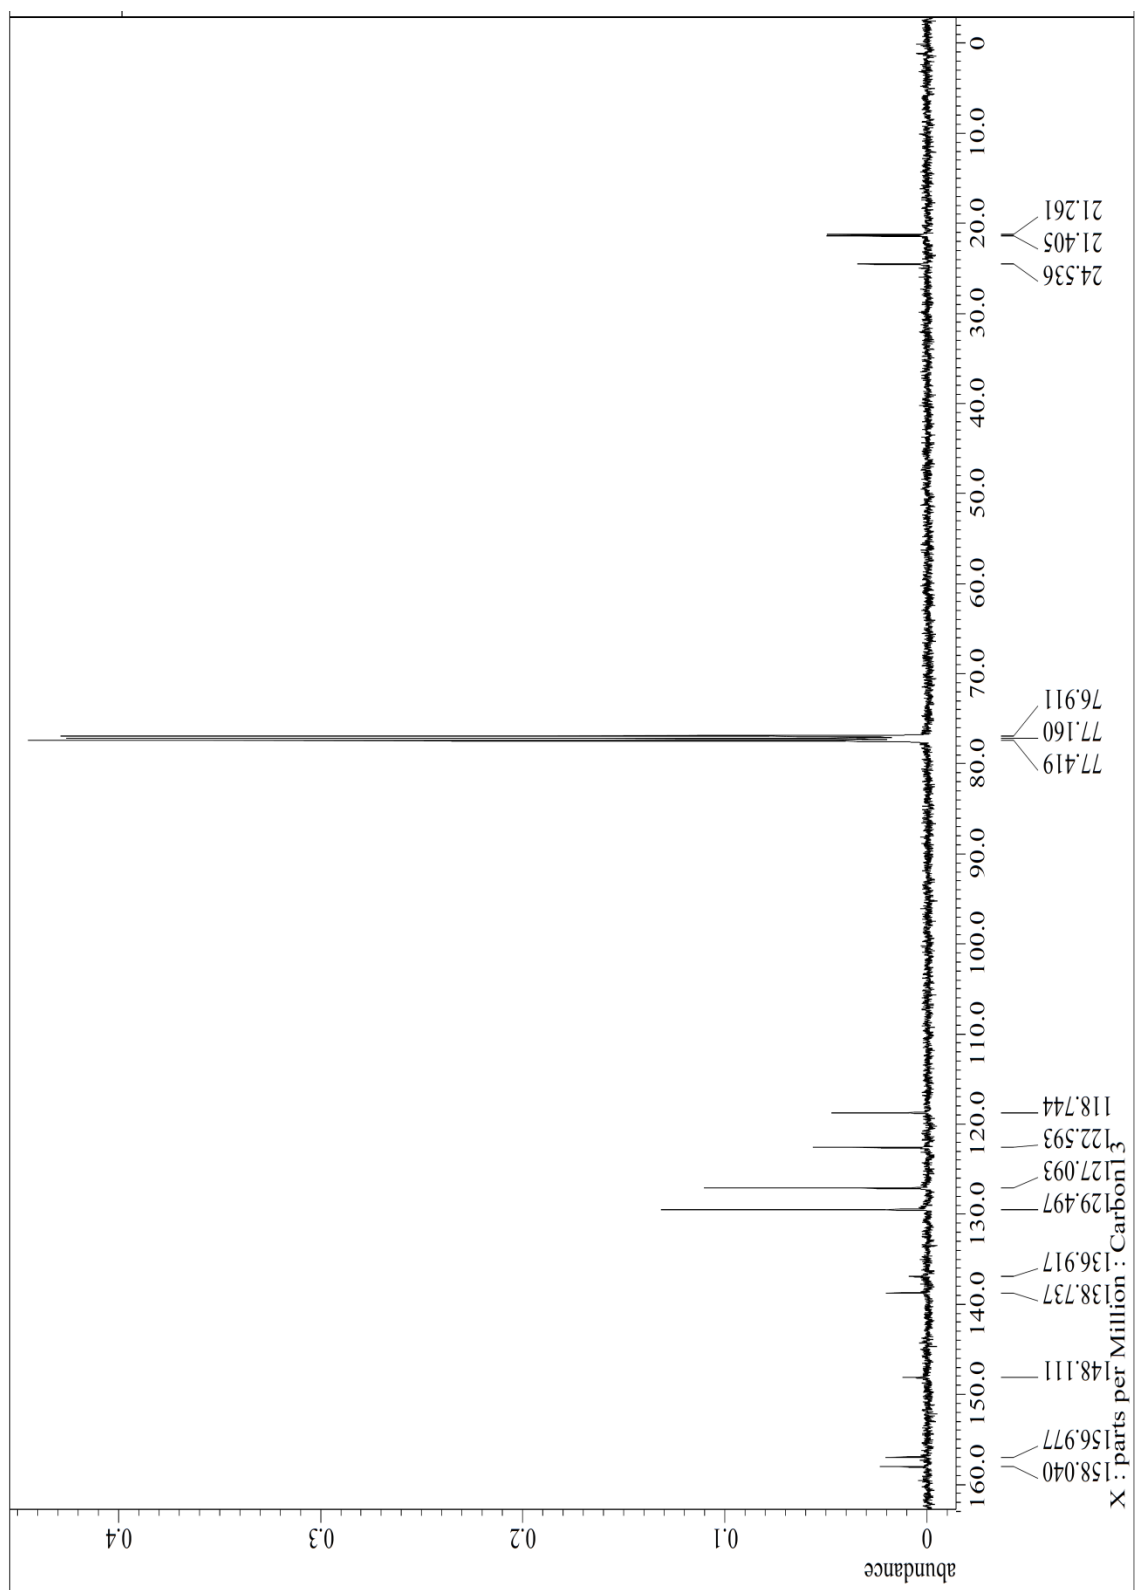

$^1\text{H}$  NMR of **4f**

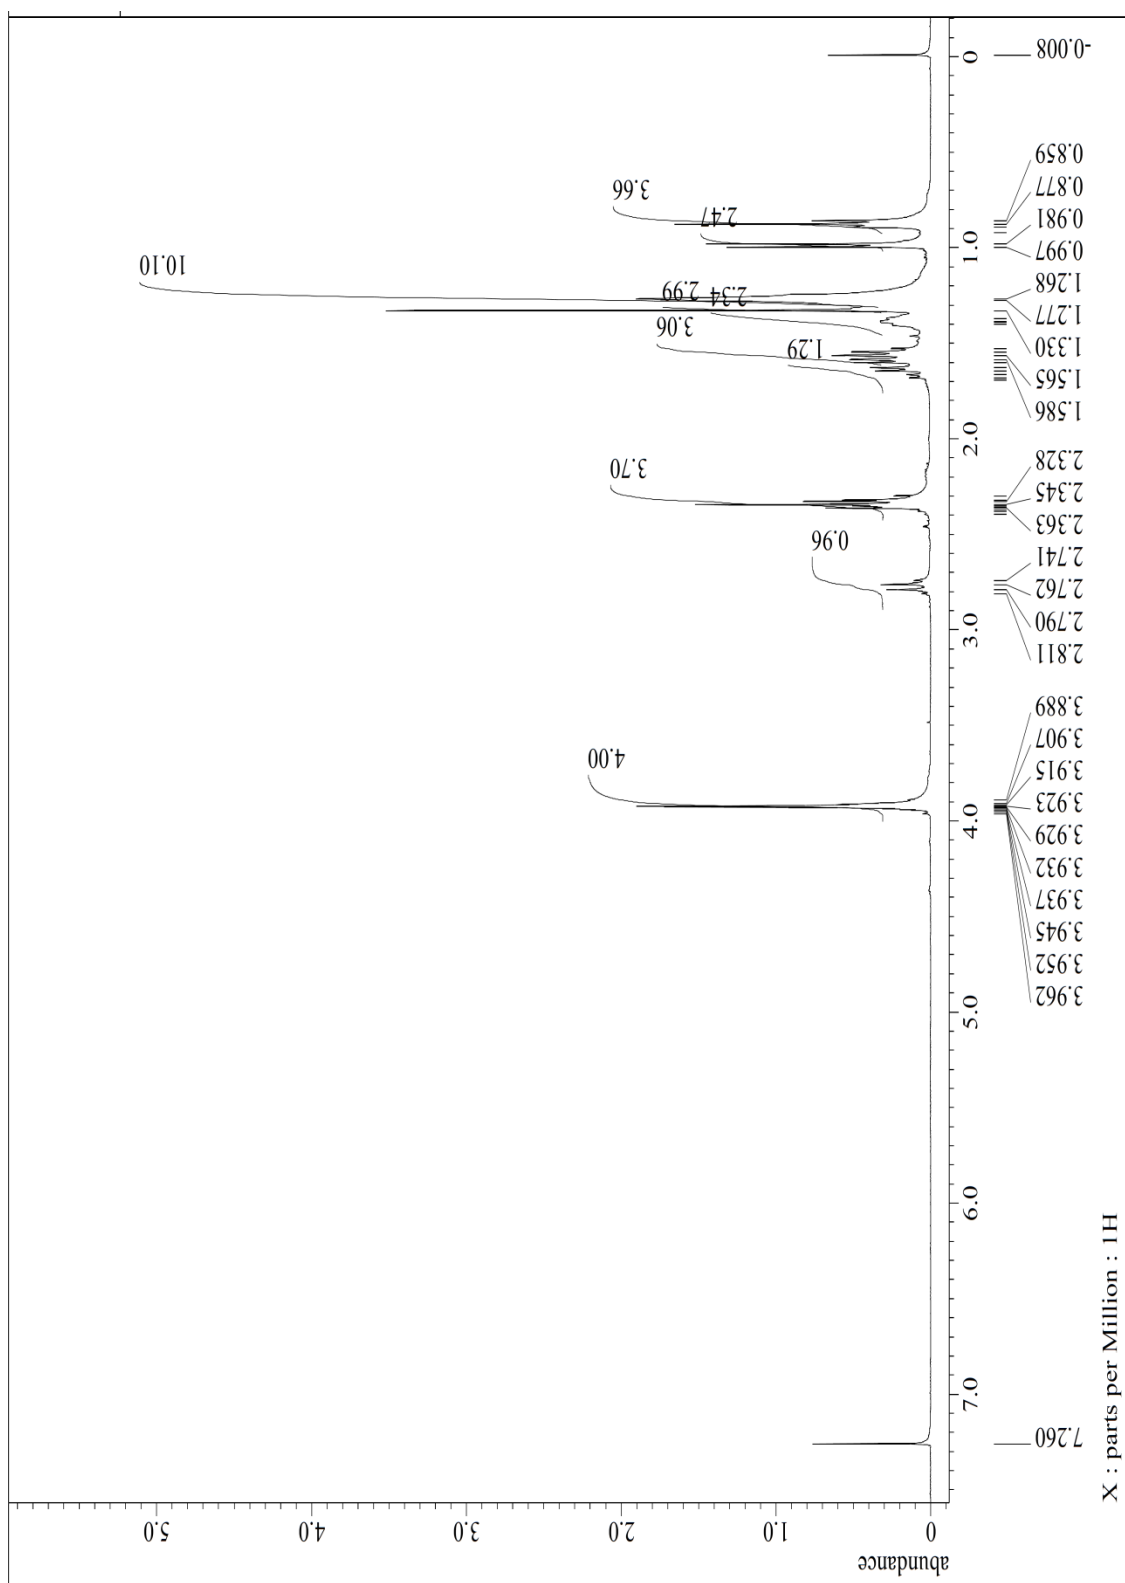

$^{13}\text{C}$  NMR of **4f**

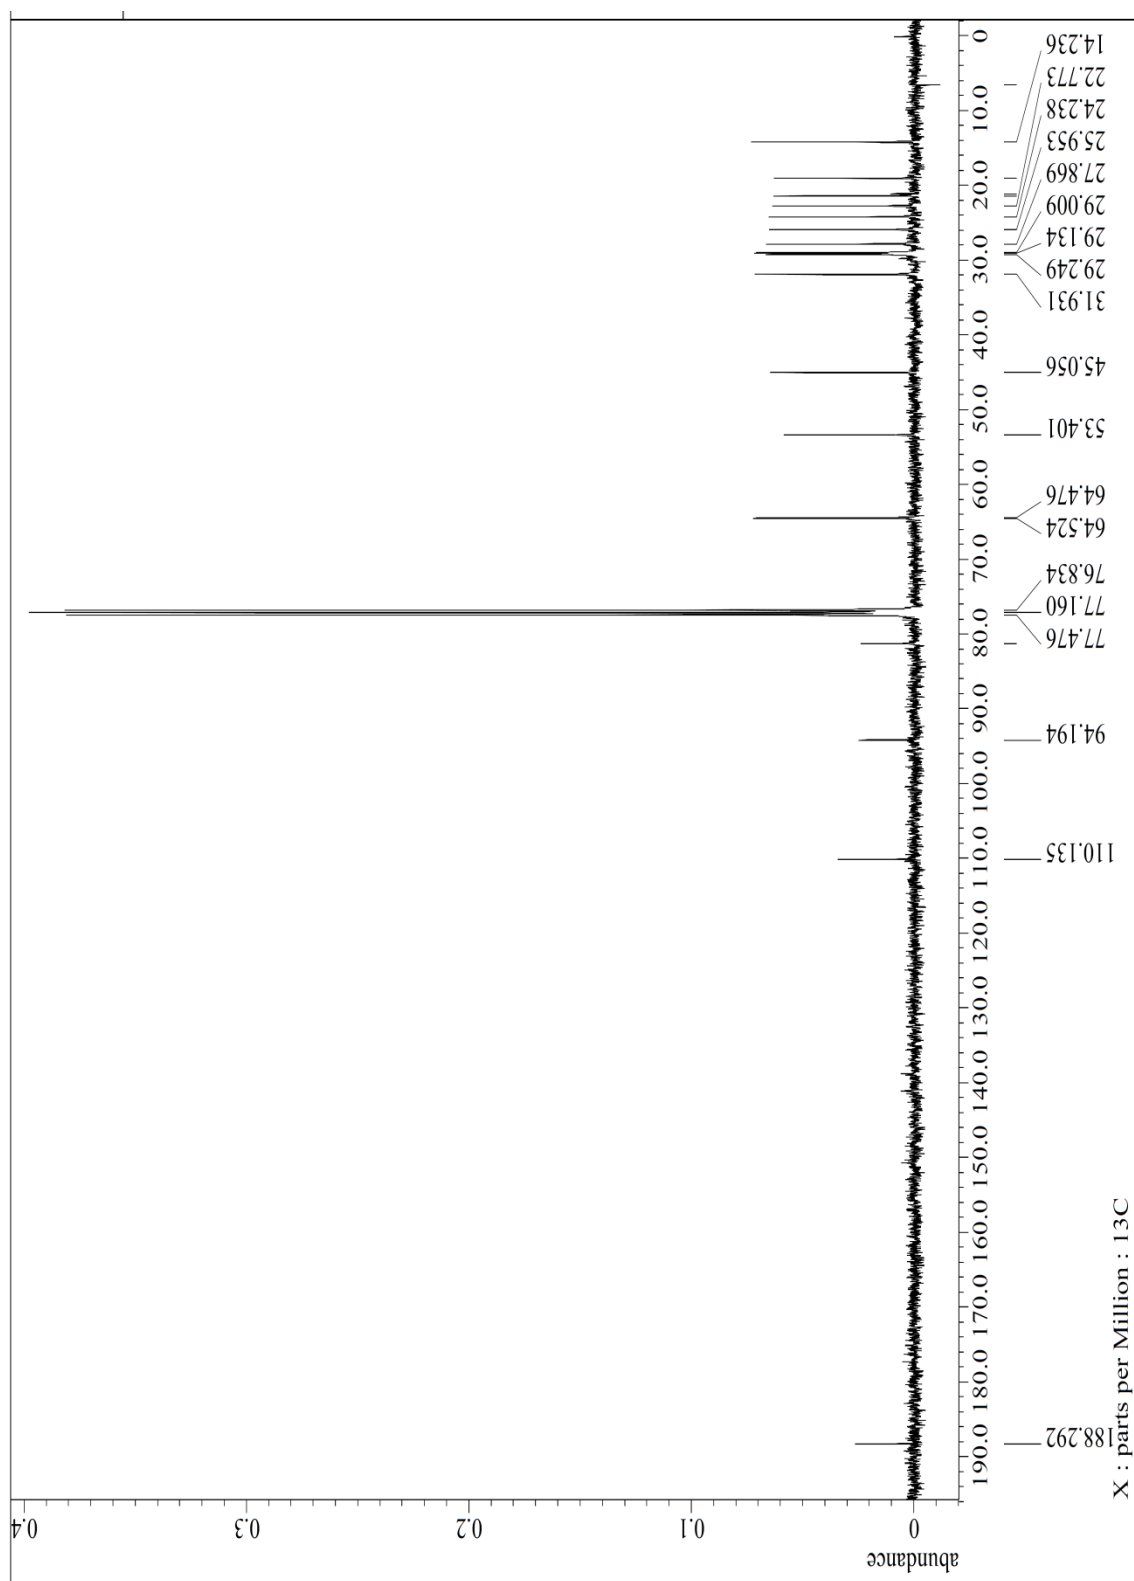

$^1\text{H}$  NMR of **3f**

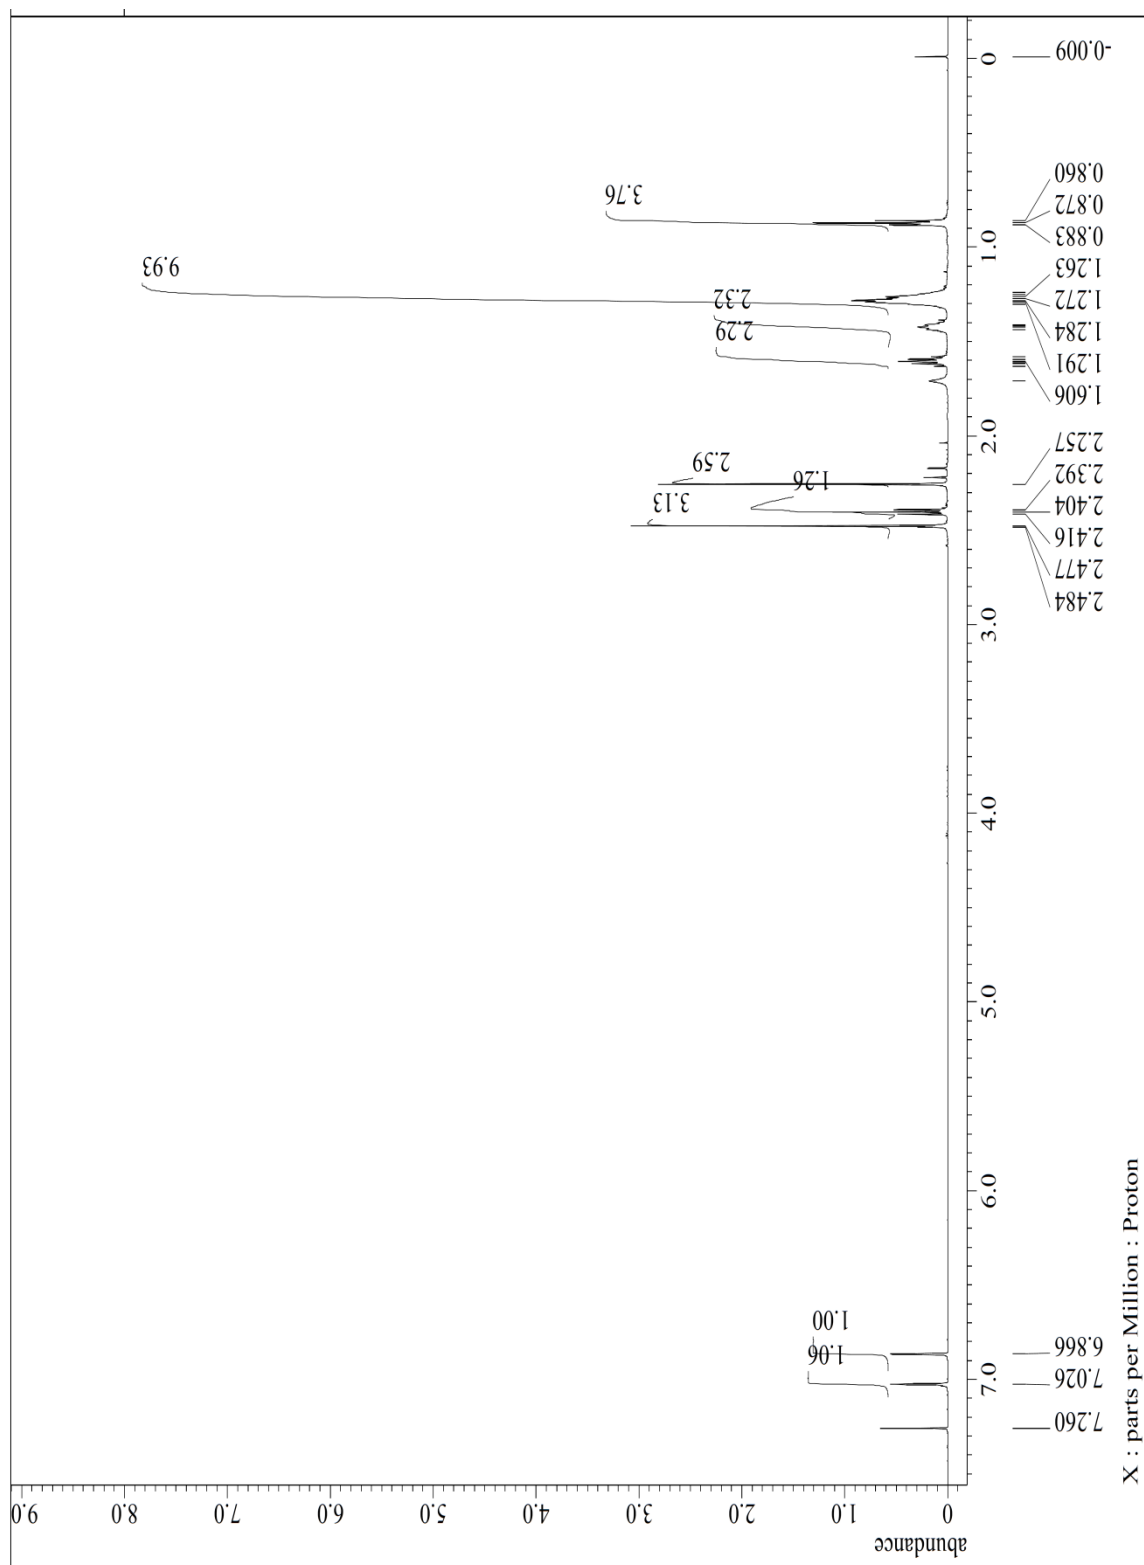

$^{13}\text{C}$  NMR of **3f**

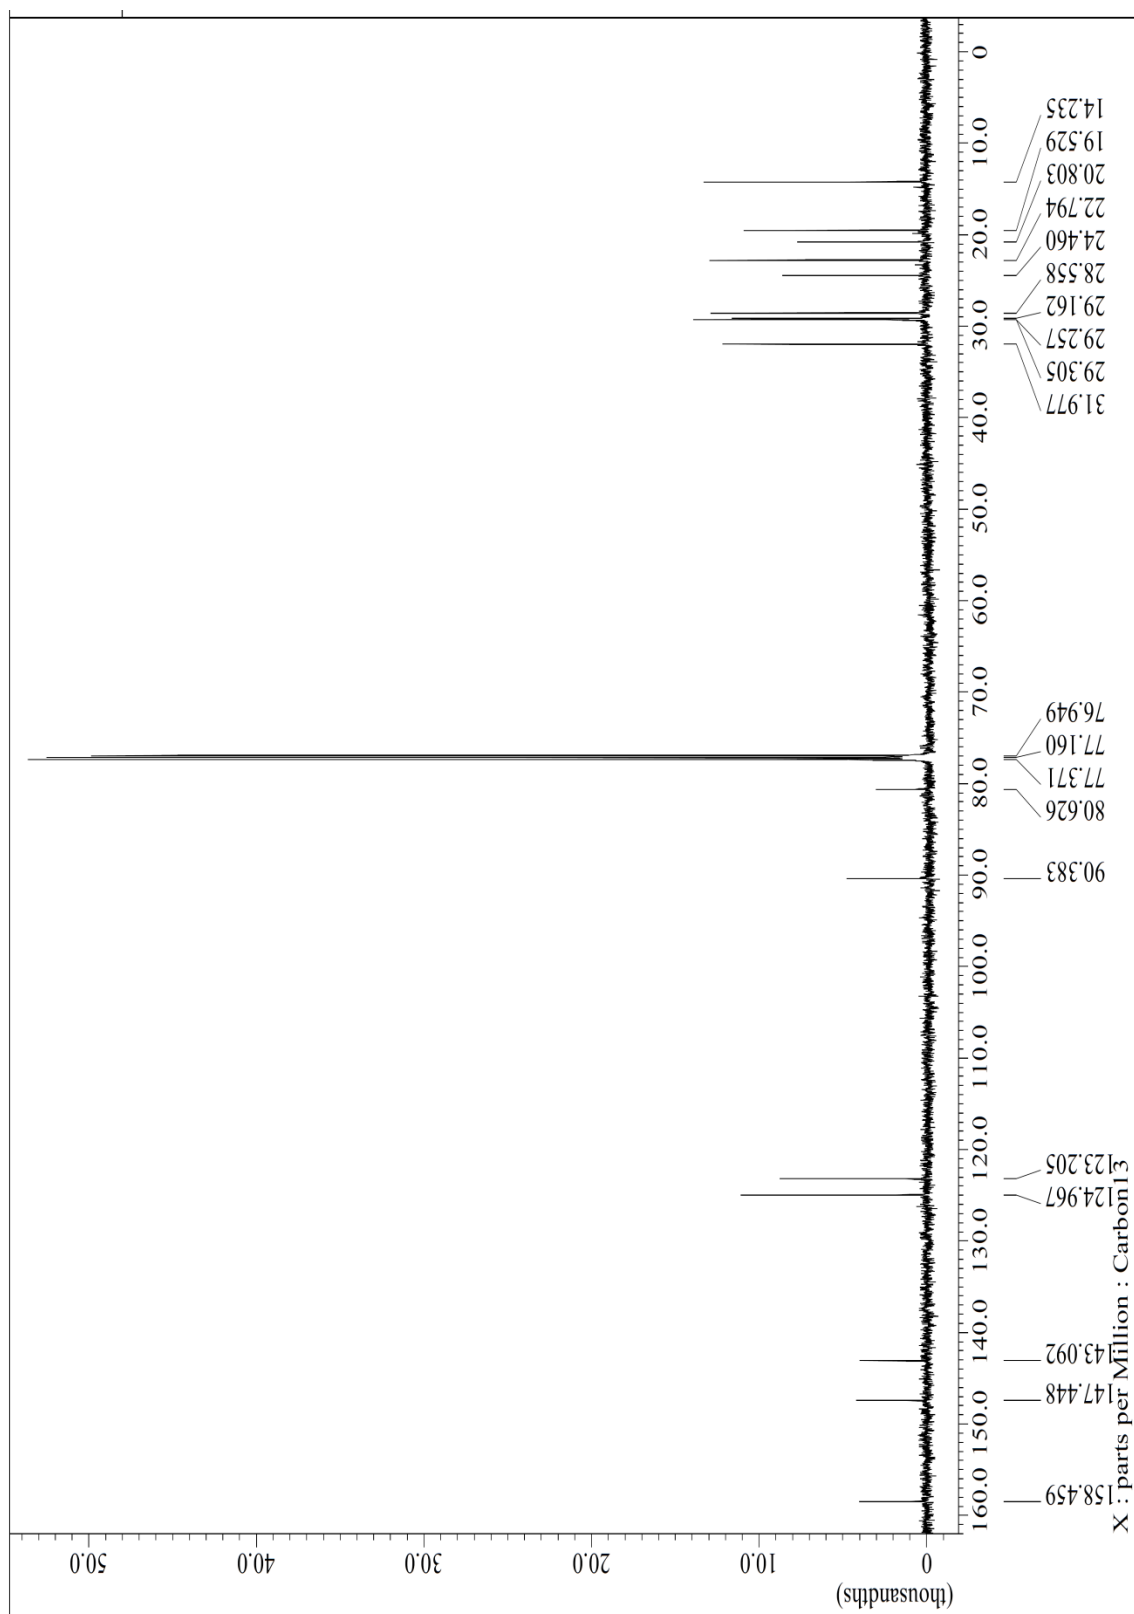

<sup>1</sup>H NMR of **4g**

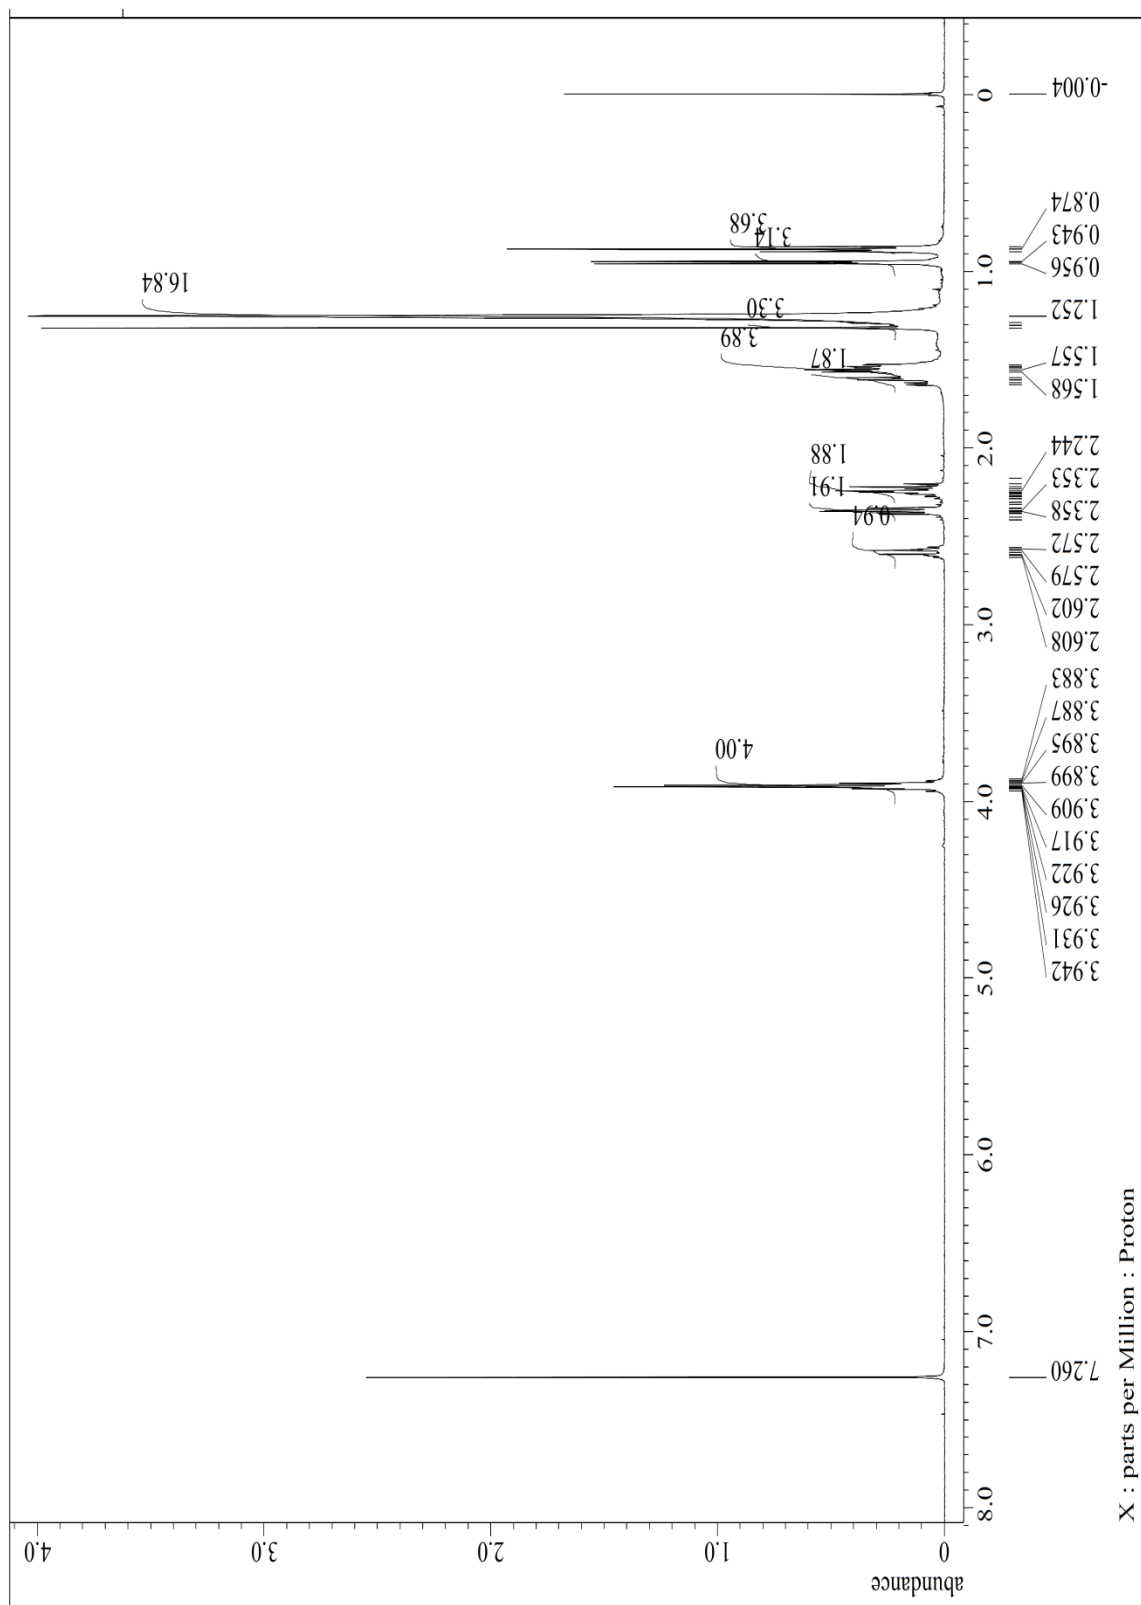

$^{13}\text{C}$  NMR of **4g**

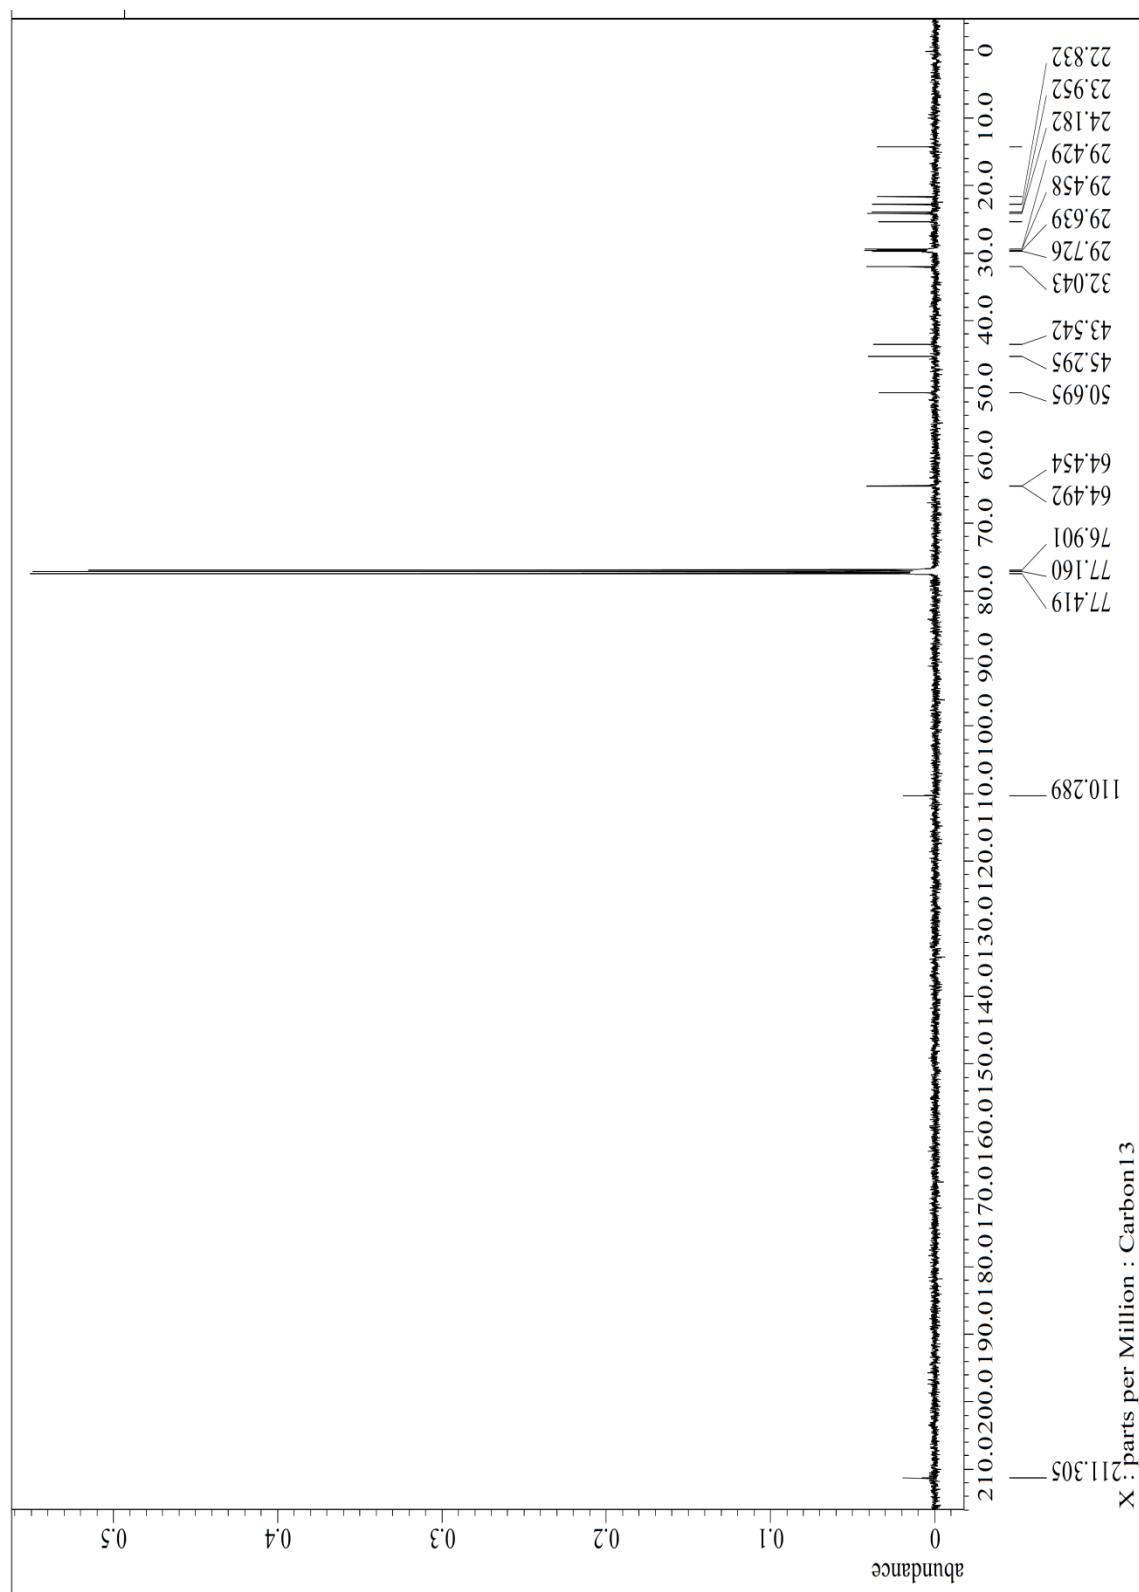



$^1\text{H}$  NMR of **3g**

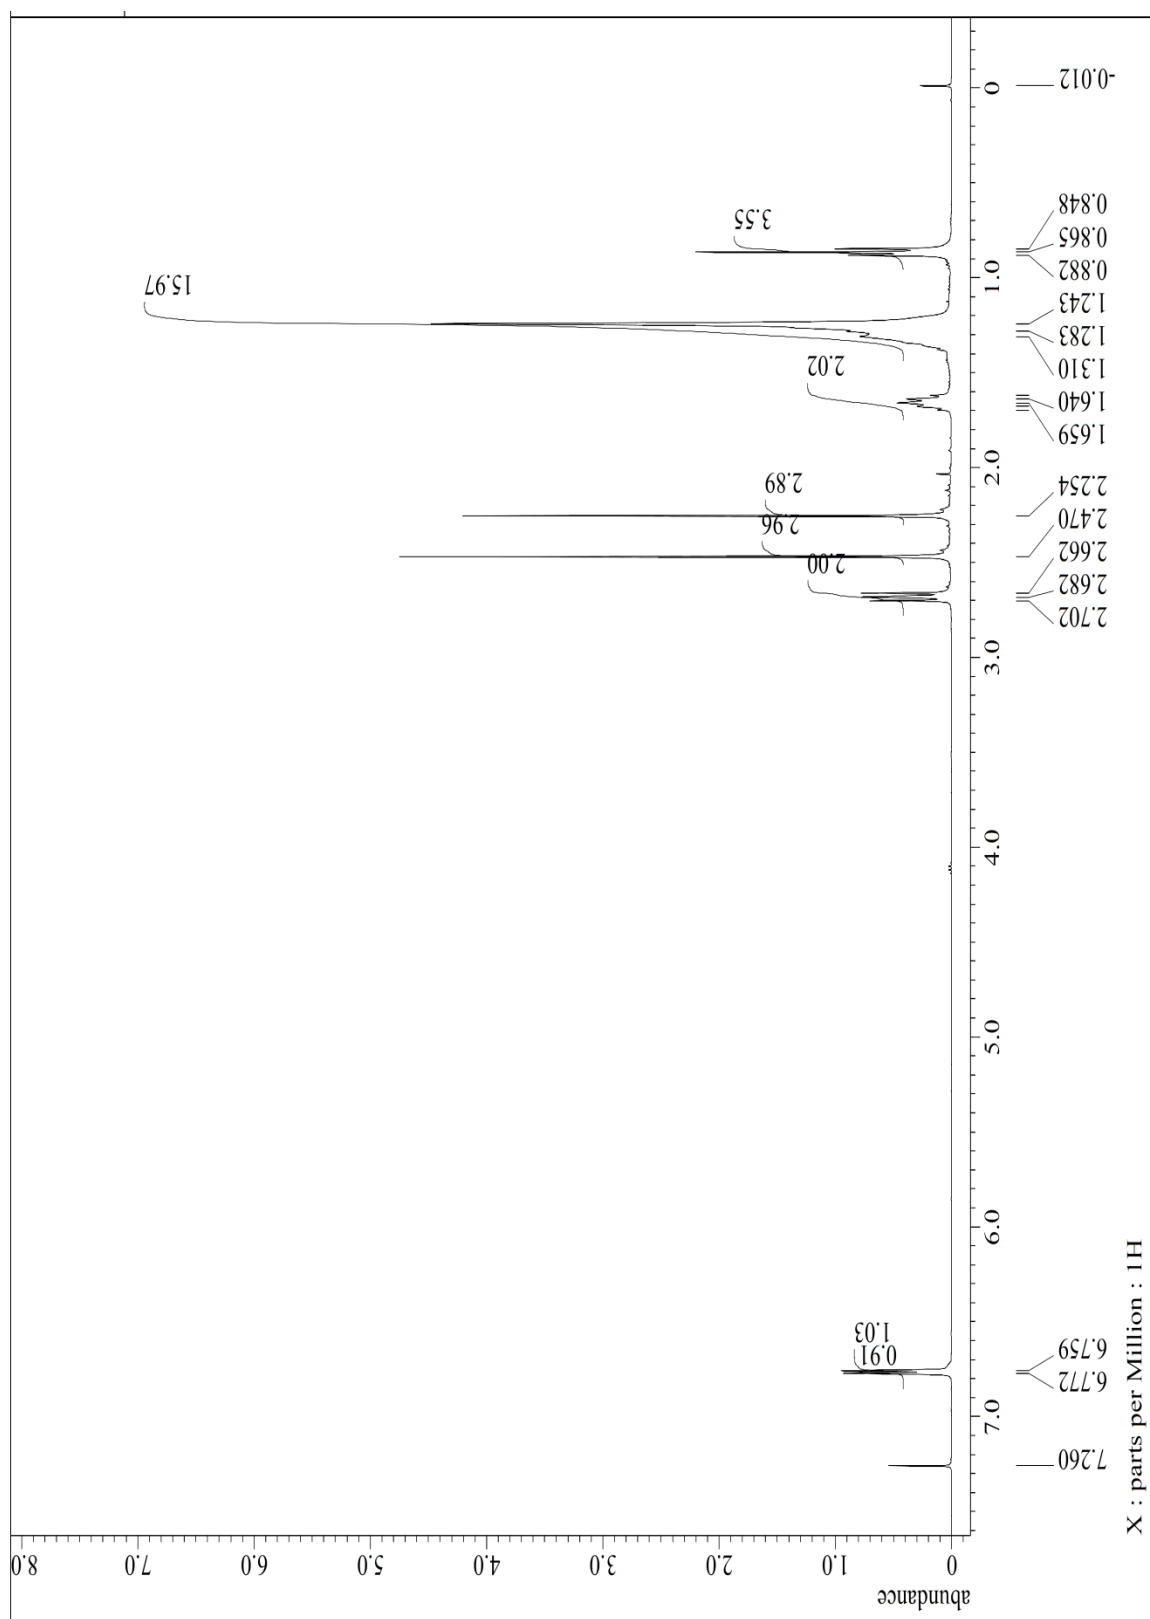

$^{13}\text{C}$  NMR of **3g**

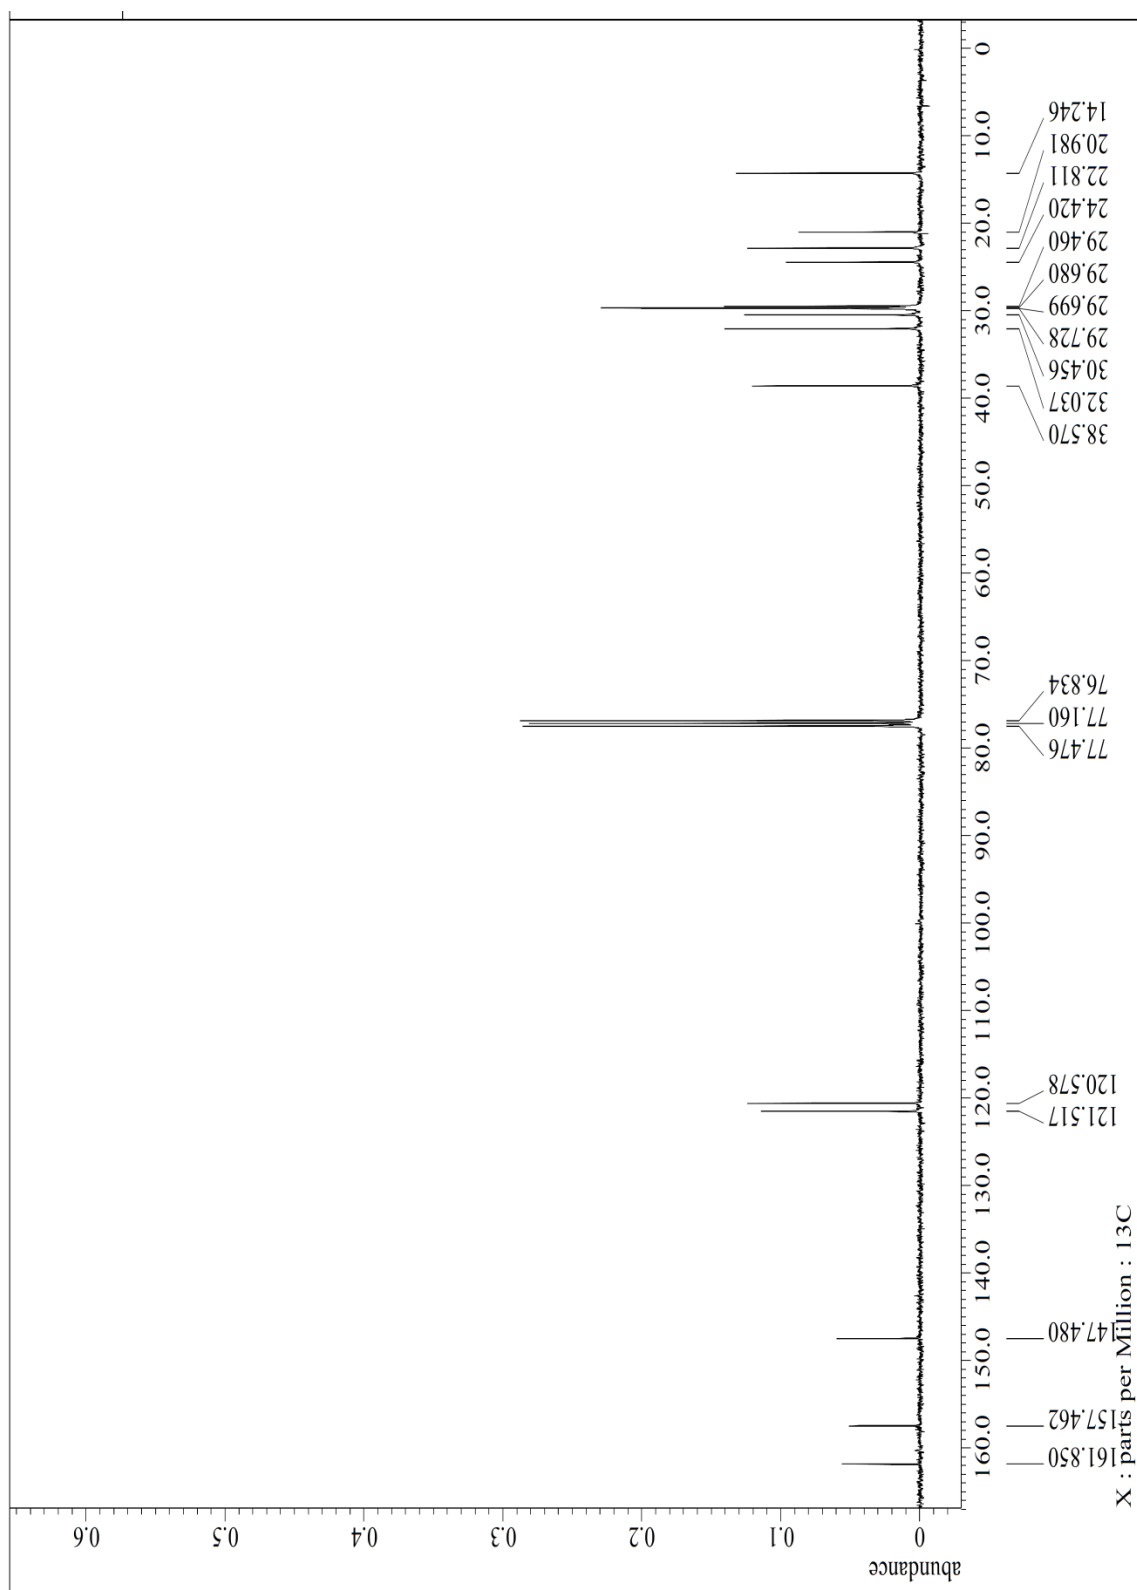

<sup>1</sup>H NMR of **6**

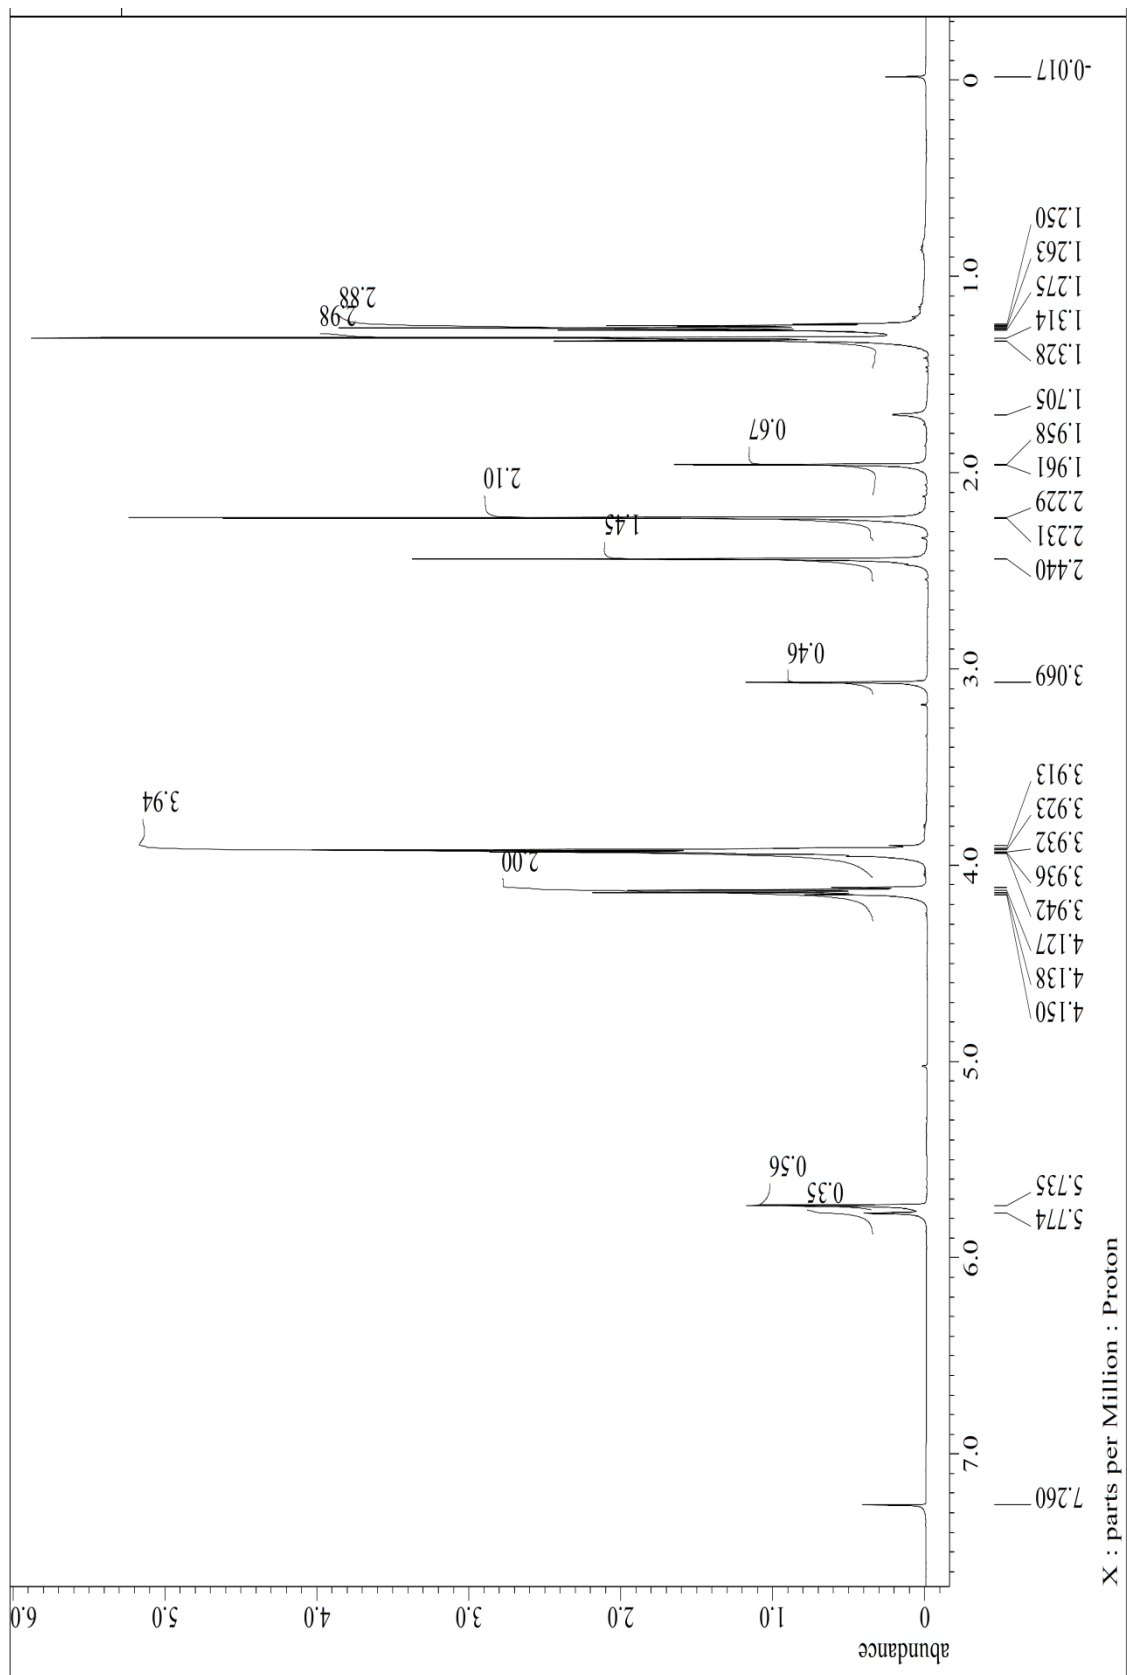

<sup>13</sup>C NMR of 6

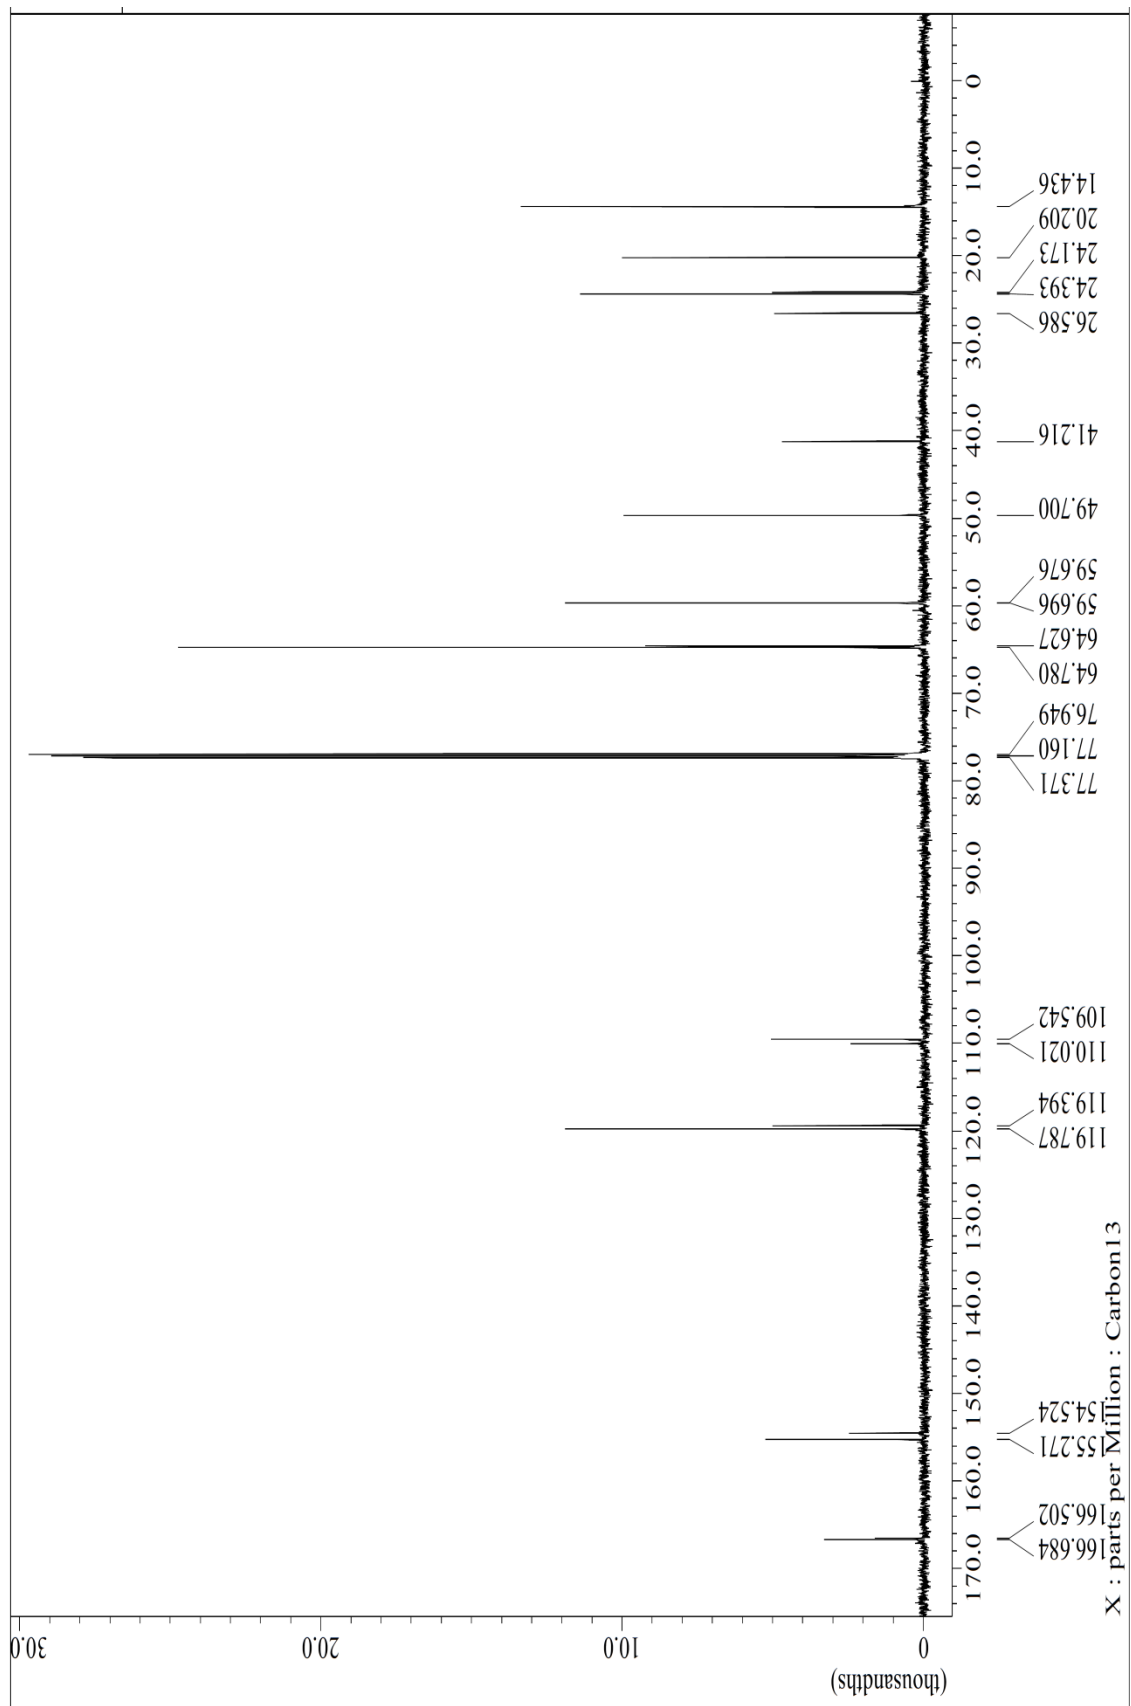

$^1\text{H}$  NMR of 7

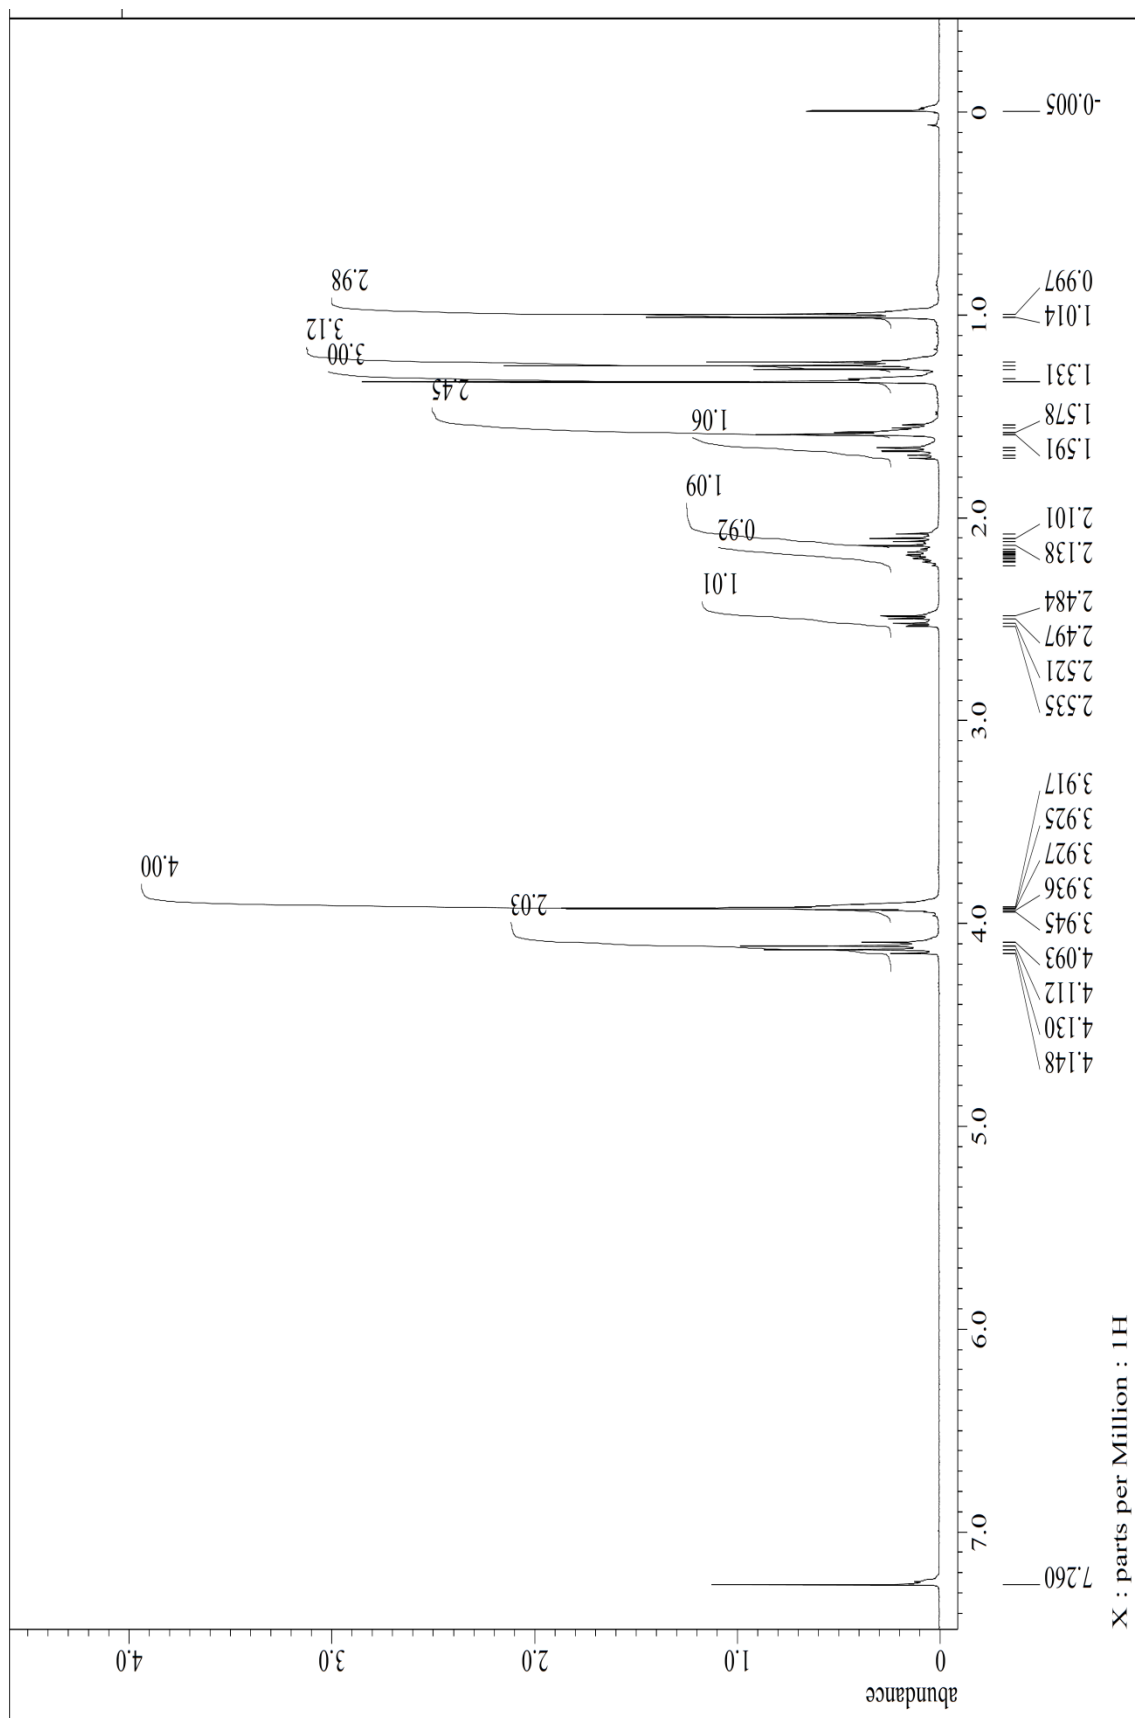

$^{13}\text{C}$  NMR of 7

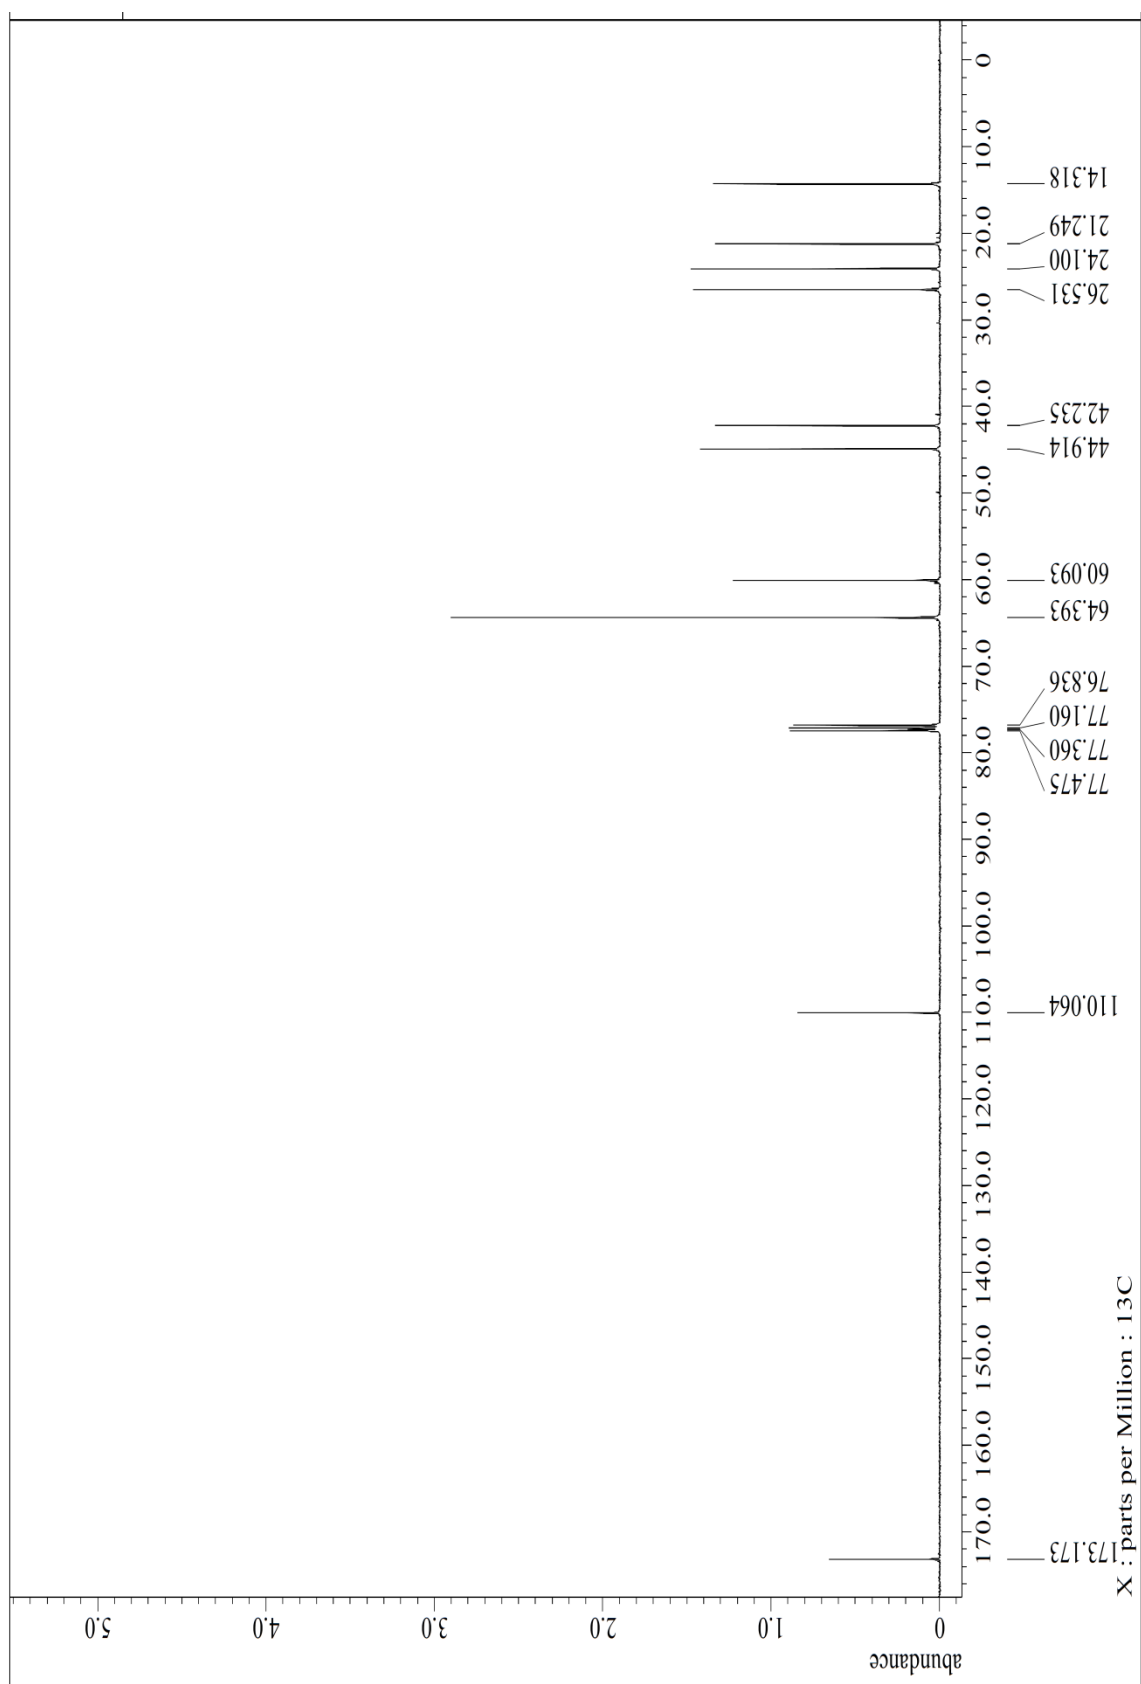

<sup>1</sup>H NMR of **9**

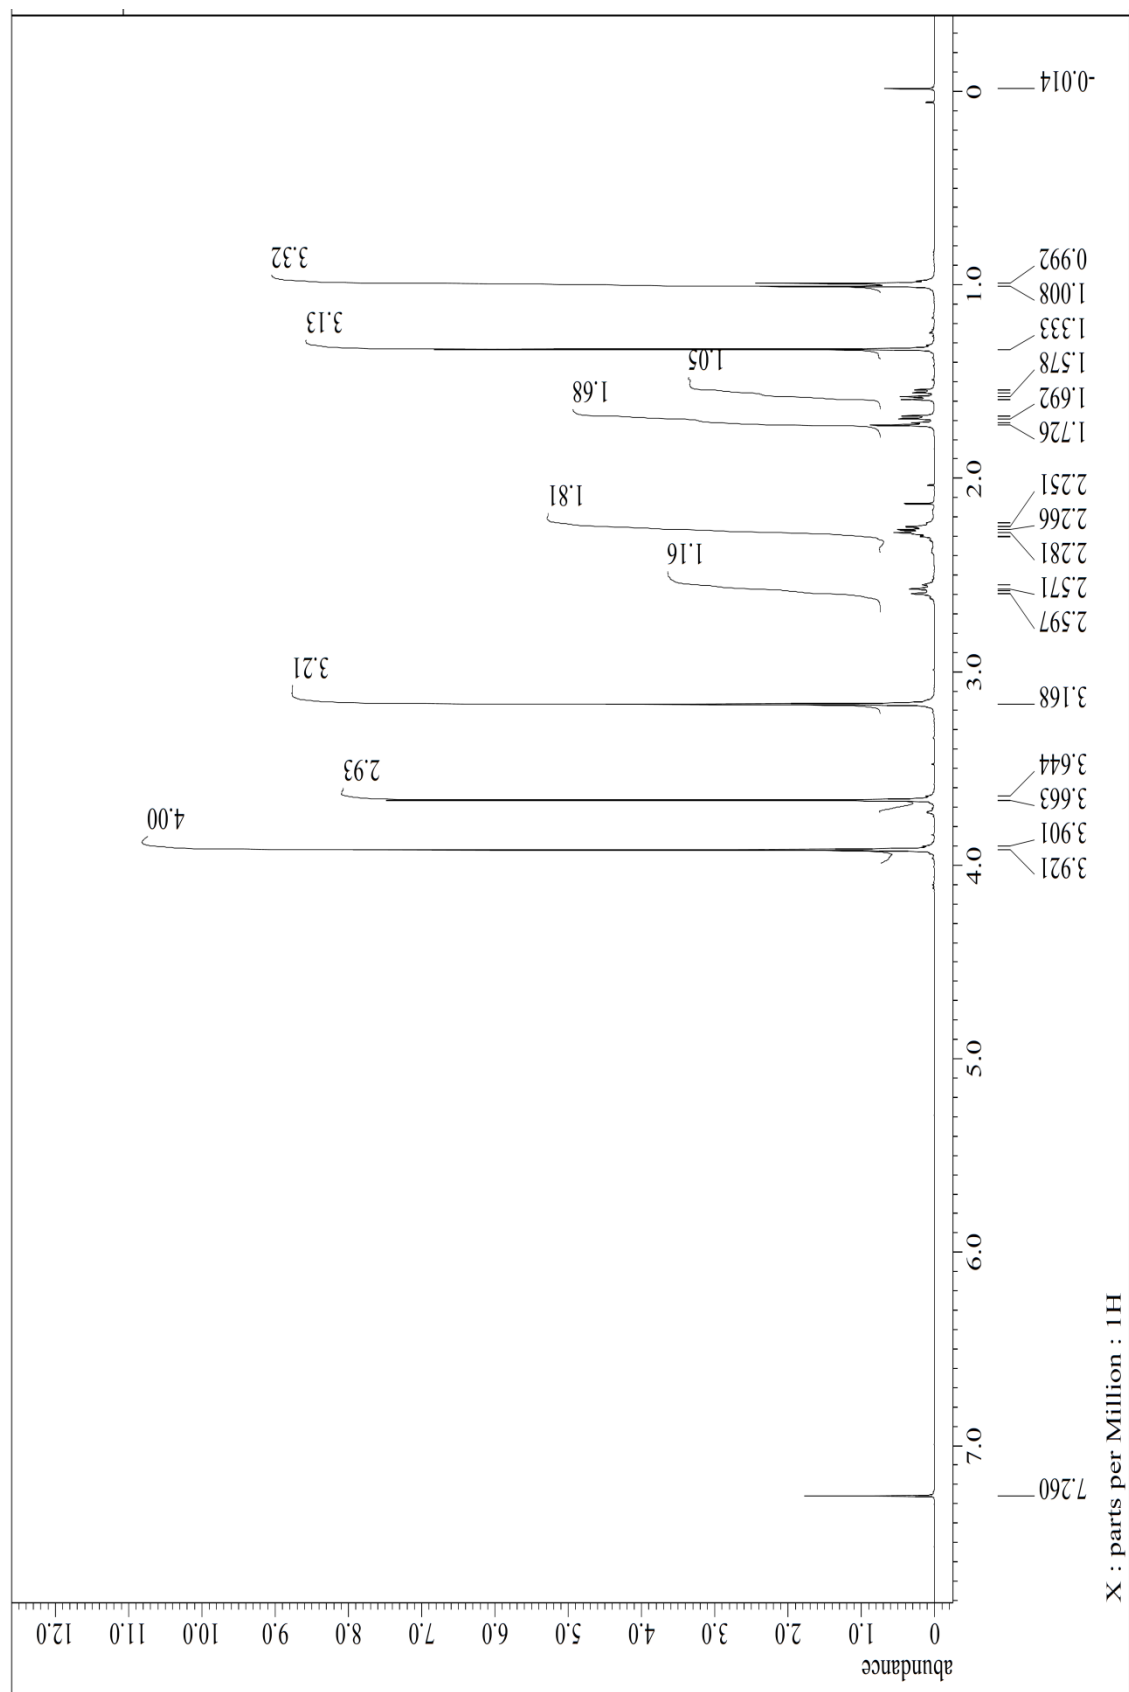

$^{13}\text{C}$  NMR of **9**

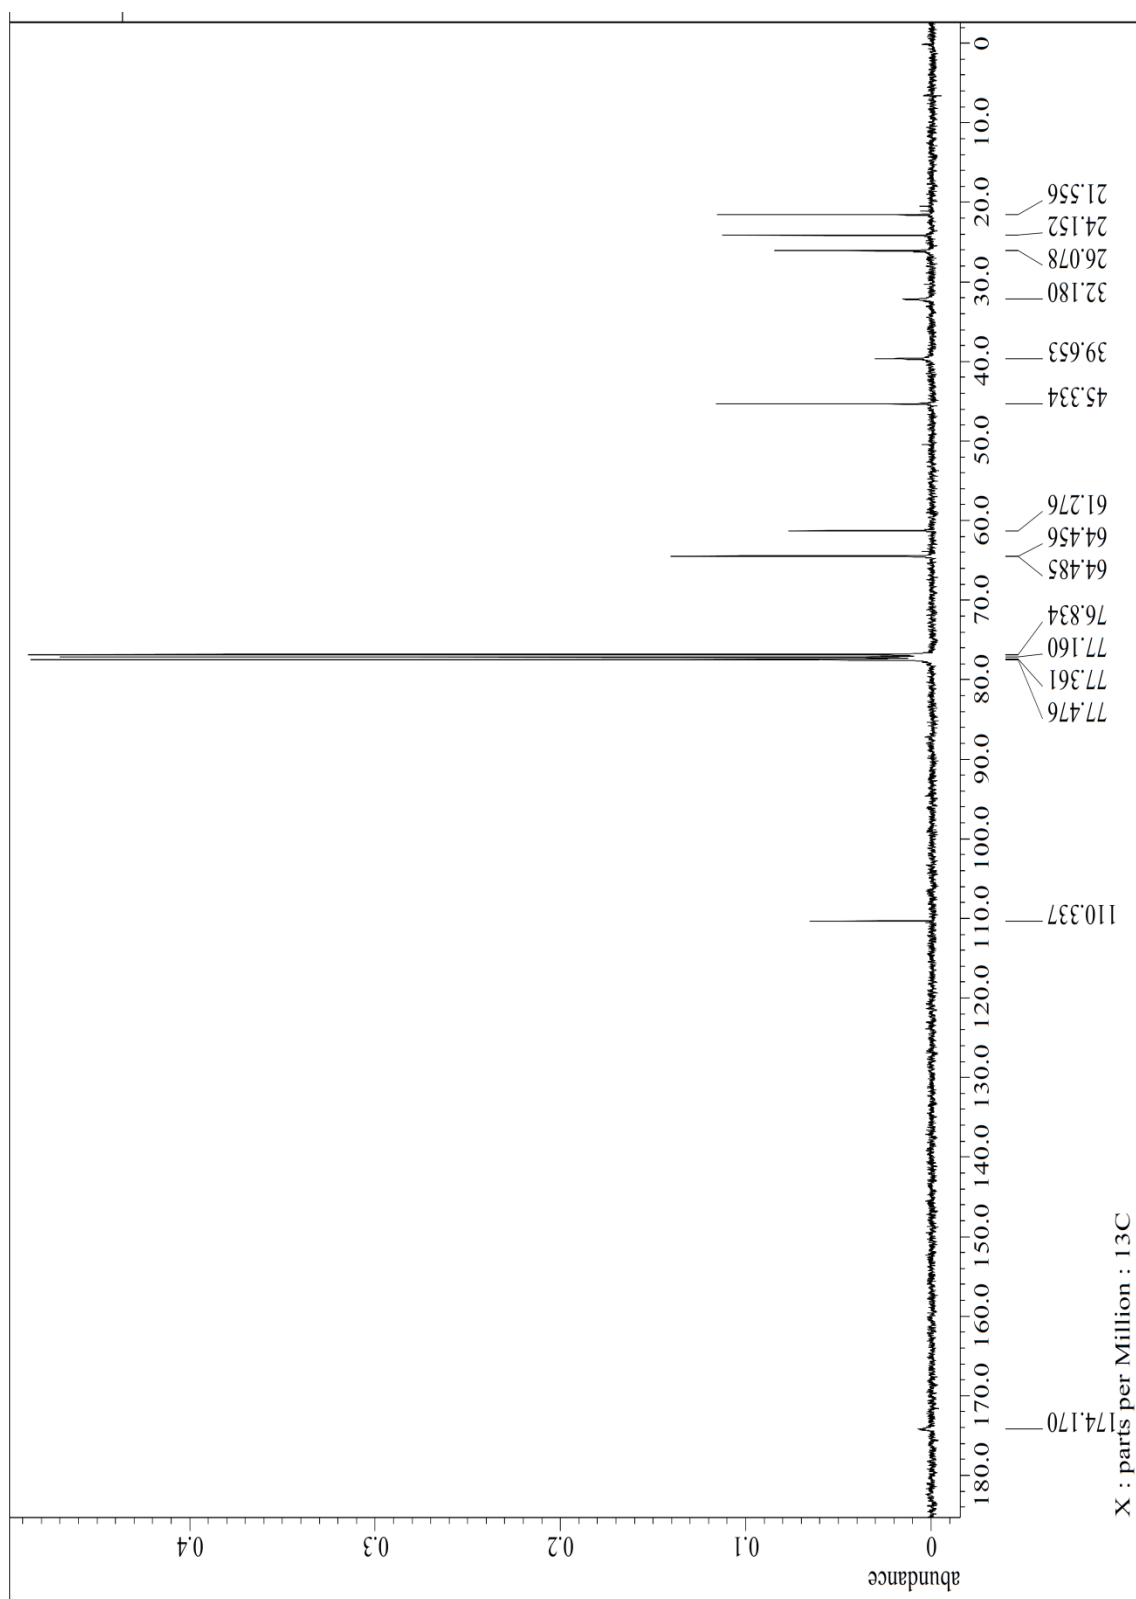



$^1\text{H}$  NMR of **10**

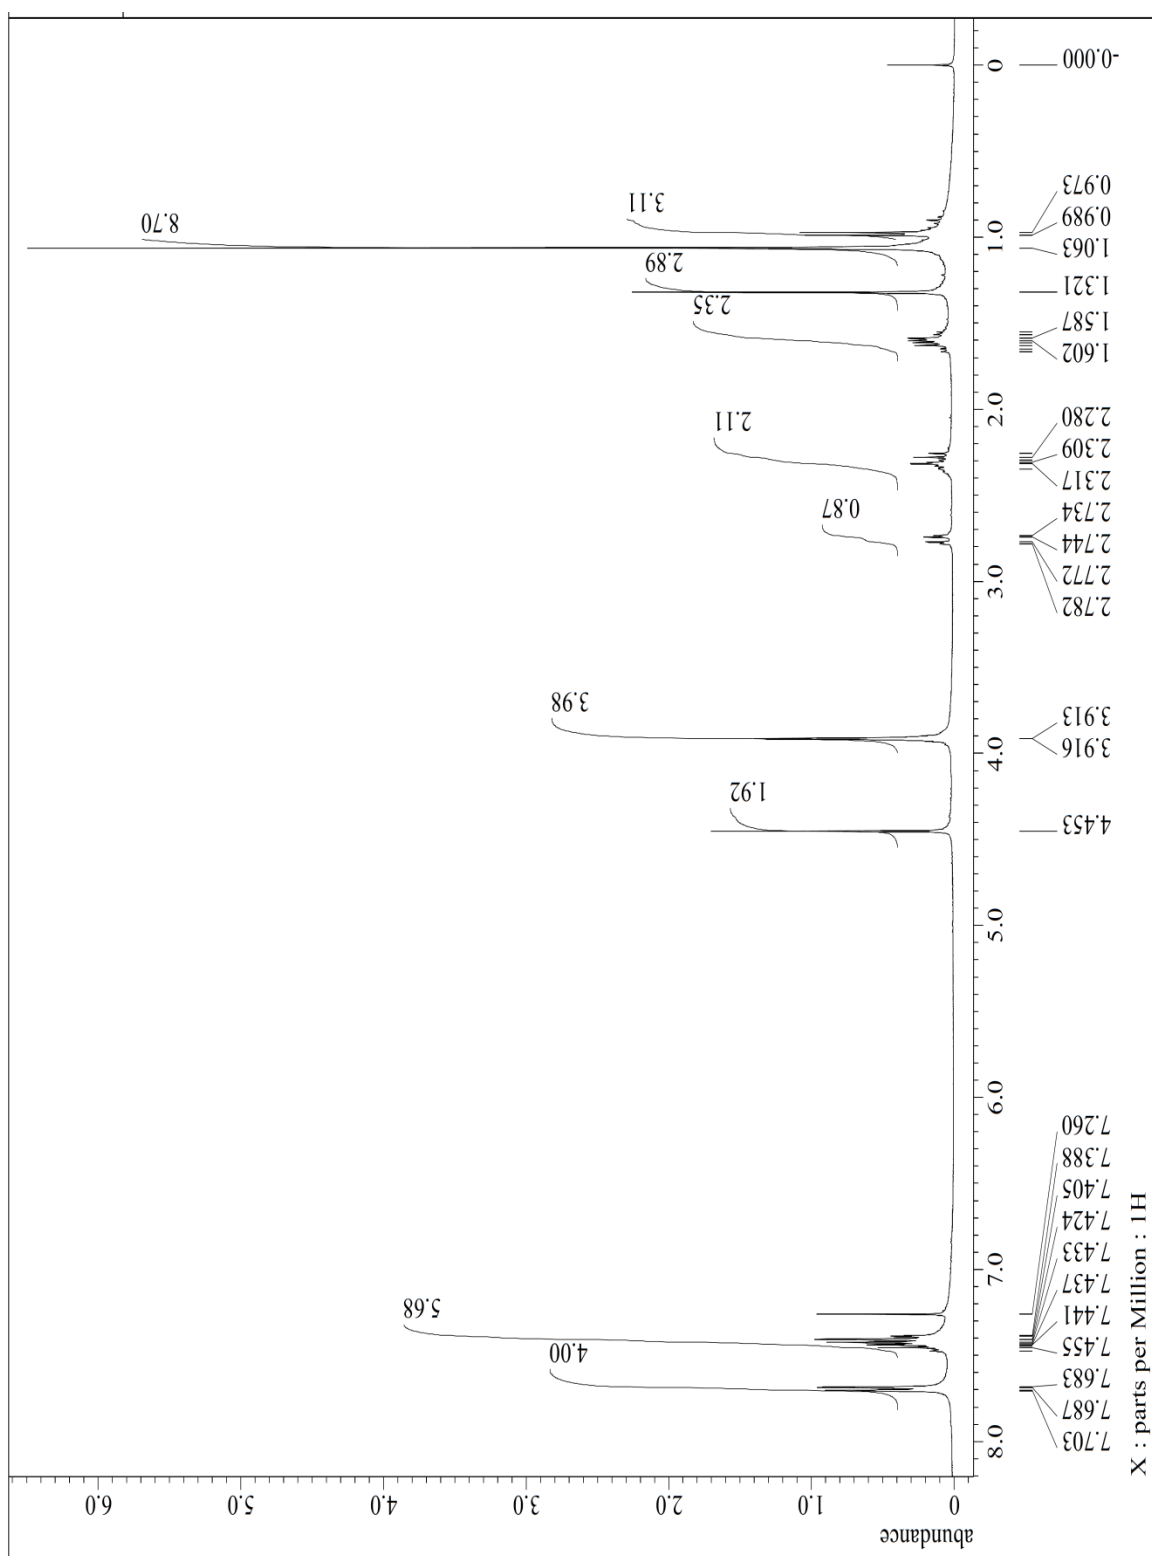

<sup>13</sup>C NMR of **10**

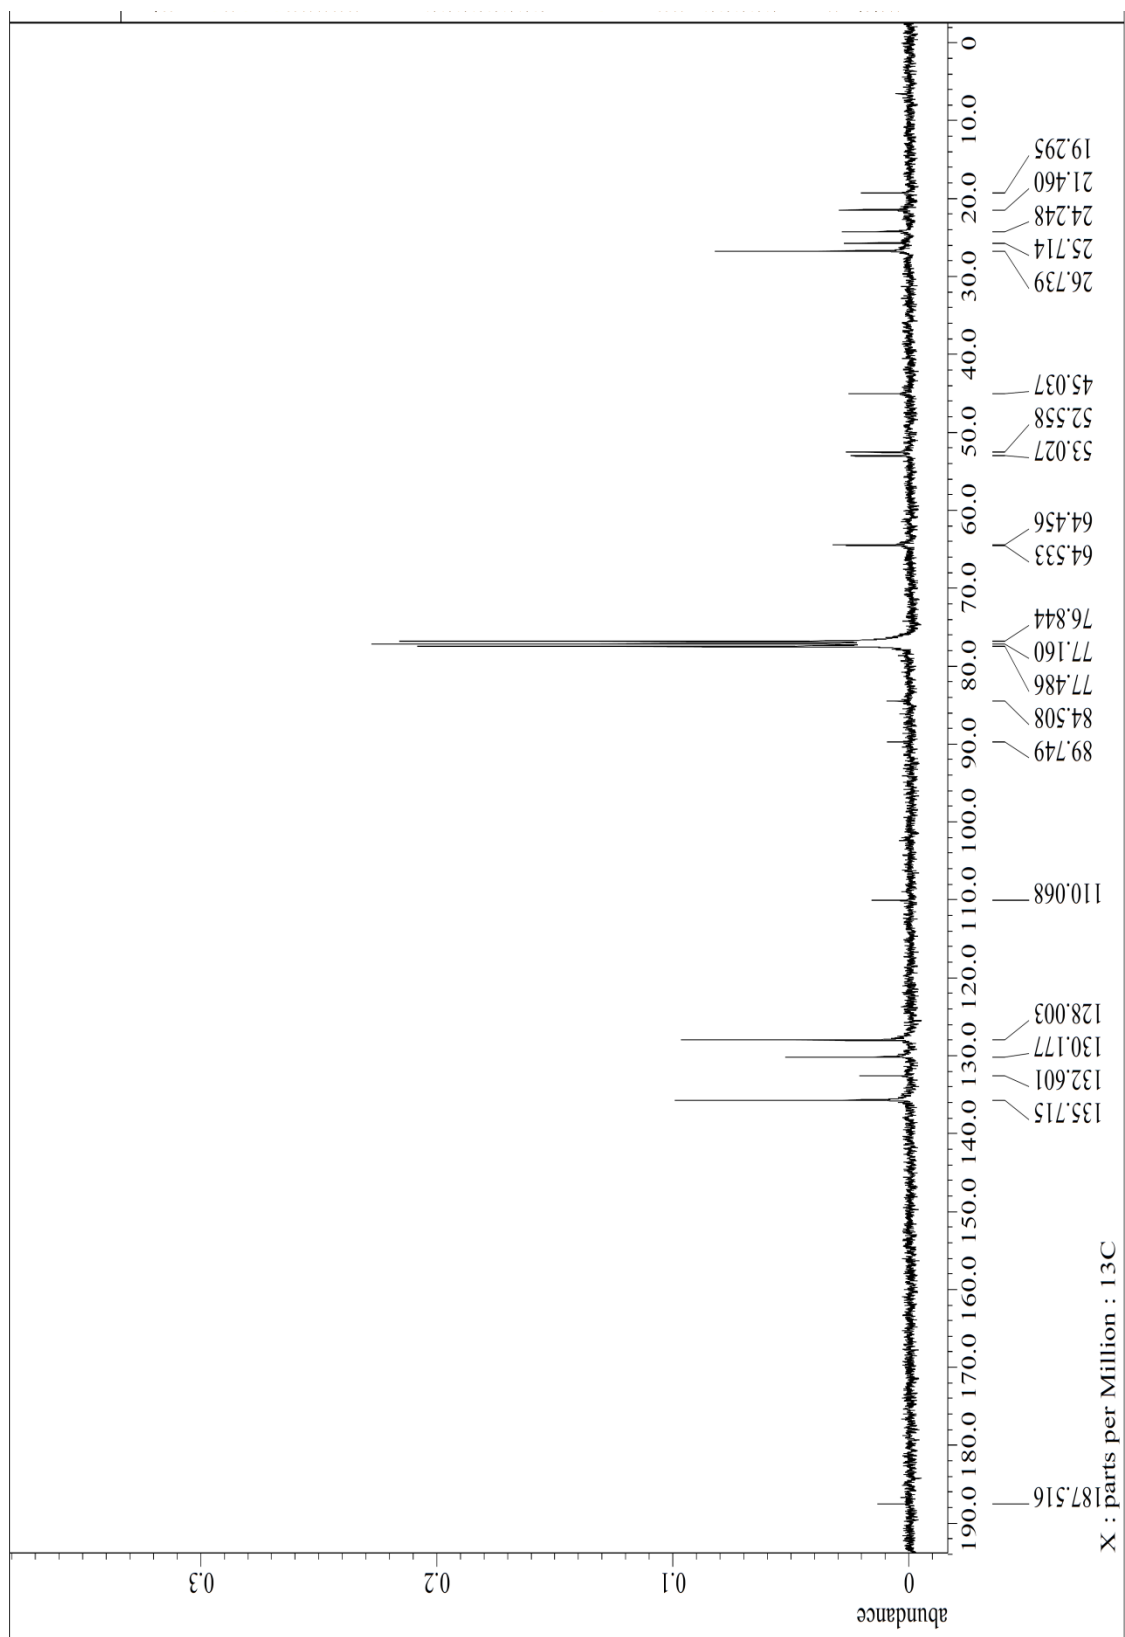

<sup>1</sup>H NMR of **11**

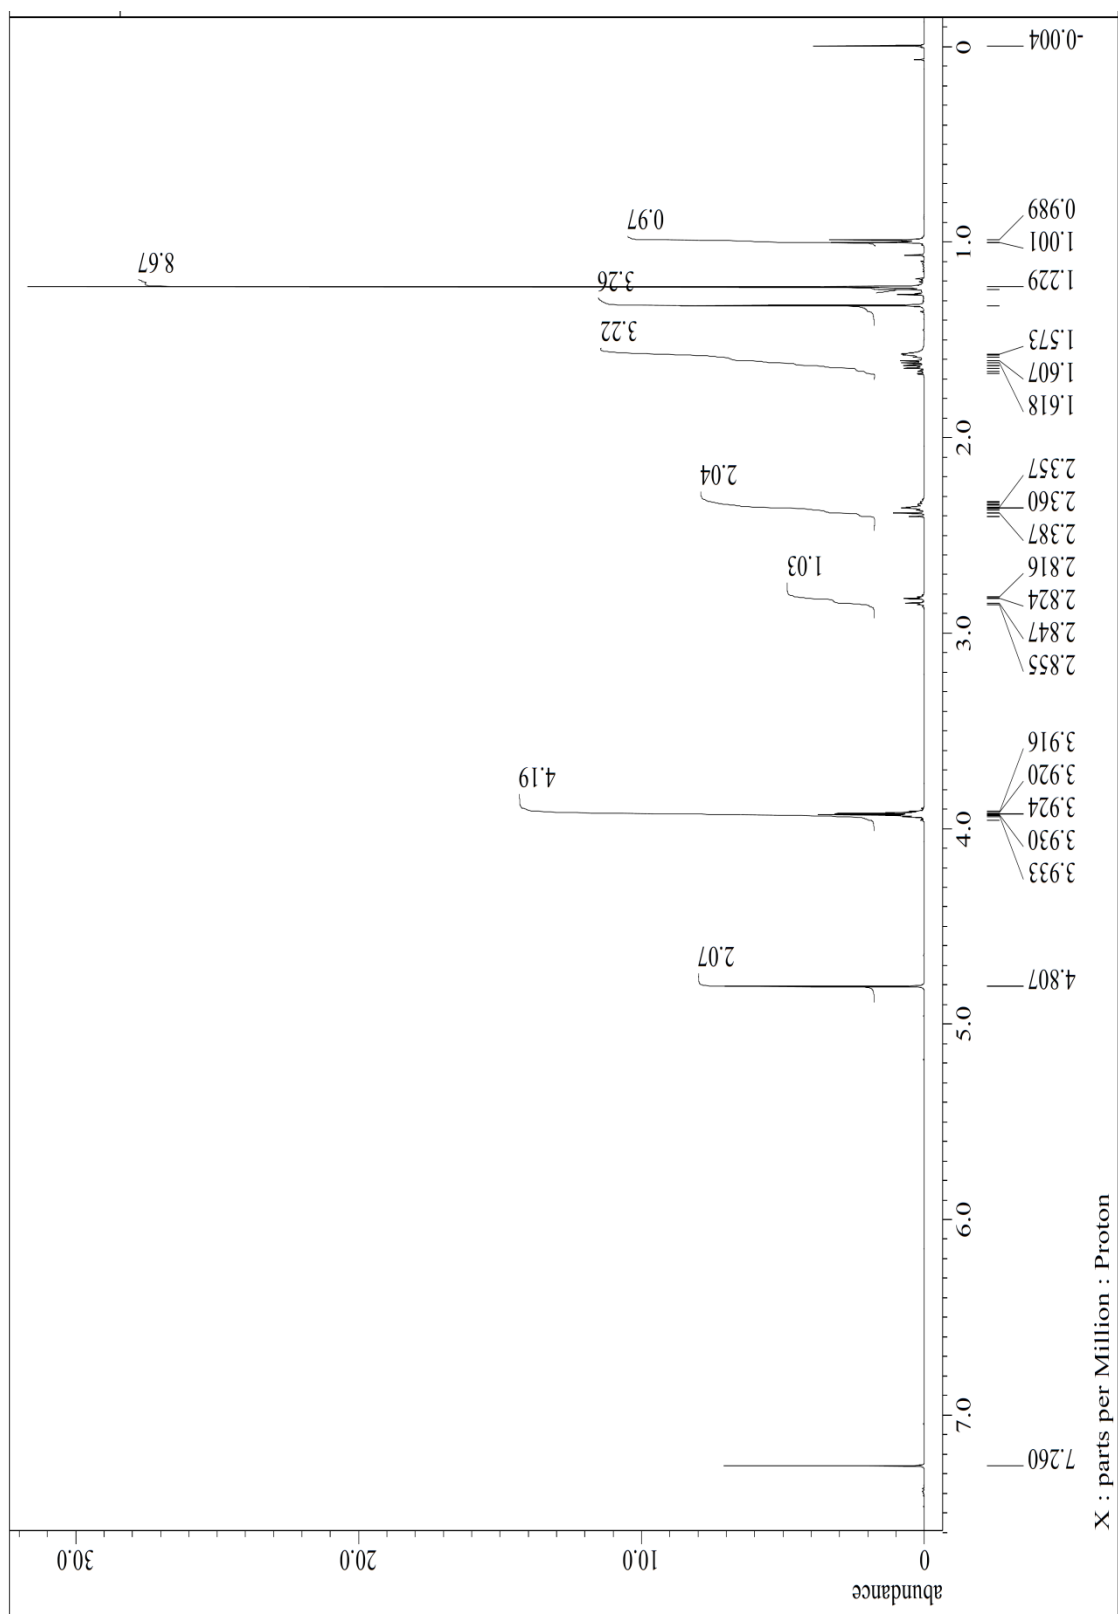

$^{13}\text{C}$  NMR of **11**

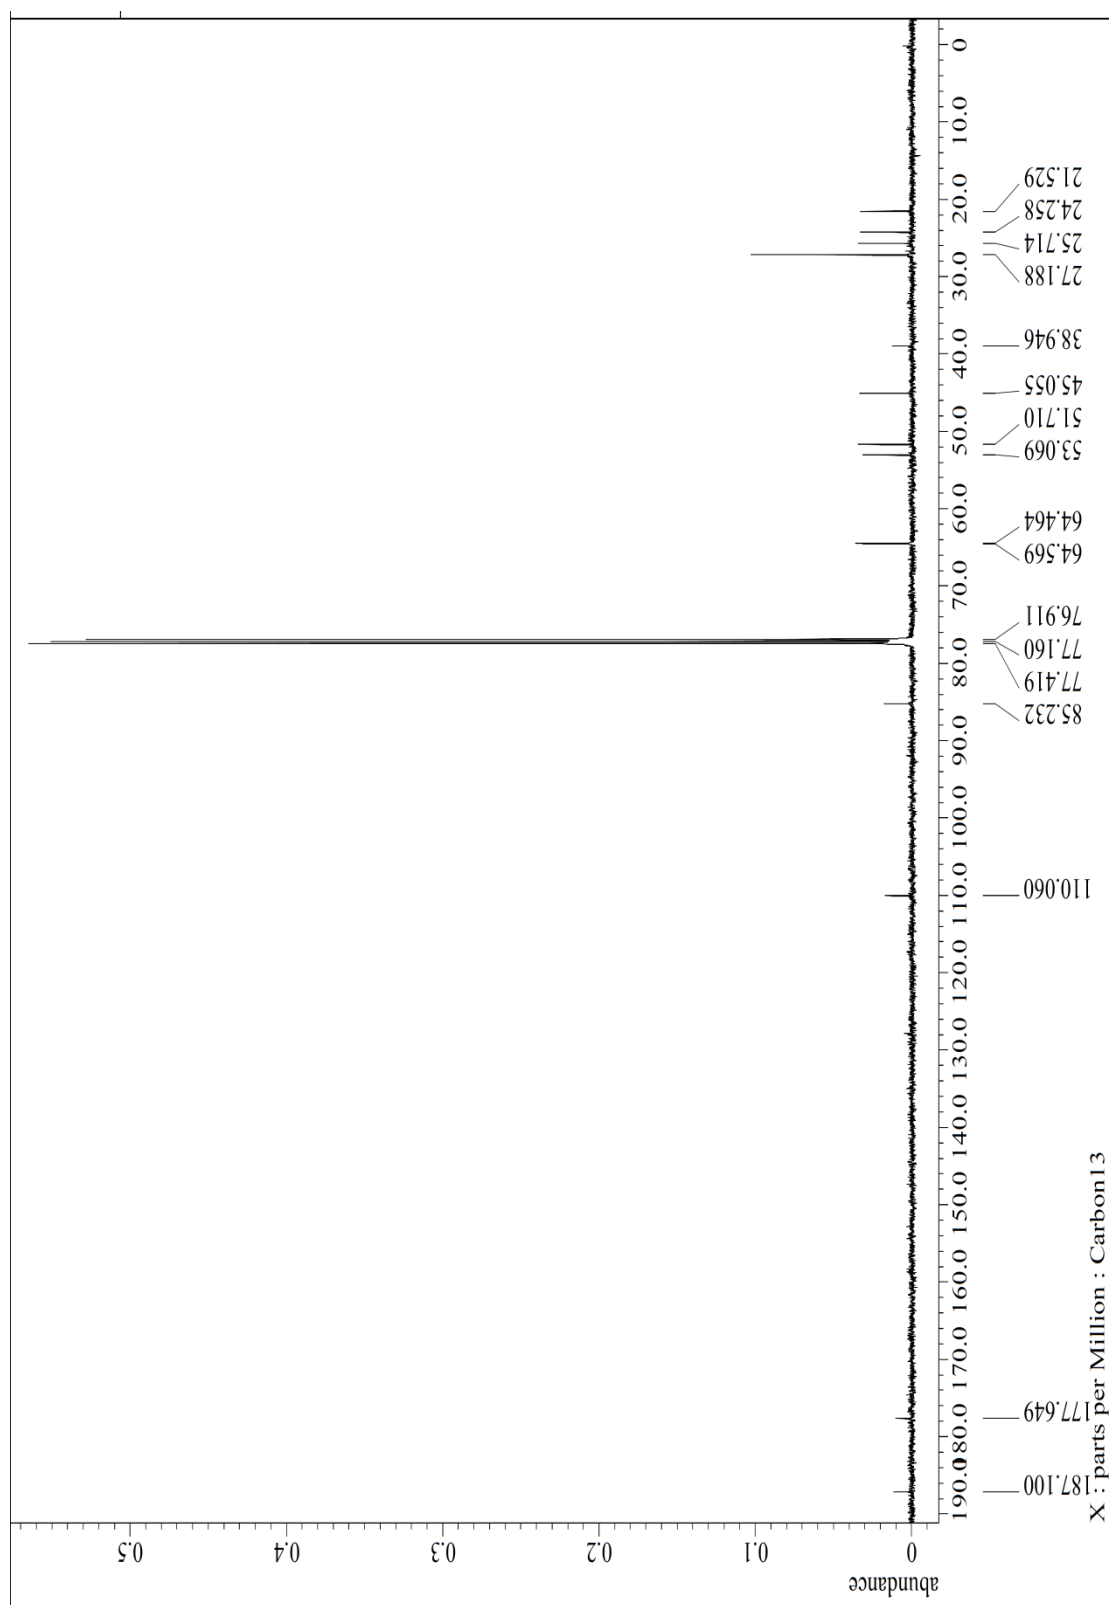

<sup>1</sup>H NMR of **12**

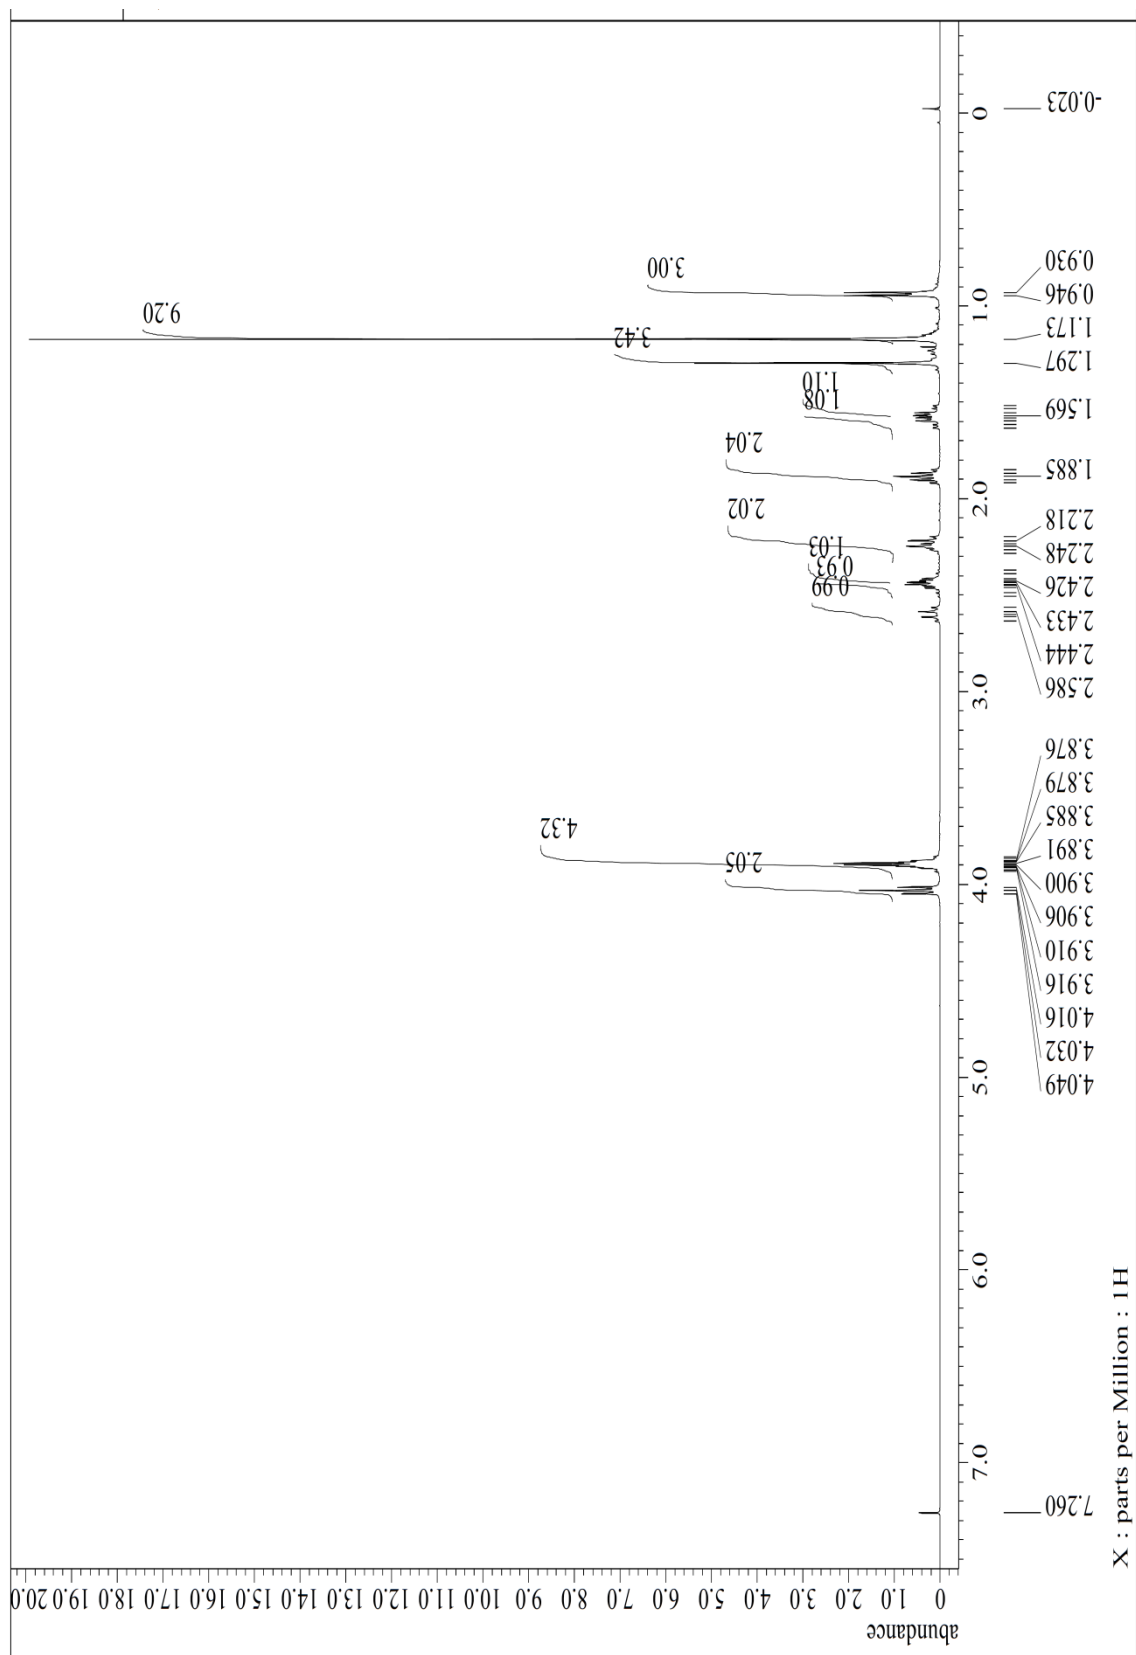

$^{13}\text{C}$  NMR of **12**

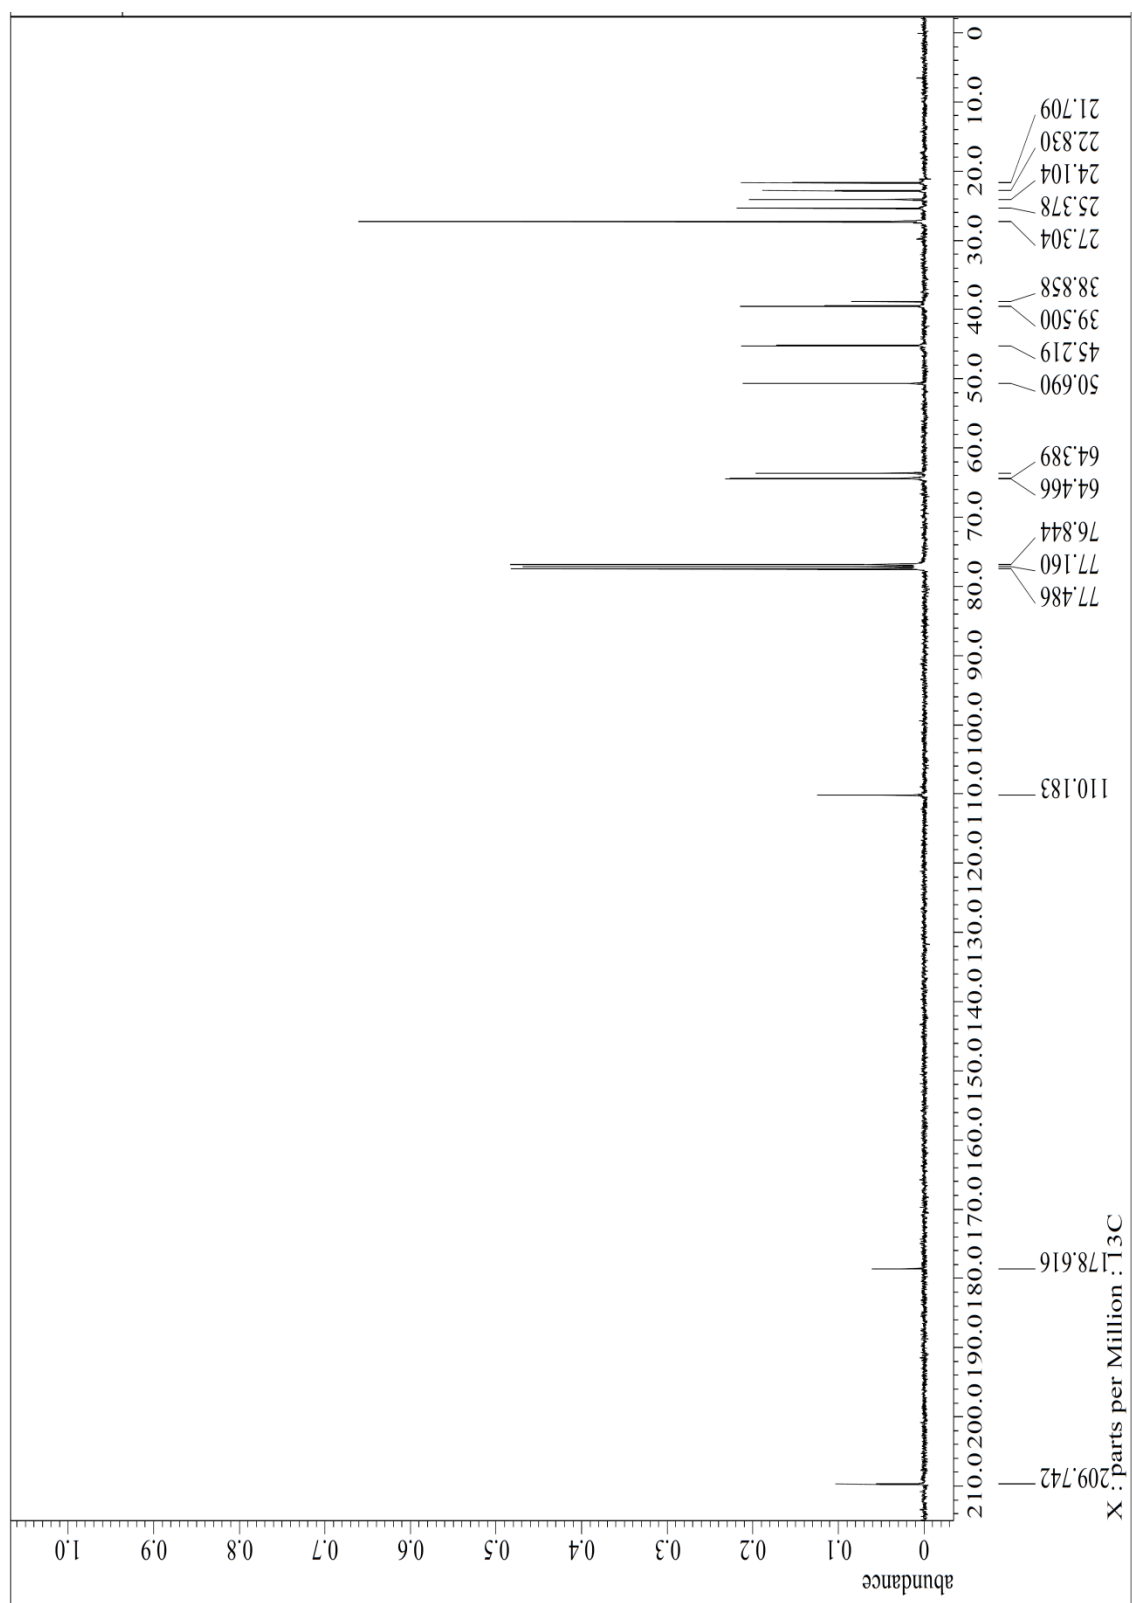

<sup>1</sup>H NMR of **13**

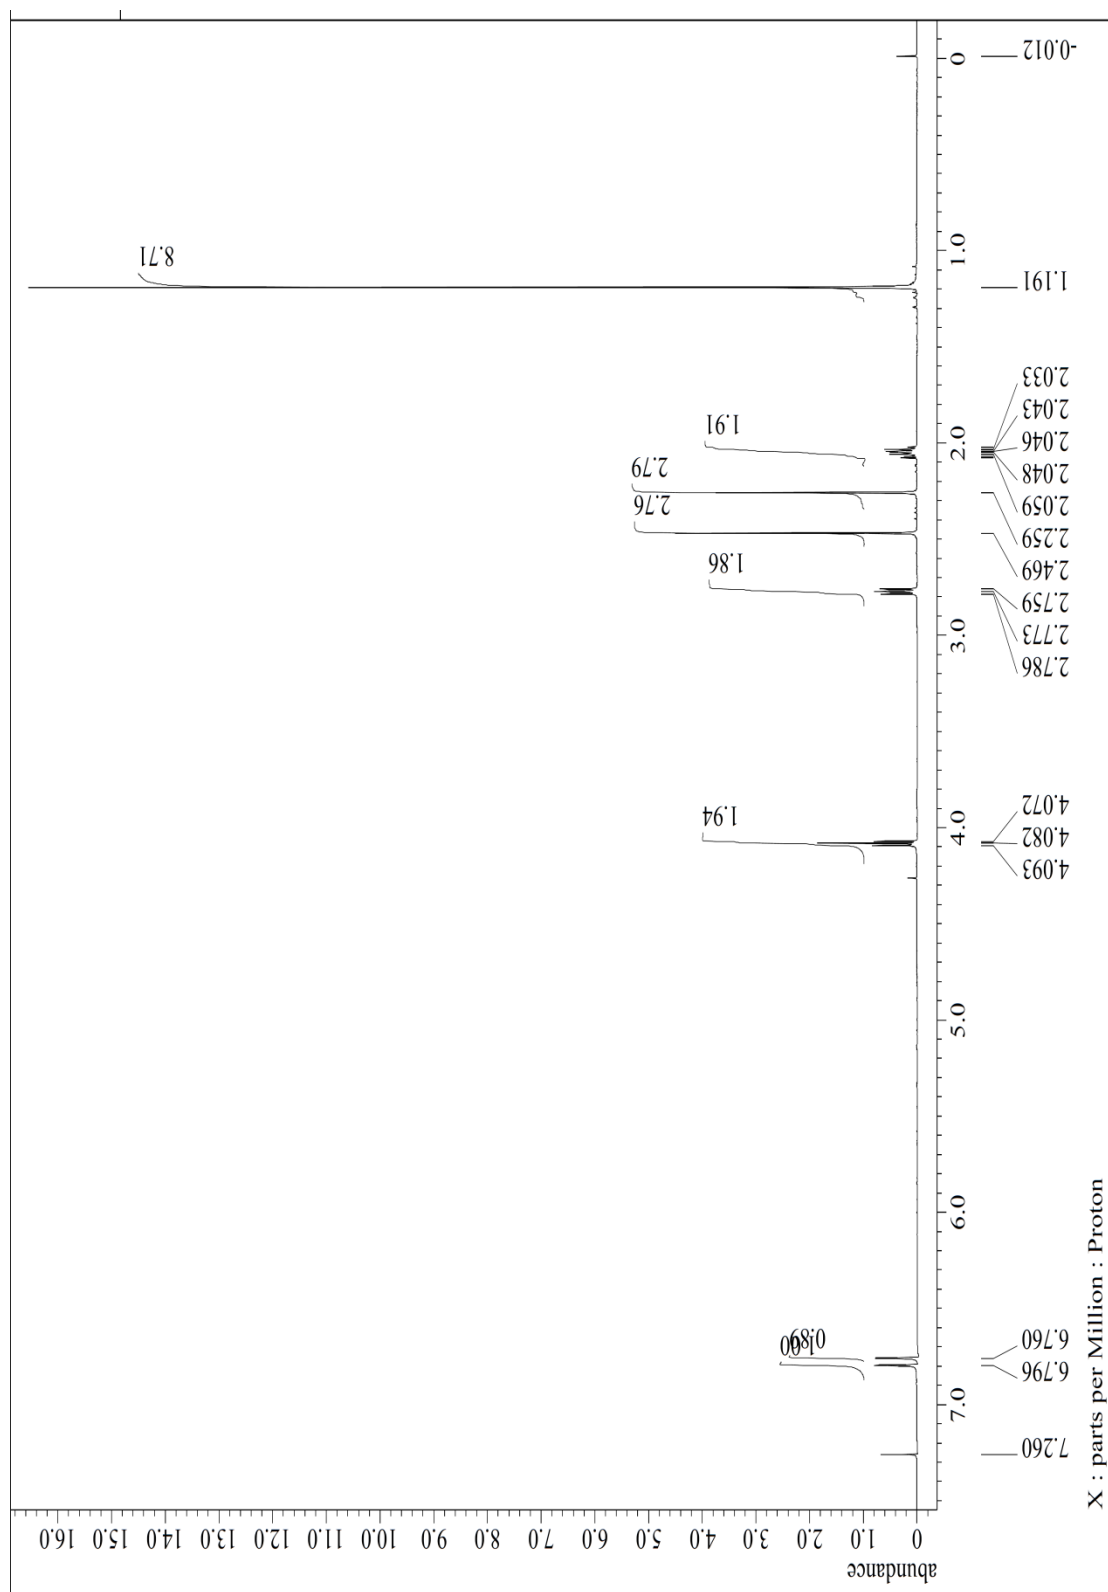

<sup>13</sup>C NMR of **13**

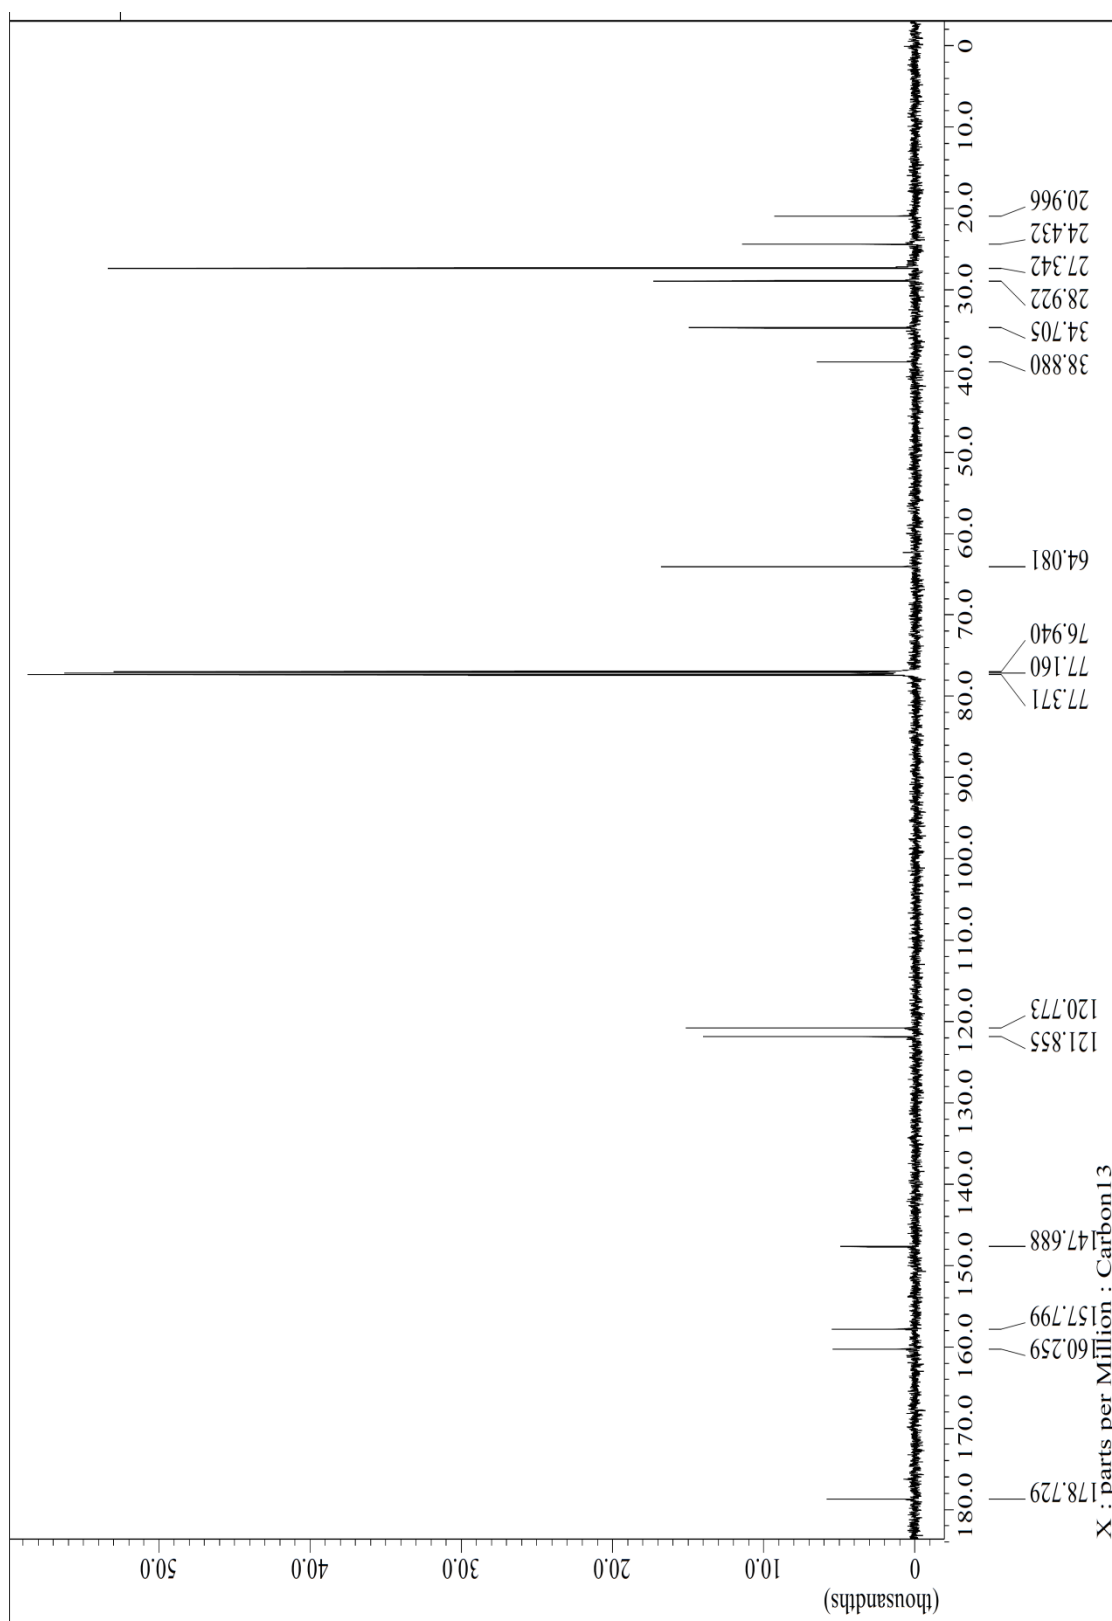



$^1\text{H}$  NMR of **14**

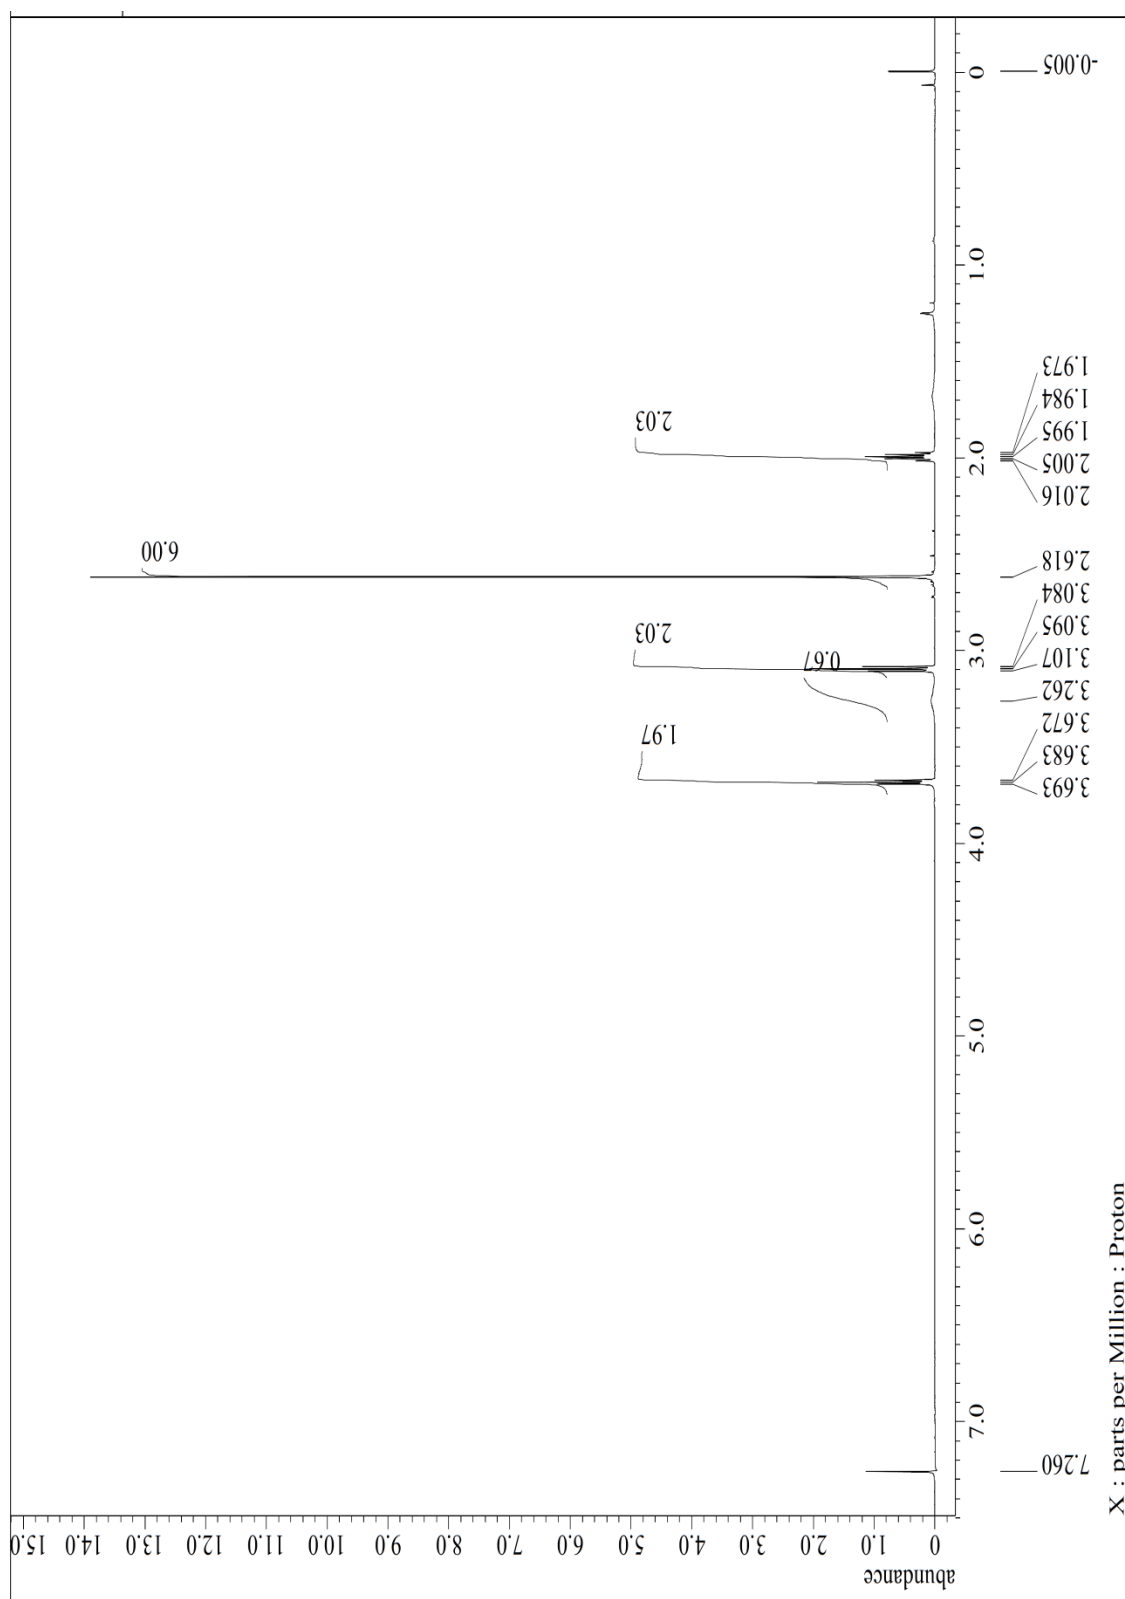

$^{13}\text{C}$  NMR of **14**

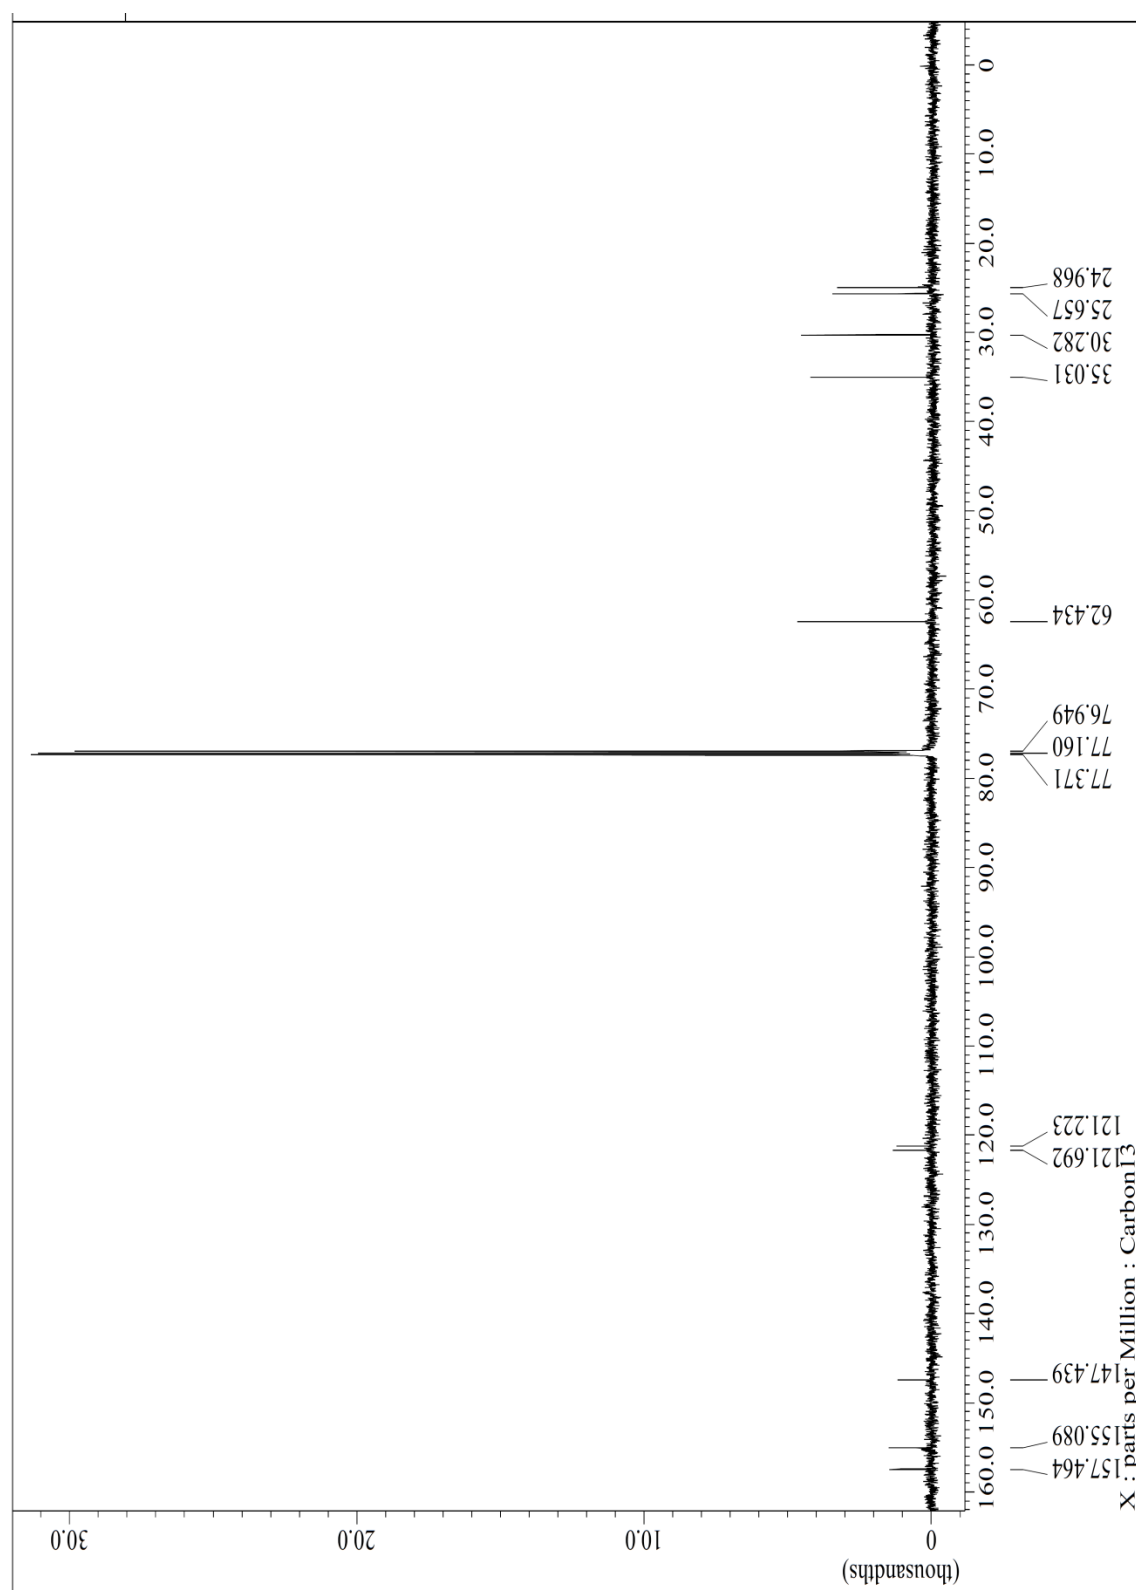

<sup>1</sup>H NMR of Anibamine (1)

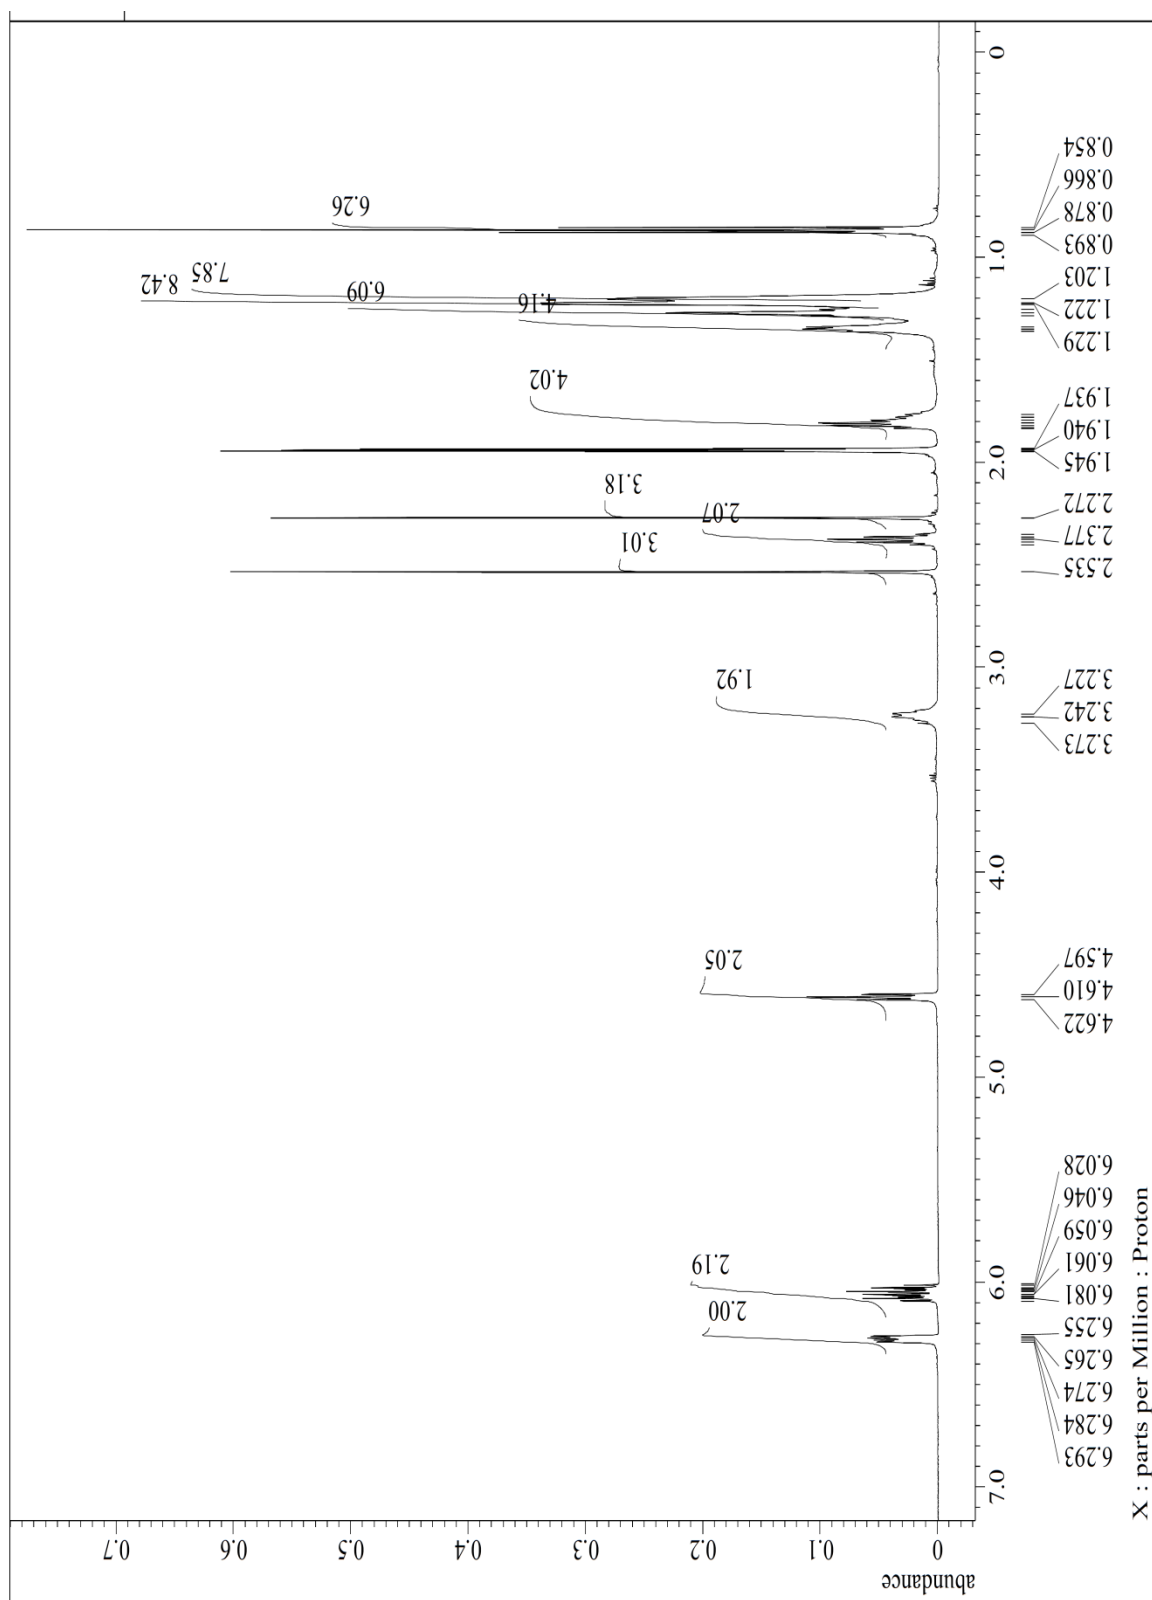

$^{13}\text{C}$  NMR of Anibamine (**1**)

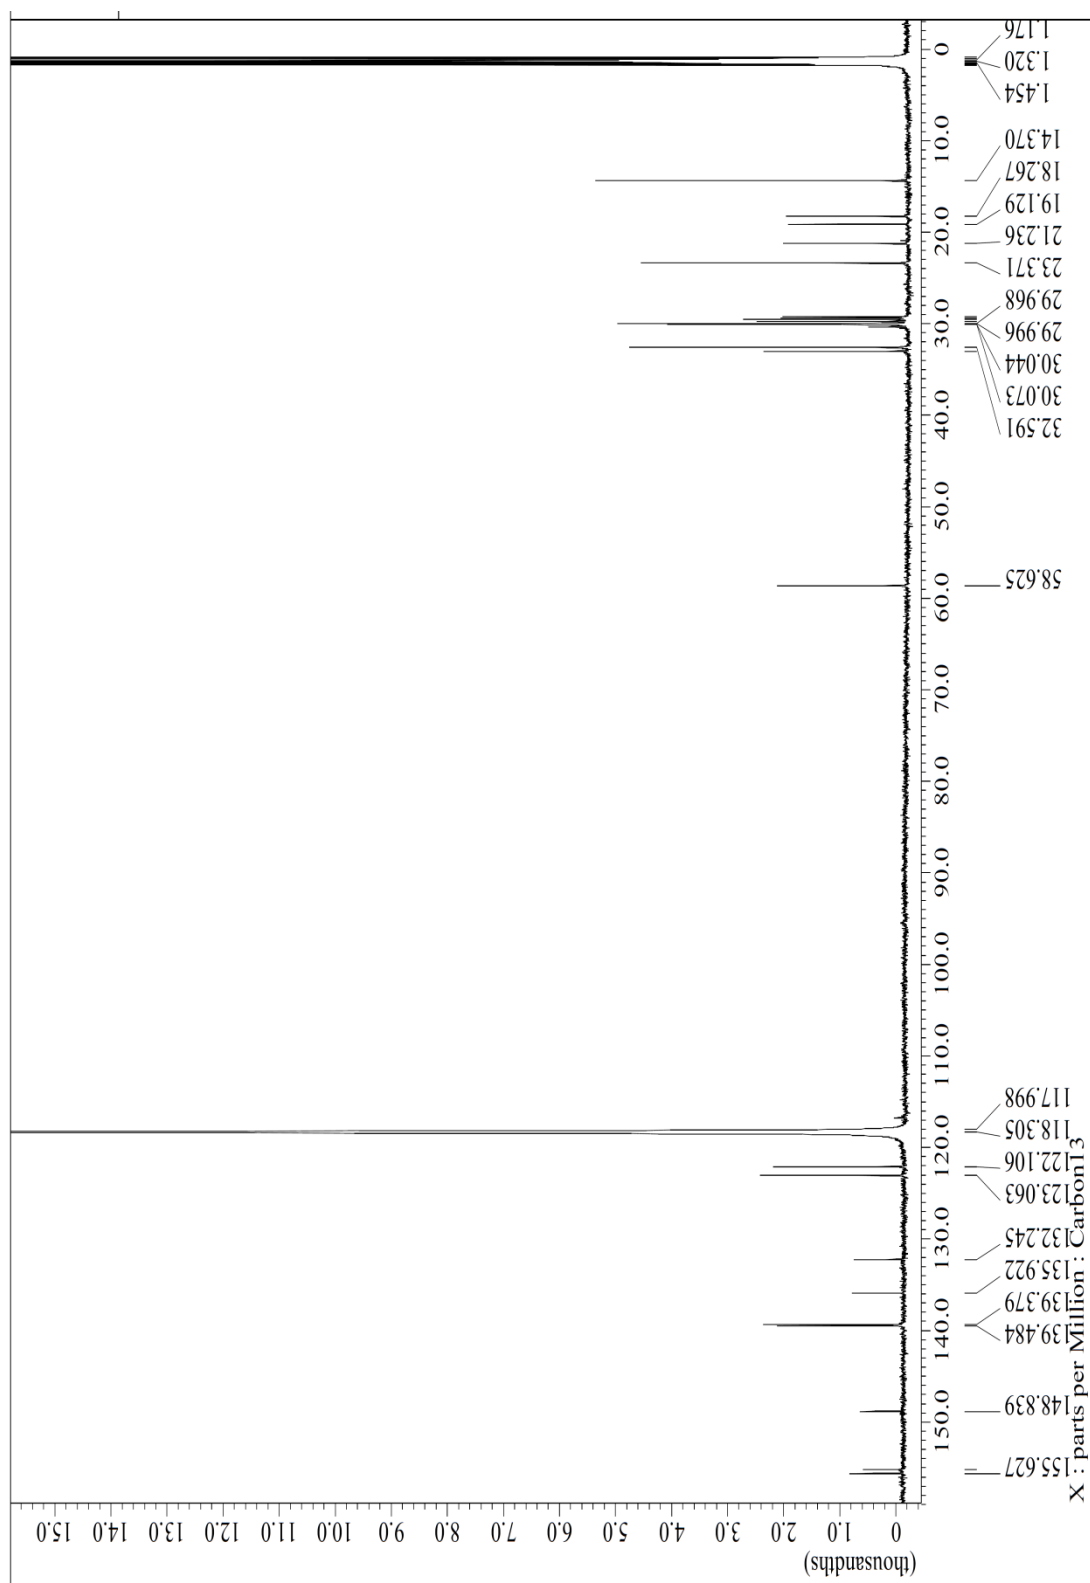

## Spectral comparison with natural anibamine (1)<sup>7</sup> and synthetic one

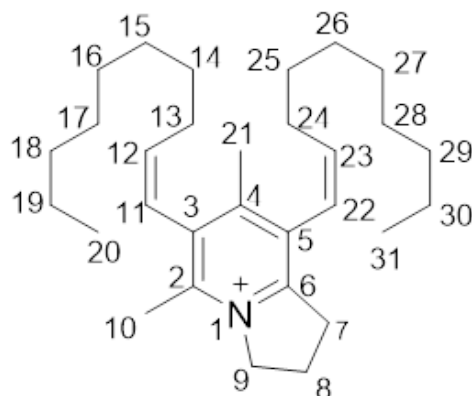

| position | Natural Anibamine<br>( <sup>1</sup> H: 400MHz, <sup>13</sup> C: 100MHz ) |            | Synthetic Anibamine<br>( <sup>1</sup> H: 600MHz, <sup>13</sup> C: 150MHz) |                  | $\Delta\delta_C$ | $\Delta\delta_H$ |
|----------|--------------------------------------------------------------------------|------------|---------------------------------------------------------------------------|------------------|------------------|------------------|
|          | $\delta_C$                                                               | $\delta_H$ | $\delta_C$                                                                | $\delta_H$       |                  |                  |
| 2        | 149.0                                                                    |            | 148.8                                                                     |                  | 0.2              |                  |
| 3        | 135.9                                                                    |            | 135.9                                                                     |                  | 0                |                  |
| 4        | 155.6                                                                    |            | 155.6                                                                     |                  | 0                |                  |
| 5        | 132.2                                                                    |            | 132.2                                                                     |                  | 0                |                  |
| 6        | 155.2                                                                    |            | 155.2                                                                     |                  | 0                |                  |
| 7        | 33.0                                                                     | 3.24       | 33.0                                                                      | 3.23             | 0                | 0.01             |
| 8        | 21.3                                                                     | 2.30       | 21.2                                                                      | 2.38             | 0.1              | 0.08             |
| 9        | 58.6                                                                     | 4.6        | 58.6                                                                      | 4.61             | 0                | 0.01             |
| 10       | 18.3                                                                     | 2.50       | 18.3                                                                      | 2.54             | 0                | 0.04             |
| 11, 22   | 123.0, 122.1                                                             | 6.3        | 123.1, 122.1                                                              | 6.28, 6.27       | 0.1, 0           | 0.02, 0.03       |
| 12, 23   | 139.5, 139.4                                                             | 6.0        | 139.5, 139.4                                                              | 6.07, 6.04       | 0, 0             | 0.07, 0.04       |
| 13, 24   | 29.7, 29.5                                                               | 1.78       | 29.7, 29.5                                                                | 1.80             | 0, 0             | 0.02             |
| 14, 25   | 29.3, 29.2                                                               | 1.40       | 29.4, 29.3                                                                | 1.35             | 0.1, 0.1         | 0.05             |
| 15, 26   | 29.95, 29.95                                                             | 1.21       | 29.97, 29.97                                                              | 1.27, 1.23, 1.20 | 0.02, 0.02       | 0.06, 0.02, 0.01 |
| 16, 27   | 30.03, 29.99                                                             | 1.21       | 30.04, 30.00                                                              | 1.27, 1.23, 1.20 | 0.01, 0.01       | 0.06, 0.02, 0.01 |
| 17, 28   | 30.06, 30.06                                                             | 1.21       | 30.07, 30.07                                                              | 1.27, 1.23, 1.20 | 0.01, 0.01       | 0.06, 0.02, 0.01 |
| 18, 29   | 32.6                                                                     | 1.21       | 32.6                                                                      | 1.27, 1.23, 1.20 | 0                | 0.06, 0.02, 0.01 |
| 19, 30   | 23.3                                                                     | 1.25       | 23.4                                                                      | 1.27             | 0.1              | 0.02             |
| 20, 31   | 14.4                                                                     | 0.83       | 14.4                                                                      | 0.87             | 0                | 0.04             |
| 21       | 19.1                                                                     | 2.26       | 19.1                                                                      | 2.27             | 0                | 0.01             |
